# Supplementary material for: Global importance of Indigenous Peoples, their lands, and knowledge systems for saving the world’s primates from extinction
Source: PubMed Central journal article supplement — Sci Adv. 2022 Aug 10;8(31):eabn2927. doi: 10.1126/sciadv.abn2927 (PMC9365284; doi:10.1126/sciadv.abn2927), 2022-08-10
Supplement: sciadv.abn2927_sm.pdf [file sciadv.abn2927_sm.pdf]

Supplementary Materials for  
**Global importance of Indigenous Peoples, their lands, and knowledge systems  
for saving the world's primates from extinction**

Alejandro Estrada *et al.*

Corresponding author: Alejandro Estrada, [aestradaprimates@gmail.com](mailto:aestradaprimates@gmail.com); Paul A. Garber, [p-garber@illinois.edu](mailto:p-garber@illinois.edu)

*Sci. Adv.* **8**, eabn2927 (2022)  
DOI: 10.1126/sciadv.abn2927

**This PDF file includes:**

Supplementary Text  
Figs. S1 to S7  
Tables S1 to S7  
References

## SUPPLEMENTARY TEXT

### **Definition of Indigeneity**

The principles of Indigeneity which we have adopted in the article are consistent with those of the International Labour Organisation Indigenous and Tribal Peoples Convention 1989 (No. 169) Article 1 (51) of which describes Indigenous Peoples as:

“(a) tribal peoples in independent countries whose social, cultural and economic conditions distinguish them from other sections of the national community, and whose status is regulated wholly or partially by their customs or traditions or by special laws or regulations; (b) peoples in independent countries who are regarded as Indigenous on account of their descent from the populations which inhabited the country, or a geographical region to which the country belongs, at the time of conquest or colonization or the establishment of present state boundaries and who, irrespective of their legal status, retain some or all of their own social, economic, cultural and political institutions.”

([https://www.ilo.org/dyn/normlex/en/f?p=NORMLEXPUB:12100:0::NO::P12100\\_INSTRUMENT\\_ID:312314](https://www.ilo.org/dyn/normlex/en/f?p=NORMLEXPUB:12100:0::NO::P12100_INSTRUMENT_ID:312314))

**The United Nations Declaration on the Rights of Indigenous Peoples** has adopted a similar definition (<https://www.un.org/development/desa/indigenouspeoples/publications/martinez-cobo-study.html>)

“Indigenous communities, peoples and nations are those which, having a historical continuity with pre-invasion and pre-colonial societies that developed on their territories, consider themselves distinct from other sectors of the societies now prevailing on those territories, or parts of them. They form at present non-dominant sectors of society and are determined to preserve, develop and transmit to future generations their ancestral territories, and their ethnic identity, as the basis of their continued existence as peoples, in accordance with their own cultural patterns, social institutions and legal system. It also notes that an indigenous person is: ... one who belongs to these indigenous populations through self-identification as indigenous (group consciousness) and is recognized and accepted by these populations as one of its members (acceptance by the group). This preserves for these communities the sovereign right and power to decide who belongs to them, without external interference”.

### **A brief history of the Malagasy ethnic groups of Madagascar**

An important criterion for identifying one group as Indigenous is their "historical precedence" when compared to other sectors of the national society. This means having a historical continuity with pre-invasion or pre-colonial societies that developed on their territories and consider themselves distinct from other sectors of the societies now prevailing in these countries. In the case of Madagascar, this historical precedence does not apply, as most Malagasy ethnic groups arrived about the same time on the island. Most of the ethnic groups in Madagascar would classify as local communities. Their ancestry is largely a combination of continental African Bantu-speaking peoples who migrated from the eastern coast of mainland Africa, and Southeast Asian migrants of Austronesian stock, who migrated from Borneo and other islands of Indonesia (251).

Studies of phylogenetic inference of the dialects of Madagascar place the landing date of Indonesian sailors at about 650 CE. Moreover, an analysis of dialectic diversity points to the southeast coast as the location where the first people landed and gradually dispersed across the rest of the country (see 252, 253). A genetic assessment indicated approximately equal African and Indonesian contributions to both paternal and maternal Malagasy lineages. The most likely origin of the Asia-derived paternal lineages of the Malagasy is Borneo. This agrees with the linguistic indication that the languages spoken around the Barito River in southern Borneo are the closest extant relatives of Malagasy languages (253). One assessment of archeological butchery sites in Madagascar showed anthropogenic perimortem modification of bones directly dated at 10,000 BP as the earliest indication of humans in Madagascar (251). Other archaeological and genetic evidence suggests human occupation of Madagascar by 6000 years (251) and certainly by at least 2000 BP (254).

A recent study of the genomic landscape of human diversity across Madagascar indicates that “The origins of the Malagasy raise questions about ancient connections between continents; moreover, because ancestors are fundamental to Malagasy society, Malagasy origins are also a heated topic around the country, with numerous proposed hypotheses. This study provides a comprehensive view of genomic diversity (including maternal lineages, paternal lineages, and genome-wide data) based on a sampling of 257 villages across Madagascar. The observed spatial patterns lead to a scenario of a recent and sex-biased admixture between Bantu and Austronesian ancestors across the island. Moreover, we find geographical influences creating subtle signals of genetic structure that are independent of the Bantu/Austronesian admixture, suggesting that recent history has a role in the genomic diversity of the Malagasy” (254).

Currently, Madagascar has *ca* 28 million people (61% found in rural areas) composed of 18 Malagasy ethnic community groups, collectively known as Malagasy. Merina, a Malayo-Indonesian community the largest group (23% of the population), followed by the Betsileo (12% of the population), and the Côtier (a collective term for coastal communities, predominantly of mixed African, Malayo-Indonesian, and Arab descent), with smaller minorities of Comorans, Creole, French and Indians (255). Madagascar accounts for 50% of primate species in the Afrotropics and 21% of the world’s primate species. All species present ( $n = 107$ ) in Madagascar are endemic to the island. The IUCN lists 95% of Malagasy primates as threatened with extinction and 100% have decreasing populations. This extinction crisis exists in Madagascar even though *ca* 86% of Malagasy primate species have at least part of their ranges located in protected areas. (Table S8; 3). In Madagascar, major anthropogenic threats to primate populations include shifting agriculture, hunting, mining, and quarrying, smallholder grazing, housing, and urban expansion, and agro-industry farming (3). Sixty percent of the Malagasy people live in rural areas (44, 255), and the population is expected to double from 27.7 million people in 2020 to 54 million by 2050, and then double again to *ca* 100 million by 2100 (World Population Prospects, <https://population.un.org/wpp/>; 9, 10). Today only 10% of the original forests of Madagascar remain. We estimated that the primate range in Madagascar encompasses an area of 469,831 km<sup>2</sup> or approximately 80% of Madagascar’s land area (*ca* 587,041 km<sup>2</sup>; Table S1). While the land area of continental sub-Saharan Africa covers *ca* 24 million km<sup>2</sup> and harbors 107 primate species, the same number of species are present in Madagascar across an area that is only 2% of the land area of Sub-Saharan Africa (44, 255). Given high levels of poverty, rapid

population increase, and food insecurity, there exists continued pressure in Madagascar to convert its remaining natural habitat to monocultures and for people to hunt. A recent study found that alternative sources of fat and protein such as raising poultry and sustainably harvesting native species of insects may offer the best solution to reducing food insecurity and promoting lemur conservation in Madagascar (92).

### **Source of primate species geographic ranges, conservation status, and population status**

Primate taxonomy and species geographic ranges were obtained from the IUCN Red List (3). These data have limitations associated with under- and overestimations of species ranges or the true area of occupancy due to commission errors. These are minimized as long as the focus is on species assemblages at broad spatial scales instead of single species (256).

Species lists and conservation and population status data follow the IUCN Red List (3). We built density plots to visualize the relationships between species richness and Indigenous Peoples' lands (IPLs), protected areas (PAs), and other lands (OLs). Analyses were done in R (257-260). Raw data are available in Supplementary Tables S3-S6.

### **Spatial analysis**

Information on the geographic distribution and conservation status of living primates was obtained from the IUCN Red List, 2020-3 (<https://www.iucnredlist.org/>) and from (4). For purposes of this evaluation, we considered the following regions as discrete entities due to their geographic separation, and unique flora and fauna, and the fact that they harbor the sum total of the world's extant primates: Neotropics (21 countries and 177 primate species), mainland Africa (45 countries and 107 primate species), Madagascar (107 primate species) and the Indo-Malay realm (23 countries and 123 primate species). We obtained spatial information to estimate the global extent (km<sup>2</sup>) and overlap of primate species range distributions on Indigenous Peoples' lands, Protected Areas, and other lands from the IUCN Red List ([www.iucnredlist.org](http://www.iucnredlist.org)), the UN Environment Programme World Conservation Monitoring Centre (UNEP-WCMC; [unep-wcmc.org](http://unep-wcmc.org)) and the Protected Planet ([www.protectedplanet.net](http://www.protectedplanet.net)). The category "other lands" may include non-indigenous community land and PAs that are not included in the WDPA and (22).

We combined this information to evaluate the degree to which different land management practices (Indigenous, Government protected, and Nonprotected) across the Neotropics, Afrotropic, and Indo-Malayan realms related to the conservation status of primate species and their richness. The conservation and population status for each primate species were obtained from IUCN Red List ([www.iucnredlist.org](http://www.iucnredlist.org)). We defined species richness as the overlap of the polygons describing the geographic distributions of all primate species onto grid cells of 0.5° resolution of latitude and longitude. We used Euler plots (<https://cran.r-project.org/web/packages/eulerr/vignettes/introduction.html>) to illustrate the magnitude of the spatial intersections between Indigenous Peoples' lands and Protected Areas within the global primate range and for each ecoregion where primates are naturally found. To estimate of the geographic overlap of primate distributions, Indigenous Peoples' lands, and protected areas, we used the contour of the global distribution of primates to clip the areas (IPLs and PAs) within the primates' geographical distribution. Then, for each region (i.e., Neotropics, mainland Africa, Madagascar, and Indo-Malay realm), we calculated the extent of primate

distributions on IPLs, PAs, and Other lands (OLs). We built this map with the packages `rgdal` (258), `raster` (259), and `ggplot2` (260) in the R environment (257).

### **Strengths and limitations of using the IUCN database**

Brooks et al., (49) advocate using the area of suitable habitat (AOH) rather than the extent of occurrence (EOO) or area of occupancy (AOO) in spatial analyses. AOH is a measure of landcover, elevation, and the availability of habitat types suitable for a species to exploit, in determining species' distributions. A previous study modeling species richness of 5,027 terrestrial mammals reported that the estimated AOH was on average, one-third less than the value estimated using the EOO (261). However, areas of relatively intact tropical forest, like those used by the majority of primate species showed the lowest differences between EOO and AOH (261). In addition, estimates of EOO do not appear to be subject to high omission errors. For example, 95% of the known occurrence of 4500 amphibian species examined in a recent study fell within or immediately adjacent to their mapped distribution (262). Similarly, the IUCN distribution maps of terrestrial avian, mammalian, and amphibian species have been shown to be robust to commission errors (i.e., the species is mapped as present in locations where it is in fact not present (261). Finally, we note that the IUCN data files have been used extensively in previous analyses (e.g., 262–264), including modeling the effectiveness of protected areas in representing biodiversity (265–270), and in examining patterns of bat diversity in Amazonian Indigenous lands (271). And, although we acknowledge that the IUCN spatial data may underestimate the extent of occurrence and overestimate the true area of species occupancy (49, 272), the processes used by the IUCN to estimate primate species distributions minimize these potential errors (50). That said, future studies will need to prioritize identifying the remaining area of suitable habitat (AOH) in order to obtain the most accurate estimate of a species current and future distribution. This is critical for management strategies designed to create corridors for dispersal, gene flow, and to reconnect isolated populations. AOH also provides a stronger measure of forest fragmentation, fragment size, and recent habitat loss, all of which affect species survivorship (49). For example, a recent study of the Endangered Guizhou snub-nosed monkey (*Rhinopithecus brelichi*) found that although the IUCN Red List indicates an AOO of 490-500 km<sup>2</sup> and an EOO of 514 km<sup>2</sup>, fine-scale mapping indicates a remaining area of suitable habitat of only 134 km<sup>2</sup> (240). Moreover, due to forest fragmentation and infrastructure construction (aerial tram, roads) only 28 km<sup>2</sup> of suitable habitat is accessible to the monkeys. This underscores the importance of detailed field observations, ground-truthing, and fine-scale vegetation analysis in determining the area of accessible suitable habitat available for a given species.

**Euler plots in Fig. 4A.** For the Euler plots, we first obtained the area of each spatial feature (i.e., primate range, IPLs, and PAs) and their intersections. We did this using the R package `rgdal` (257). Then we used the R package `eulerr` (273) to obtain the plots for each region.

### **Estimates of primate species in Indigenous Peoples' lands (IPLs), protected areas (PAs), and other lands (OLs).**

To estimate the primate species richness inside IPLs, PAs, and OLs, we used an ensemble map containing all species ranges from the IUCN (3), then intersected it with the map of each area

type and obtained the number of species whose geographical distribution overlapped the set of polygons of each area type.

### **Assumptions tested in the spatial analysis**

(1) Indigenous Peoples' lands, in the Neotropics, mainland Africa, and the Indo-Malayan realm contain significantly more primate species than expected by chance in equal size areas randomly located across each ecoregion. The method used to test this assumption consisted of randomly placing the polygons of each area-type across each ecoregion. We repeated this procedure 999 times for each ecoregion. We then obtained a frequency distribution of species richness found in these random placements. This frequency distribution reflects the range of probabilities of finding patterns of species richness by a random geographic distribution of these areas. We then compared the observed richness in IPLs in each ecoregion with the distribution of richness obtained by chance for that ecoregion. We counted the number of times the random placement yielded a species richness equal to or higher than the actual richness pattern. This count provided the probability (i.e., *p-value*) of finding the observed species richness only by chance. A low probability (considering a significance level of 5%) indicates that the IPLs from that ecoregion have a higher species richness than expected by chance. We found a significantly higher species richness in IPLs in the Neotropics (*p-value* = 0.008) and Indo-Malayan region (*p-value* = 0.0), but not for mainland Africa (*p-value* = 1).

(2) We tested whether each species' distribution overlaps IPLs and PAs (divided into I-IV and V-VI categories) greater than expected by a random assignment of these areas across geographical space. For these analyses, we performed a spatial null model test in which we randomized - 999 times - the spatial position of the areas. We tested each area type (IPLs, PAs I-IV, and PAs V-VI) separately. We estimated the frequency distribution of the percentage of range overlap in these random areas for each species. From these randomly generated data, we estimated how many were higher than the actual overlap of the species. Each species was deemed highly (i.e., significantly) protected if its observed overlap with each area type was higher than 5% of those obtained by chance. This estimate gives the probability (i.e., the *p-value*) of finding the overlap between a species' distribution in IPLs, PAs, and OLs by chance.

### **Human Footprint and Linear infrastructure Density**

We compared the Human Footprint, a composite measure of human population density, roads, rail, and electrical power generating infrastructures, agricultural and pasture lands, and the built environment associated with cities and towns (159), both inside and outside Indigenous Peoples lands, as well as at buffer distances of 1-10 km, 10-25 km, and 25-50 km from the border of Indigenous Peoples' lands. This was accomplished by performing a two-way ANOVA, using "biogeographic realms" (Neotropics, Afrotropics and Indo-Malayan realm) and 'Zone' (IPL, Buffer distances) as predictors, and a one-way ANOVA for each realm using 'Zone' as a single predictor. ANOVAs were complemented with Tukey tests with adjusted *p-values*.

Information on linear infrastructures (roads and railroads) throughout the Brazilian Amazon was used to construct Fig. 6B. This was accomplished by retrieving data from OpenStreetMap (OSM; [www.openstreetmap.org](http://www.openstreetmap.org)) using a customized R script and the R package 'osmdata' (257). To determine infrastructure density, we obtained data from OSM of the infrastructure spatial lines for each 50 x 50 km grid inside this region, reprojected them to an equal-area projection, and summed the total length of all linear infrastructures.

### **Indigenous Peoples' traditional practices and primate conservation: hunting**

Results of biodemographic models predicting spider monkey densities in the Konashen Community-Owned Conservation Area (KCOCA), Guyana over the next 20 years are based on six scenarios of Indigenous Waiwai hunting (95; Fig. S6). Model parameters are based on empirically driven quantitative assessments of Waiwai hunting and current demographic trends (See 145). These model results show the importance of traditional hunting technology (e.g., bow and arrow versus shotgun) and the presence of unhunted “source” areas surrounding intensively hunted “sink” areas for sustainable hunting. While the most extreme scenario (bottom right) shows considerable depletion of spider monkey populations throughout the KCOCA, a more realistic scenario (middle left) predicts spider monkeys to be at carrying capacity throughout >90% of the KCOCA and an extinction radius (densities  $\leq$  10% of carrying capacity) of 7 km around the village of Masakenari (Fig. S1).

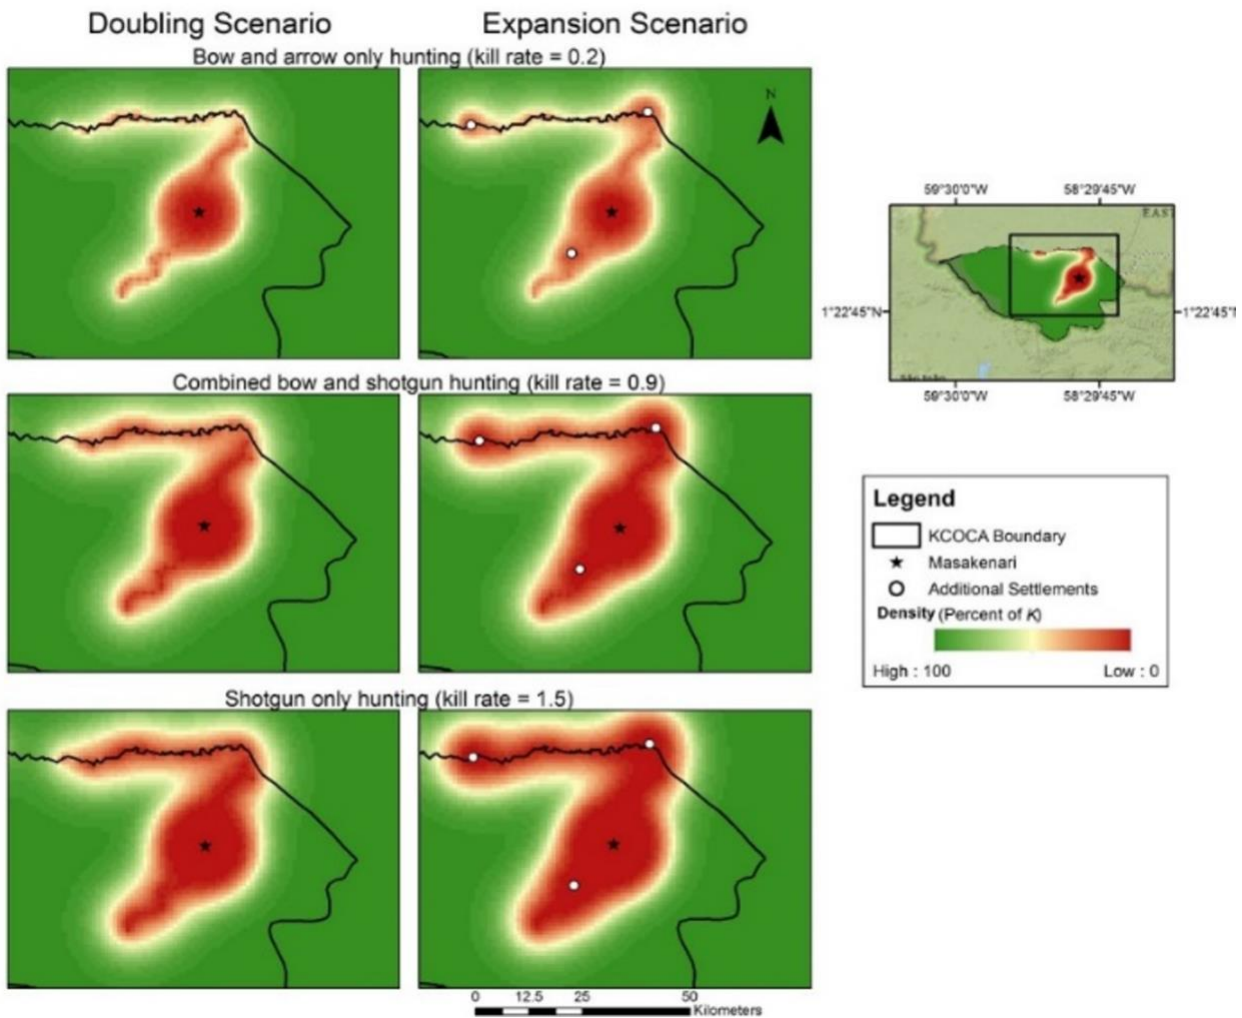

**Fig. S1. Biodemographic models, hunting by Indigenous Peoples, and primate densities on Indigenous Peoples' lands.** Results of biodemographic models predicting spider monkey densities in the Konashen Community Owned Conservation Area (KCOCA), Guyana in 20 years based on six scenarios of Indigenous Waiwai hunting (95). Model parameters are based on empirically derived quantitative assessments of Waiwai hunting and current demographic trends (95, 146). The primary Waiwai village of Masakenari is predicted to grow from 225 to 500 individuals in the scenarios on the right (the “doubling” scenario), while images on the left depict the “Expansion” scenario, where the total population of the KCOCA grows to 500 people and additional settlements are formed in areas that are currently household farms. The top row shows a bow only technology scenario, the middle row shows a combination of bow and shotgun hunting, and the last row shows a shift to only shotgun hunting. These model results show the importance of traditional hunting technology (e.g., bow and arrow versus shotgun) and the presence of un hunted “source” areas surrounding intensively hunted “sink” areas for sustainable hunting.



A

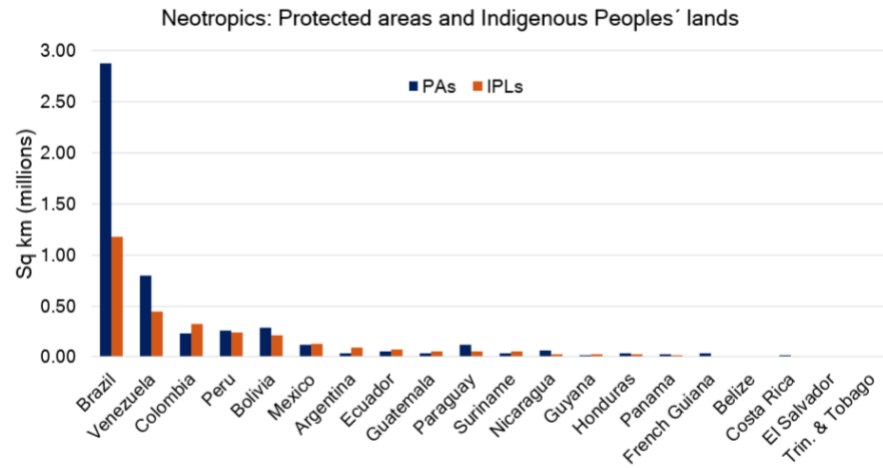

B

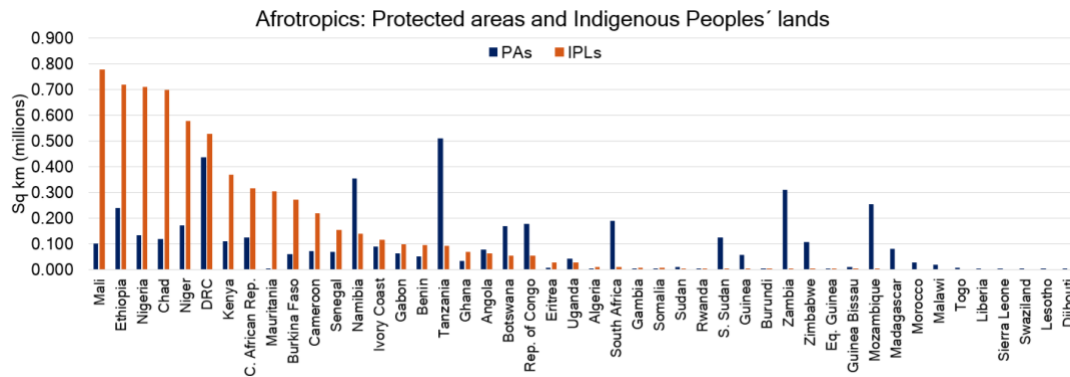

C

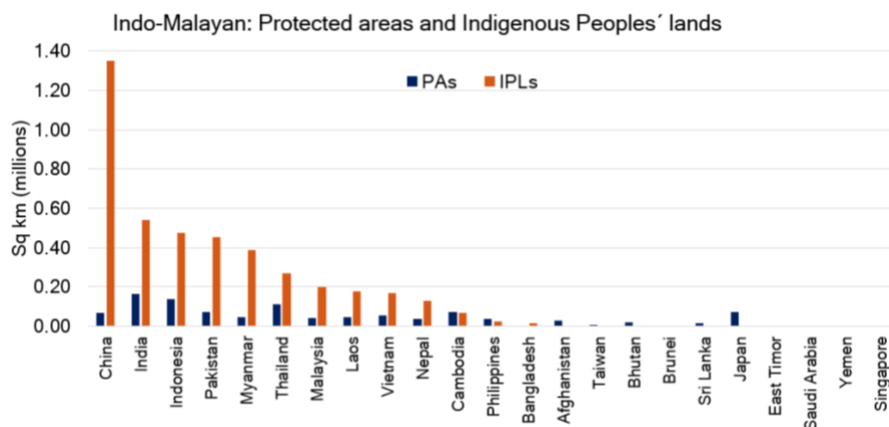

**Fig. S2. Protected areas and Indigenous Peoples' lands in primate range regions.** Extent of protected areas (PAs) and Indigenous Peoples' lands (IPLs) in (A) the Neotropics, (B) the Afrotropics and (C) the Indo-Malayan region. Countries ranked by the extent of Indigenous Peoples' lands in their territories. Original data in Table S1.

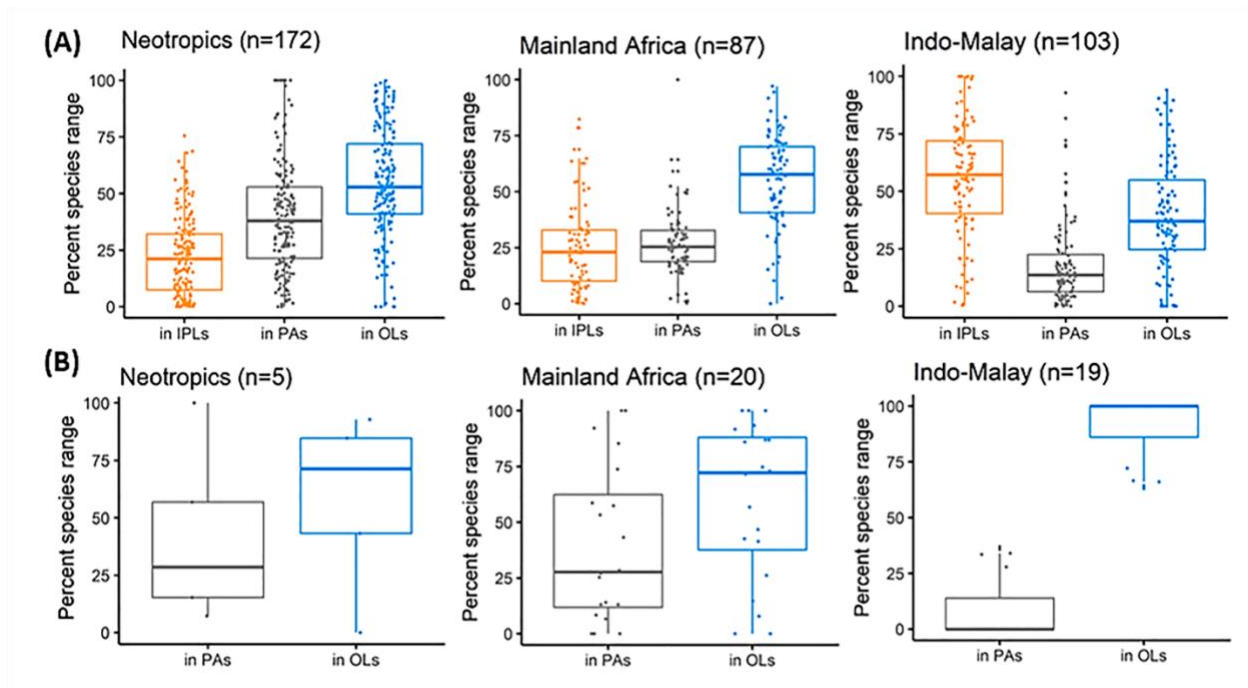

**Fig. S3. Primate species whose range intersects Indigenous Peoples' lands.** Boxplots showing (A) percent of primate species in each primate range region whose ranges intersect with Indigenous Peoples' lands (IPLs), protected areas (PAs) and other lands (OLs). (B) Global percent of primate species whose range do not intersect Indigenous Peoples' lands but intersect protected areas and other lands. Each boxplot contains 50% of the records and indicates the median value per area type (horizontal line) (see Tables S2-S5 for the species' lists).

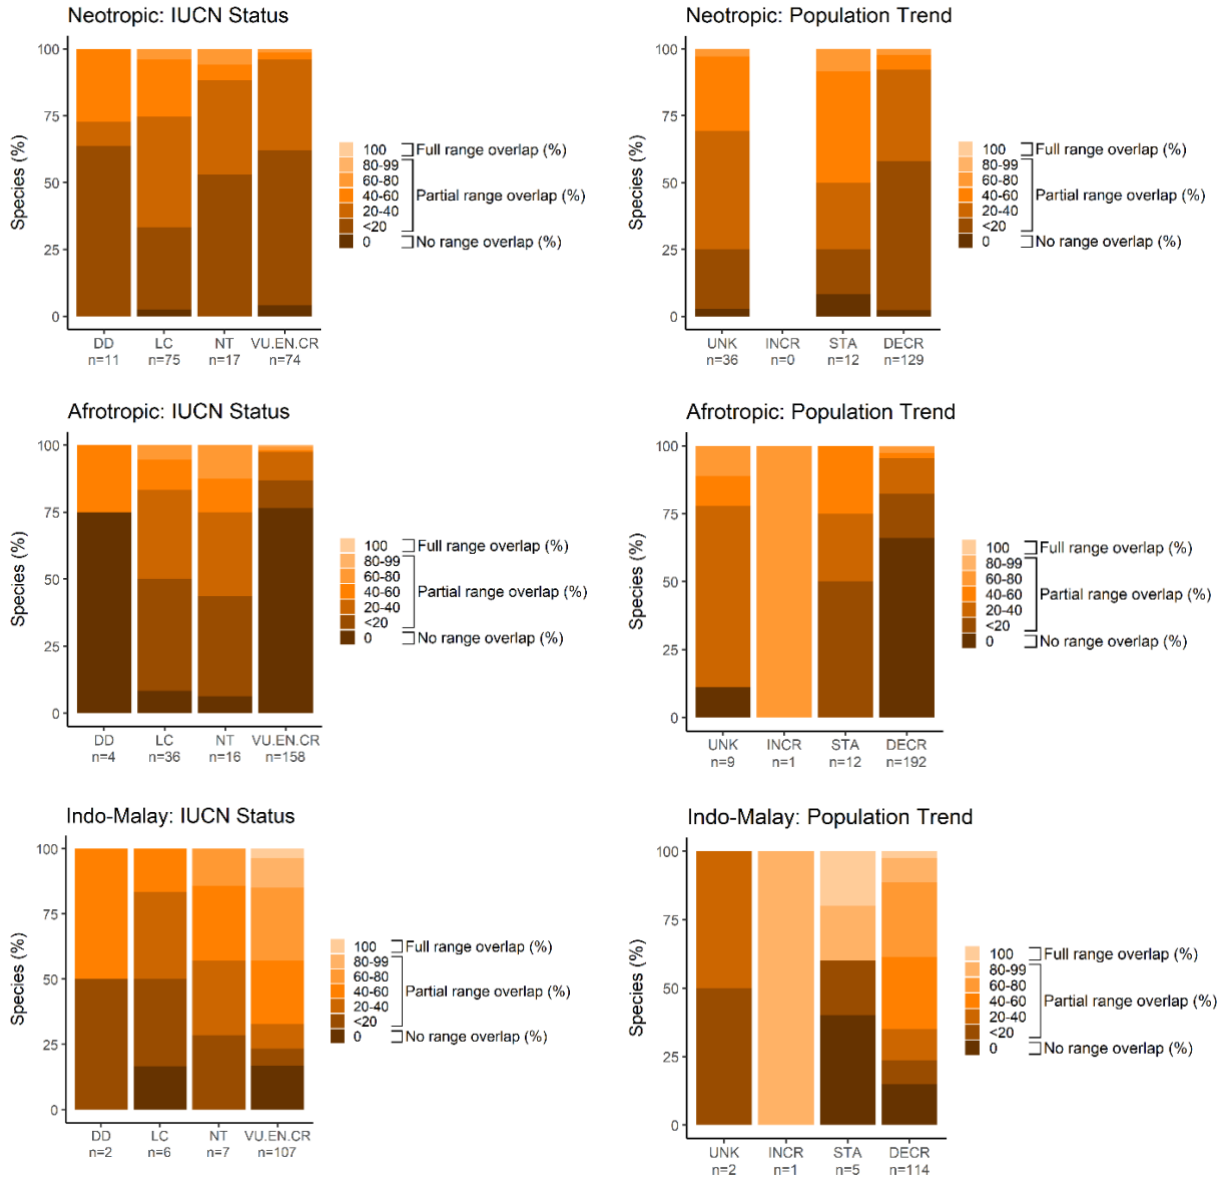

**Fig. S4. Conservation and population status of primate species inhabiting Indigenous Peoples' lands.** Left graphs: Percent of primate species with zero to 100% range overlap with Indigenous Peoples' lands and their IUCN conservation status. IUCN conservation categories: DD data deficient, LC least concerned, NT near threatened, VU vulnerable, EN endangered, CR critically endangered. These last three categories are grouped by the IUCN under the category Threatened. In the Neotropics, 15 species are classified as CR (Critically Endangered) on Indigenous Peoples' lands. In mainland Africa there are 4 CR species, and in the Indo-Malayan realm there are 18 CR species on Indigenous Peoples' lands. Right graphs: Percent of primate species with zero to 100% range overlap with Indigenous Peoples' lands and their IUCN population trend: UNK unknown, INCR increasing, STA stable, DECR decreasing. Afrotropics in both cases includes Madagascar. Source of IUCN data IUCN Red List (<https://www.iucnredlist.org/>, accessed July 2021). Numerical data in Tables S3-S7.

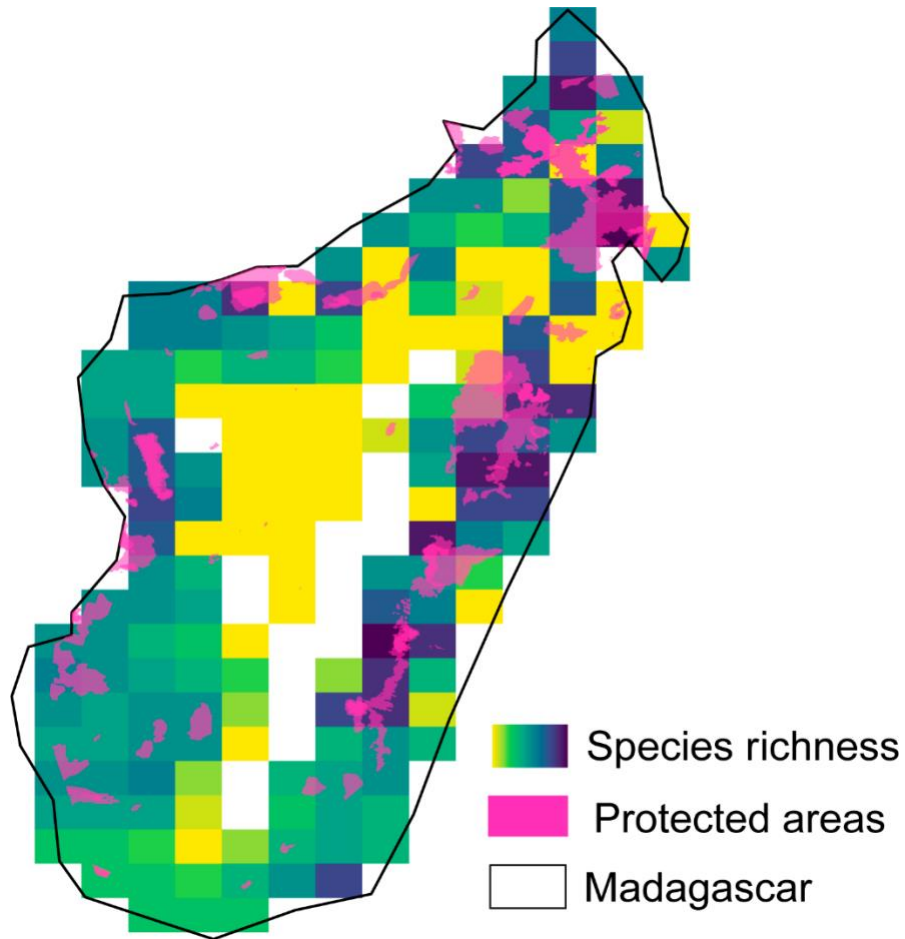

**Fig. S5. Geographic overlap between primate ranges and protected areas in Madagascar.** Source of the primate range data is the IUCN Red List (3; see Text S2). Source of locations of protected areas is from the Protected Planet (51). Extent of primate ranges *ca* 469,830 km<sup>2</sup>. Extent of protected areas is *ca* 80,199 km<sup>2</sup>. The resolution of the pattern of species richness (0.5°) is the same as in Fig 3.

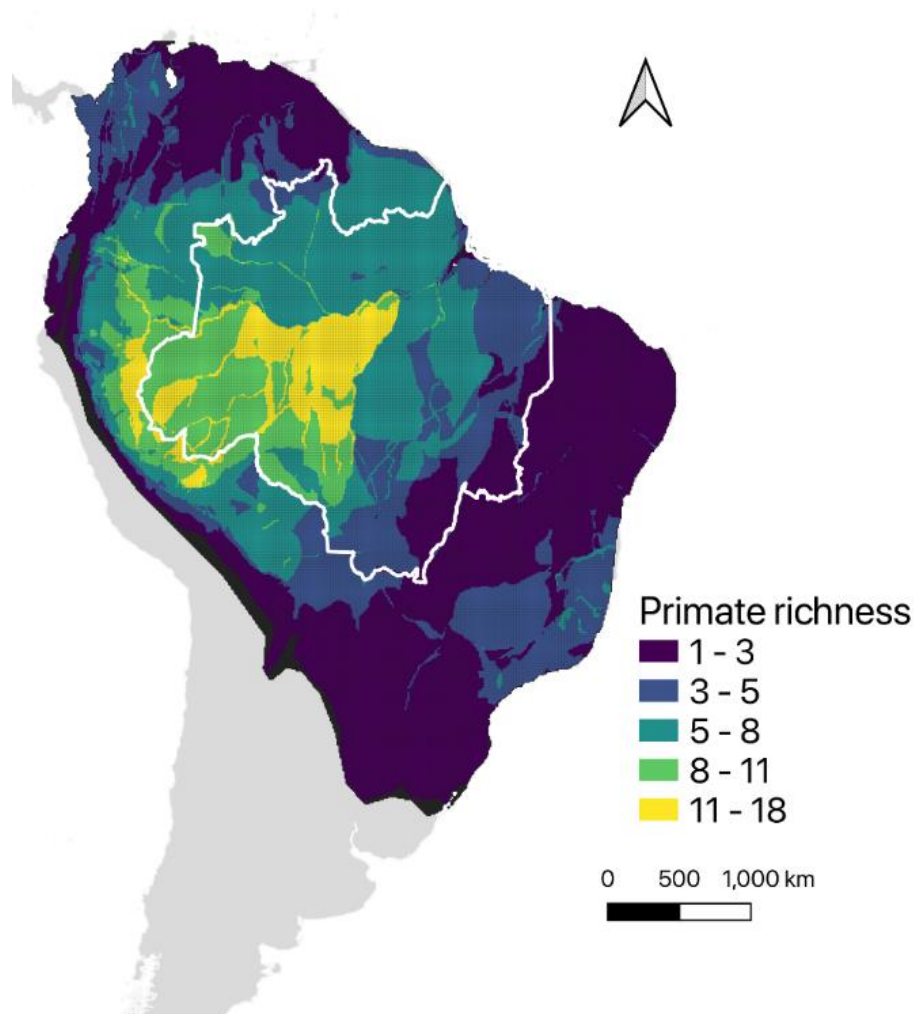

**fig. S6. Number of primate species for every 10x10km cell in South America.** Richness was based on overlapping IUCN species range polygons (URL: <https://www.iucnredlist.org/resources/spatial-data-download>, assessed June 2021). White polygon represents the Legal Amazonia (retrieved from TerraBrasilis URL: [terrabrasilis.dpi.inpe.br](http://terrabrasilis.dpi.inpe.br), accessed June 2021).

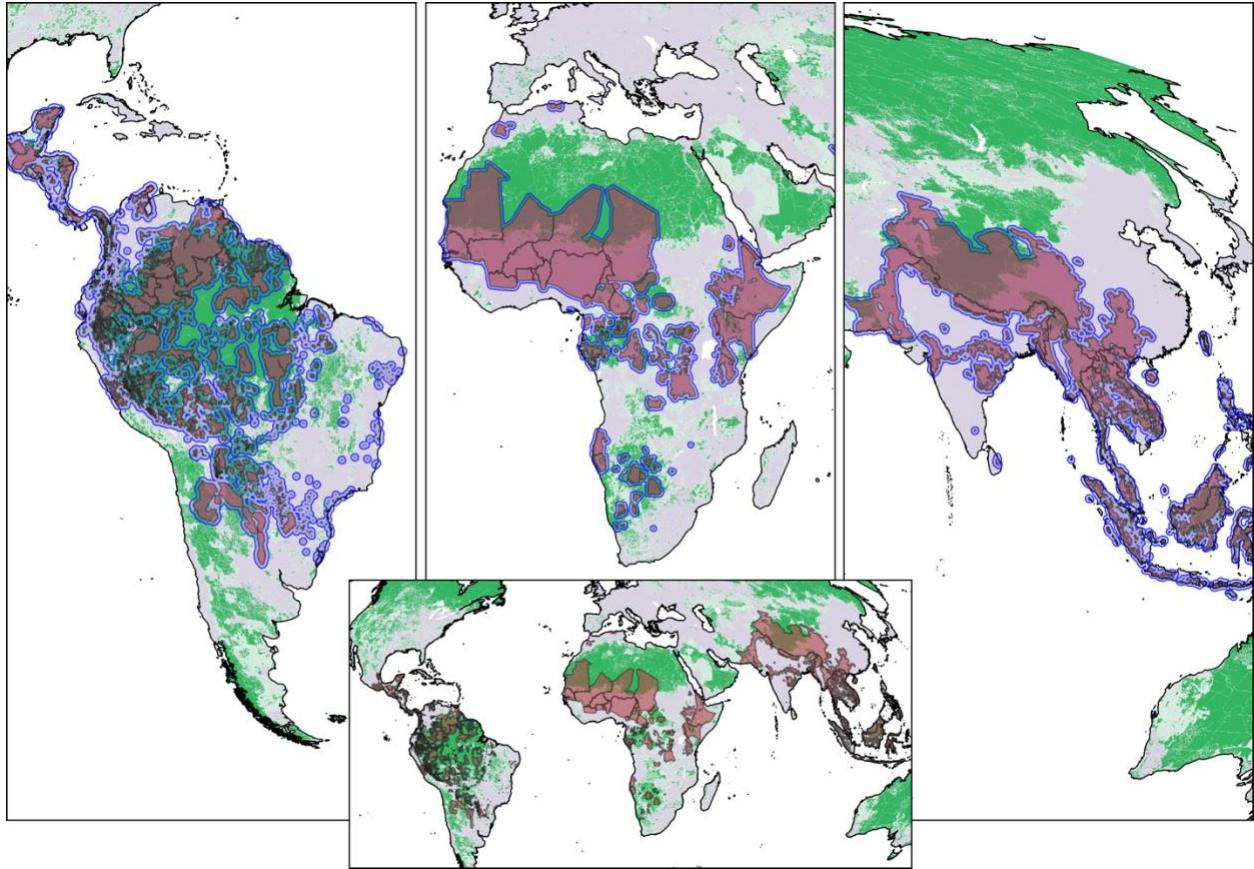

**Fig. S7. Distribution of 'Intact' land areas (Human Footprint <4) inside and within 50 km of the border of Indigenous Peoples' lands.** Areas in green represent intact habitats and areas in red denote Indigenous Peoples' Lands across the Neotropics (left), Africa (middle) and Indo-Malay realm (right). The purple areas depict a 50 km buffer zone surrounding Indigenous Peoples' Lands. The definition of intact lands follows *160* and *161*.

**Table S1. Primate range and Indigenous Peoples' lands in primate range countries.** Primate distributional range, Indigenous Peoples' lands protected areas, and other lands. Primate distributional range (km<sup>2</sup>) and the extent of primate ranges (prim) on Indigenous Peoples lands (IPLs), protected areas (PAs) and other lands (OLs) in countries in the Afrotropics, Neotropics Madagascar and in the Indo-Malay realm. Source of spatial data for primate range: IUCN Red List ([www.iucnredlist.org](http://www.iucnredlist.org)). Sources of spatial data of Indigenous Peoples lands: UN Environment Programme World Conservation Monitoring Centre (UNEP-WCMC; [unep-wcmc.org](http://unep-wcmc.org)) and Garnett et al. (22). Source of spatial data for protected areas: Protected Planet ([www.protectedplanet.net](http://www.protectedplanet.net)). Source of Primate species and percent Threatened: IUCN Red List ([www.iucnredlist.org](http://www.iucnredlist.org)). Summary statistics shown at the end of the table.

| Countries           | Primate range km <sup>2</sup> | IPLs km <sup>2</sup> | PAs km <sup>2</sup> | OLs km <sup>2</sup> | % primate range in IPLs | % primate range in PAs | % primate range in OLs | Number of species | % species IUCN Threatened (VU,EN,CR) |
|---------------------|-------------------------------|----------------------|---------------------|---------------------|-------------------------|------------------------|------------------------|-------------------|--------------------------------------|
| <b>AFROTROPICS</b>  |                               |                      |                     |                     |                         |                        |                        |                   |                                      |
| Algeria             | 26,234                        | 10,940               | 1,148               | 14,146              | 42                      | 4                      | 54                     | 1                 | 100                                  |
| Angola              | 1,230,225                     | 62,554               | 76,321              | 1,091,349           | 5                       | 6                      | 89                     | 23                | 22                                   |
| Benin               | 116,999                       | 94,790               | 51,060              | 28,852              | 81                      | 44                     | 25                     | 13                | 38                                   |
| Botswana            | 437,376                       | 53,724               | 168,167             | 215,485             | 12                      | 38                     | 49                     | 3                 | 0                                    |
| Burkina Faso        | 271,594                       | 271,594              | 60,764              | 50,764              | 100                     | 22                     | 19                     | 9                 | 33                                   |
| Burundi             | 26,239                        | 651                  | 1,051               | 24,538              | 2                       | 4                      | 94                     | 15                | 33                                   |
| Cameroon            | 460,308                       | 219,094              | 73,116              | 168,099             | 48                      | 16                     | 37                     | 32                | 31                                   |
| C. African Republic | 621,860                       | 315,230              | 125,273             | 181,358             | 51                      | 20                     | 29                     | 22                | 18                                   |
| Chad                | 748,602                       | 699,474              | 120,335             | 71,207              | 93                      | 16                     | 10                     | 5                 | 0                                    |
| Rep of the Congo    | 338,128                       | 53,227               | 176,888             | 108,013             | 16                      | 52                     | 32                     | 25                | 32                                   |
| DRC                 | 2,323,149                     | 527,803              | 438,130             | 1,357,216           | 23                      | 19                     | 58                     | 49                | 41                                   |
| Djibouti            | 19,478                        | 0                    | 89                  | 19,389              | 0                       | 0                      | 100                    | 2                 | 0                                    |
| Equatorial Guinea   | 24,531                        | 296                  | 5,323               | 18,913              | 1                       | 22                     | 77                     | 24                | 50                                   |
| Eritrea             | 108,364                       | 29,050               | 5,776               | 73,538              | 27                      | 5                      | 68                     | 4                 | 0                                    |
| Ethiopia            | 1,079,591                     | 720,496              | 240,234             | 118,861             | 67                      | 22                     | 11                     | 14                | 7                                    |
| Gabon               | 249,631                       | 99,482               | 64,069              | 86,081              | 40                      | 26                     | 34                     | 21                | 29                                   |
| Gambia              | 12,382                        | 7,116                | 1,303               | 3,963               | 57                      | 11                     | 32                     | 7                 | 14                                   |
| Ghana               | 209,318                       | 69,281               | 32,578              | 107,459             | 33                      | 16                     | 51                     | 17                | 41                                   |
| Guinea              | 239,565                       | 1,181                | 56,961              | 181,424             | 0                       | 24                     | 76                     | 16                | 38                                   |
| Guinea Bissau       | 27,982                        | 133                  | 9,081               | 18,767              | 0                       | 32                     | 67                     | 13                | 31                                   |
| Côte d'Ivoire       | 291,600                       | 117,130              | 89,291              | 85,180              | 40                      | 31                     | 29                     | 20                | 55                                   |
| Kenya               | 590,837                       | 370,638              | 108,626             | 111,574             | 63                      | 18                     | 19                     | 21                | 29                                   |
| Lesotho             | 1,464                         | 0                    | 702                 | 762                 | 0                       | 48                     | 52                     | 1                 | 0                                    |
| Liberia             | 48,365                        | 0                    | 4,928               | 43,437              | 0                       | 10                     | 90                     | 13                | 69                                   |
| Malawi              | 111,197                       | 0                    | 19,943              | 91,254              | 0                       | 18                     | 82                     | 7                 | 14                                   |

|              |           |         |         |         |    |    |    |    |     |
|--------------|-----------|---------|---------|---------|----|----|----|----|-----|
| Mali         | 798,108   | 781,137 | 99,939  | 82,968  | 98 | 13 | 10 | 7  | 43  |
| Mauritania   | 309,274   | 303,935 | 62      | 5,277   | 98 | 0  | 2  | 3  | 0   |
| Morocco      | 51,698    | 0       | 26,607  | 25,090  | 0  | 51 | 49 | 1  | 100 |
| Mozambique   | 766,855   | 56      | 255,842 | 510,956 | 0  | 33 | 67 | 9  | 11  |
| Niger        | 610,051   | 577,050 | 172,399 | 139,397 | 95 | 28 | 23 | 4  | 0   |
| Nigeria      | 901,369   | 711,567 | 134,783 | 55,019  | 79 | 15 | 6  | 27 | 48  |
| Rwanda       | 23,365    | 2,285   | 2,741   | 18,339  | 10 | 12 | 78 | 19 | 37  |
| South Sudan  | 624,909   | 1,323   | 124,223 | 499,363 | 0  | 20 | 80 | 12 | 17  |
| Senegal      | 174,484   | 152,994 | 67,898  | 46,409  | 88 | 39 | 27 | 11 | 9   |
| Sierra Leone | 62,105    | 0       | 4,056   | 58,049  | 0  | 7  | 93 | 16 | 38  |
| Somalia      | 310,098   | 5,536   | 369     | 304,194 | 2  | 0  | 98 | 9  | 0   |
| South Africa | 1,132,153 | 9,924   | 189,187 | 933,042 | 1  | 17 | 82 | 6  | 0   |
| Sudan        | 994,407   | 3,776   | 9,089   | 981,542 | 0  | 1  | 99 | 7  | 0   |
| Swaziland    | 18,119    | 0       | 1,836   | 16,283  | 0  | 10 | 90 | 4  | 0   |
| Tanzania     | 932,241   | 91,579  | 511,985 | 328,677 | 10 | 55 | 35 | 29 | 41  |
| Togo         | 60,064    | 0       | 8,126   | 51,938  | 0  | 14 | 86 | 13 | 31  |
| Uganda       | 245,769   | 28,135  | 43,661  | 173,973 | 11 | 18 | 71 | 20 | 30  |
| Zambia       | 751,921   | 407     | 310,932 | 440,583 | 0  | 41 | 59 | 11 | 9   |
| Zimbabwe     | 376,328   | 401     | 106,692 | 269,235 | 0  | 28 | 72 | 6  | 0   |
| Namibia      | 795,385   | 140,790 | 353,345 | 301,250 | 18 | 44 | 38 | 3  | 0   |

| Countries         | Primate range km <sup>2</sup> | Malagasy land area km <sup>2</sup> | PAs km <sup>2</sup> | OLs km <sup>2</sup> | % primate range in IPL | % primate range in PAs | % primate range in OLs | Number of species | % IUCN Threatened |
|-------------------|-------------------------------|------------------------------------|---------------------|---------------------|------------------------|------------------------|------------------------|-------------------|-------------------|
| <b>Madagascar</b> | 469,831                       | 389,960                            | 79,871              | 310,069             | 0                      | 17                     | 83                     | 107               | 96                |

| Countries         | Primate range km <sup>2</sup> | IPLs km <sup>2</sup> | PAs km <sup>2</sup> | OLs km <sup>2</sup> | % primate range in IPLs | % primate range in PAs | % primate range in OLs | Number of species | % IUCN Threatened |
|-------------------|-------------------------------|----------------------|---------------------|---------------------|-------------------------|------------------------|------------------------|-------------------|-------------------|
| <b>NEOTROPICS</b> |                               |                      |                     |                     |                         |                        |                        |                   |                   |
| Argentina         | 209,087                       | 90,205               | 34,649              | 84,234              | 43                      | 17                     | 40                     | 5                 | 20                |
| Belize            | 22,045                        | 7,437                | 8,505               | 6,104               | 34                      | 39                     | 28                     | 2                 | 100               |
| Bolivia           | 917,882                       | 209,908              | 289,129             | 418,845             | 23                      | 31                     | 46                     | 25                | 28                |
| Brazil            | 8,415,006                     | 1,174,900            | 2,873,779           | 4,366,327           | 14                      | 34                     | 52                     | 131               | 37                |
| Colombia          | 1,142,434                     | 320,873              | 231,843             | 589,718             | 28                      | 20                     | 52                     | 30                | 57                |
| Costa Rica        | 50,417                        | 5,884                | 18,821              | 25,712              | 12                      | 37                     | 51                     | 4                 | 100               |
| Ecuador           | 240,193                       | 73,249               | 56,582              | 110,362             | 30                      | 24                     | 46                     | 21                | 43                |
| El Salvador       | 12,728                        | 2,185                | 2,119               | 8,424               | 17                      | 17                     | 66                     | 1                 | 100               |
| French Guiana     | 74,672                        | 7,439                | 40,524              | 26,709              | 10                      | 54                     | 36                     | 10                | 10                |





**Table S2. Primate range and Indigenous Peoples' lands in the Neotropics.** Estimated distributional range and percentage of primate species in the Neotropics that overlaps with Indigenous Peoples lands (IPLs), protected areas (PAs) and other lands (OLs). Also shown are the IUCN conservation and population trend status for each species. Distributional range of each species is based on our estimates using the IUCN Red List spatial dataset. Source of conservation and population status is the IUCN Red list (<https://www.iucnredlist.org/>; last consulted 14-April-2021). Source of spatial data of Indigenous Peoples lands: UN Environment Programme World Conservation Monitoring Centre (22, 51). Note that the sum of percent values for a species range in IPLs, PAs, and OLs exceed 100% because IPLs and PAs may coincide partially or entirely with each other in geographical space.

| Species (n = 172)                 | Range (km <sup>2</sup> ) | % of range in IPLs | % of range in PAs | % of range in Ols | IUCN Status | IUCN Population trend |
|-----------------------------------|--------------------------|--------------------|-------------------|-------------------|-------------|-----------------------|
| <i>Lagothrix flavicauda</i>       | 24,210                   | 26.6               | 36.4              | 42                | <b>CR</b>   | <b>DECR</b>           |
| <i>Plecturocebus grovesi</i>      | 102,300                  | 16.9               | 18.6              | 81.6              | <b>CR</b>   | <b>DECR</b>           |
| <i>Plecturocebus oenanthe</i>     | 9,107                    | 11.8               | 1.5               | 86.8              | <b>CR</b>   | <b>DECR</b>           |
| <i>Ateles hybridus</i>            | 165,627                  | 9.7                | 44.3              | 59.5              | <b>CR</b>   | <b>DECR</b>           |
| <i>Cebus kaapori</i>              | 182,393                  | 6.4                | 21.4              | 78.6              | <b>CR</b>   | <b>DECR</b>           |
| <i>Cebus aequatorialis</i>        | 58,847                   | 5                  | 7.1               | 88                | <b>CR</b>   | <b>DECR</b>           |
| <i>Saguinus oedipus</i>           | 51,722                   | 3.5                | 15.1              | 83.6              | <b>CR</b>   | <b>DECR</b>           |
| <i>Saguinus bicolor</i>           | 20,258                   | 2.8                | 42.5              | 57.4              | <b>CR</b>   | <b>DECR</b>           |
| <i>Brachyteles arachnoides</i>    | 72,928                   | 0.9                | 53.9              | 46.6              | <b>CR</b>   | <b>DECR</b>           |
| <i>Sapajus xanthosternos</i>      | 457,791                  | 0.4                | 7.8               | 92.2              | <b>CR</b>   | <b>DECR</b>           |
| <i>Callicebus barbarabrownae</i>  | 129,698                  | 0.2                | 3.2               | 96.8              | <b>CR</b>   | <b>DECR</b>           |
| <i>Plecturocebus caquetensis</i>  | 1,361                    | 0.1                | 0                 | 99.9              | <b>CR</b>   | <b>DECR</b>           |
| <i>Brachyteles hypoxanthus</i>    | 95,640                   | 0.1                | 3                 | 97                | <b>CR</b>   | <b>DECR</b>           |
| <i>Plecturocebus vieirai</i>      | 900                      | 52.2               | 52                | 47.7              | <b>DD</b>   | <b>UNK</b>            |
| <i>Pithecia hirsuta</i>           | 169,430                  | 45.8               | 24.7              | 35.6              | <b>DD</b>   | <b>DECR</b>           |
| <i>Plecturocebus miltoni</i>      | 62,430                   | 43.9               | 65.3              | 37.1              | <b>DD</b>   | <b>UNK</b>            |
| <i>Pithecia vanzolinii</i>        | 49,144                   | 23.6               | 37.5              | 64.2              | <b>DD</b>   | <b>DECR</b>           |
| <i>Pithecia irrorata</i>          | 2,439,076                | 18.9               | 47.6              | 53.3              | <b>DD</b>   | <b>DECR</b>           |
| <i>Pithecia pissinattii</i>       | 154,321                  | 12.2               | 57.8              | 44.6              | <b>DD</b>   | <b>DECR</b>           |
| <i>Pithecia isabela</i>           | 29,238                   | 7.7                | 100               | 0                 | <b>DD</b>   | <b>DECR</b>           |
| <i>Aotus jorgehernandezi</i>      | 1,186                    | 4.8                | 0                 | 95.2              | <b>DD</b>   | <b>UNK</b>            |
| <i>Mico marcai</i>                | 7,001                    | 4.1                | 32.8              | 67.2              | <b>DD</b>   | <b>DECR</b>           |
| <i>Pithecia cazuzai</i>           | 10,071                   | 1.7                | 100               | 1.2               | <b>DD</b>   | <b>DECR</b>           |
| <i>Plecturocebus stephennashi</i> | 31,741                   | 1.4                | 62.3              | 37.8              | <b>DD</b>   | <b>UNK</b>            |
| <i>Ateles belzebuth</i>           | 815,705                  | 50.6               | 89                | 25                | <b>EN</b>   | <b>DECR</b>           |
| <i>Alouatta pigra</i>             | 231,456                  | 49.1               | 48.7              | 17.6              | <b>EN</b>   | <b>DECR</b>           |
| <i>Ateles geoffroyi</i>           | 802,879                  | 33.9               | 35.3              | 43                | <b>EN</b>   | <b>DECR</b>           |
| <i>Cebus malitiosus</i>           | 3,002                    | 33.2               | 27.6              | 60.4              | <b>EN</b>   | <b>DECR</b>           |

|                                   |           |      |      |      |    |      |
|-----------------------------------|-----------|------|------|------|----|------|
| <i>Ateles marginatus</i>          | 524,100   | 27.8 | 60   | 40.1 | EN | DECR |
| <i>Ateles chamek</i>              | 2,602,958 | 25.6 | 43.1 | 51   | EN | DECR |
| <i>Aotus miconax</i>              | 27,619    | 23.5 | 32.7 | 48.3 | EN | DECR |
| <i>Ateles fusciceps</i>           | 205,110   | 16.1 | 18.9 | 71.7 | EN | DECR |
| <i>Plecturocebus modestus</i>     | 6,540     | 15.2 | 13.2 | 74.6 | EN | DECR |
| <i>Cebus cesarae</i>              | 42,864    | 14.7 | 13.8 | 79.8 | EN | DECR |
| <i>Saimiri oerstedii</i>          | 6,830     | 7.6  | 22.3 | 72   | EN | DECR |
| <i>Chiropotes satanas</i>         | 264,249   | 7.3  | 20.4 | 79.6 | EN | DECR |
| <i>Leontopithecus chrysomelas</i> | 16,762    | 3.4  | 14.6 | 85.4 | EN | DECR |
| <i>Saimiri vanzolinii</i>         | 2,931     | 2.4  | 100  | 3.6  | EN | DECR |
| <i>Sapajus flavius</i>            | 13,880    | 2    | 6.2  | 93.6 | EN | DECR |
| <i>Cebus versicolor</i>           | 129,601   | 1.3  | 13.1 | 85.6 | EN | DECR |
| <i>Callithrix aurita</i>          | 155,937   | 0.3  | 24.6 | 75.6 | EN | DECR |
| <i>Leontopithecus chrysopygus</i> | 63,671    | 0.2  | 19.1 | 81.1 | EN | DECR |
| <i>Callicebus coimbrai</i>        | 34,987    | 0.1  | 1.2  | 98.8 | EN | DECR |
| <i>Sapajus robustus</i>           | 215,624   | 0.1  | 5.3  | 94.7 | EN | DECR |
| <i>Saguinus inustus</i>           | 380,407   | 68.7 | 84.7 | 0    | LC | STA  |
| <i>Cebus albifrons</i>            | 374,884   | 64.2 | 85.2 | 18   | LC | DECR |
| <i>Cheracebus lugens</i>          | 913,301   | 61.4 | 79.6 | 19.3 | LC | UNK  |
| <i>Leontocebus cruzlimai</i>      | 42,374    | 59.7 | 71.4 | 28.5 | LC | UNK  |
| <i>Cacajao melanocephalus</i>     | 473,238   | 56   | 80.5 | 1.5  | LC | STA  |
| <i>Aotus trivirgatus</i>          | 752,045   | 55.9 | 97.5 | 20.2 | LC | DECR |
| <i>Pithecia napensis</i>          | 151,358   | 54.6 | 14.2 | 38.9 | LC | DECR |
| <i>Cebus olivaceus</i>            | 935,399   | 51.3 | 69.4 | 34.4 | LC | STA  |
| <i>Cebus brunneus</i>             | 1,430     | 51.3 | 100  | 0    | LC | UNK  |
| <i>Cheracebus regulus</i>         | 221,340   | 49.8 | 63.9 | 34.3 | LC | UNK  |
| <i>Saimiri cassiquiarensis</i>    | 1,833,420 | 47.5 | 62.3 | 26.5 | LC | UNK  |
| <i>Leontocebus fuscus</i>         | 116,300   | 46.8 | 40.9 | 21.3 | LC | UNK  |
| <i>Chiropotes chiropotes</i>      | 1,363,927 | 45.8 | 83.3 | 25.1 | LC | STA  |
| <i>Leontocebus nigrifrons</i>     | 48,161    | 45.3 | 18.8 | 46.9 | LC | STA  |
| <i>Alouatta macconnelli</i>       | 1,720,685 | 44   | 77   | 29.9 | LC | STA  |
| <i>Mico intermedius</i>           | 62,624    | 43.2 | 65.1 | 37.4 | LC | DECR |
| <i>Aotus vociferans</i>           | 1,054,333 | 42   | 58.8 | 19.6 | LC | UNK  |
| <i>Cheracebus lucifer</i>         | 253,308   | 41   | 34.5 | 33.6 | LC | UNK  |
| <i>Mico saterei</i>               | 19,281    | 40.5 | 49.9 | 50.2 | LC | UNK  |
| <i>Leontocebus lagonotus</i>      | 200,103   | 38.5 | 14.5 | 49.8 | LC | UNK  |
| <i>Plecturocebus urubambensis</i> | 21,639    | 36.8 | 84.8 | 0    | LC | UNK  |
| <i>Plecturocebus aureipalatii</i> | 58,372    | 34.9 | 29   | 44.4 | LC | STA  |
| <i>Saguinus mystax</i>            | 589,295   | 34.4 | 46.5 | 48.6 | LC | DECR |
| <i>Plecturocebus discolor</i>     | 356,789   | 34.2 | 30.4 | 41.1 | LC | UNK  |
| <i>Alouatta juara</i>             | 2,335,697 | 33.1 | 44.6 | 39.8 | LC | UNK  |

|                                   |           |      |      |      |    |      |
|-----------------------------------|-----------|------|------|------|----|------|
| <i>Plecturocebus cupreus</i>      | 776,067   | 32.5 | 43.4 | 51.4 | LC | UNK  |
| <i>Alouatta seniculus</i>         | 2,266,187 | 32   | 42.3 | 38.6 | LC | DECR |
| <i>Mico emiliae</i>               | 151,987   | 31.6 | 40.9 | 59   | LC | UNK  |
| <i>Cheracebus torquatus</i>       | 247,898   | 31.4 | 100  | 14   | LC | UNK  |
| <i>Pithecia monachus</i>          | 196,622   | 31.2 | 38.4 | 49.4 | LC | DECR |
| <i>Plecturocebus bernhardi</i>    | 119,558   | 29.7 | 52.9 | 47.3 | LC | STA  |
| <i>Leontocebus leucogenys</i>     | 106,104   | 29.4 | 17.5 | 54.1 | LC | UNK  |
| <i>Chiropotes sagulatus</i>       | 824,347   | 28.9 | 60.8 | 32.9 | LC | UNK  |
| <i>Plecturocebus donacophilus</i> | 163,768   | 28.8 | 37.3 | 54.8 | LC | UNK  |
| <i>Sapajus apella</i>             | 5,931,508 | 27.9 | 47.1 | 44.3 | LC | DECR |
| <i>Saguinus midas</i>             | 841,586   | 27.8 | 58.5 | 35   | LC | STA  |
| <i>Leontocebus fuscicollis</i>    | 413,459   | 27.8 | 45.8 | 53.5 | LC | DECR |
| <i>Pithecia pithecia</i>          | 857,034   | 27.2 | 50.2 | 41.4 | LC | DECR |
| <i>Saguinus melanoleucus</i>      | 59,668    | 26.8 | 40.2 | 57.5 | LC | DECR |
| <i>Leontocebus nigricollis</i>    | 211,768   | 26.6 | 26.4 | 53.6 | LC | DECR |
| <i>Saimiri sciureus</i>           | 936,368   | 26.1 | 58   | 36   | LC | DECR |
| <i>Cebus castaneus</i>            | 279,172   | 26   | 31.7 | 52.8 | LC | UNK  |
| <i>Plecturocebus moloch</i>       | 944,034   | 24.9 | 44.5 | 55.4 | LC | UNK  |
| <i>Pithecia inusta</i>            | 139,352   | 24.1 | 26.4 | 57.4 | LC | DECR |
| <i>Saimiri boliviensis</i>        | 1,371,286 | 23.2 | 37.1 | 52.9 | LC | DECR |
| <i>Saguinus imperator</i>         | 234,321   | 23.1 | 42.7 | 49.8 | LC | DECR |
| <i>Plecturocebus pallescens</i>   | 323,675   | 23   | 52.8 | 41.2 | LC | DECR |
| <i>Plecturocebus cinerascens</i>  | 210,385   | 22.7 | 55.3 | 45.4 | LC | UNK  |
| <i>Aotus nigriceps</i>            | 1,569,879 | 21.3 | 45.1 | 52.5 | LC | UNK  |
| <i>Leontocebus weddelli</i>       | 601,318   | 21.2 | 46.1 | 46.7 | LC | UNK  |
| <i>Aotus azarae</i>               | 3,145,681 | 19.5 | 34.9 | 61.1 | LC | DECR |
| <i>Plecturocebus toppini</i>      | 291,716   | 16.4 | 45.6 | 49.9 | LC | DECR |
| <i>Pithecia chrysocephala</i>     | 114,365   | 16.1 | 64.1 | 34.2 | LC | DECR |
| <i>Mico chrysoleucos</i>          | 36,453    | 15.9 | 35.1 | 64.8 | LC | DECR |
| <i>Alouatta arctoidea</i>         | 394,812   | 15.7 | 40   | 49.4 | LC | UNK  |
| <i>Plecturocebus dubius</i>       | 122,427   | 15.3 | 55.8 | 47.5 | LC | UNK  |
| <i>Saimiri collinsi</i>           | 907,130   | 14.6 | 37.4 | 62.5 | LC | DECR |
| <i>Saguinus labiatus</i>          | 286,447   | 11.1 | 53   | 48   | LC | DECR |
| <i>Sapajus cay</i>                | 618,153   | 10.8 | 15.7 | 77.4 | LC | DECR |
| <i>Alouatta nigerrima</i>         | 236,116   | 10.7 | 52.8 | 47.3 | LC | DECR |
| <i>Plecturocebus baptista</i>     | 14,741    | 10.4 | 10.5 | 89.5 | LC | STA  |
| <i>Pithecia aequatorialis</i>     | 45,738    | 10.2 | 31.9 | 59.9 | LC | DECR |
| <i>Plecturocebus caligatus</i>    | 73,487    | 9    | 42.7 | 56.7 | LC | UNK  |
| <i>Mico argentatus</i>            | 137,206   | 8.5  | 30.9 | 69.4 | LC | DECR |
| <i>Plecturocebus hoffmannsi</i>   | 92,128    | 7.4  | 54.7 | 46.1 | LC | UNK  |
| <i>Cheracebus purinus</i>         | 152,853   | 6.9  | 22.1 | 77.9 | LC | STA  |

|                                |           |      |      |      |    |      |
|--------------------------------|-----------|------|------|------|----|------|
| <i>Pithecia albicans</i>       | 63,174    | 3.5  | 18.2 | 81.9 | LC | DECR |
| <i>Callithrix penicillata</i>  | 1,309,808 | 2    | 10.1 | 90.7 | LC | DECR |
| <i>Callibella humilis</i>      | 25,729    | 1.6  | 43   | 56.9 | LC | UNK  |
| <i>Callithrix jacchus</i>      | 927,369   | 1.1  | 12   | 88.1 | LC | DECR |
| <i>Mico leucippe</i>           | 14,839    | 1    | 47.4 | 52.4 | LC | DECR |
| <i>Callithrix geoffroyi</i>    | 111,835   | 0.2  | 4.9  | 95.1 | LC | DECR |
| <i>Mico mauesi</i>             | 29,586    | 0.1  | 74.9 | 25.1 | LC | UNK  |
| <i>Leontocebus tripartitus</i> | 25,700    | 67.9 | 45.6 | 13.9 | NT | DECR |
| <i>Mico nigriceps</i>          | 63,293    | 52.3 | 76.5 | 24.3 | NT | DECR |
| <i>Saguinus geoffroyi</i>      | 117,043   | 38.9 | 32.2 | 50.1 | NT | DECR |
| <i>Plecturocebus parecis</i>   | 58,031    | 38.6 | 38.7 | 61.2 | NT | DECR |
| <i>Cebus yuracus</i>           | 480,016   | 36.2 | 29.8 | 41.1 | NT | DECR |
| <i>Aotus zonalis</i>           | 132,387   | 26.6 | 24.9 | 60.8 | NT | UNK  |
| <i>Alouatta sara</i>           | 341,403   | 25.6 | 30.8 | 57.8 | NT | DECR |
| <i>Cebus cuscinus</i>          | 208,799   | 22.8 | 41.1 | 37.9 | NT | DECR |
| <i>Saimiri ustus</i>           | 1,753,420 | 19.2 | 49.3 | 53.2 | NT | DECR |
| <i>Leontocebus illigeri</i>    | 80,567    | 16.7 | 69   | 23.9 | NT | DECR |
| <i>Mico melanurus</i>          | 769,939   | 15.2 | 34.3 | 60.6 | NT | DECR |
| <i>Mico humeralifer</i>        | 63,580    | 12.7 | 58.4 | 43.3 | NT | DECR |
| <i>Saguinus martinsi</i>       | 84,218    | 11.7 | 35.9 | 59.8 | NT | DECR |
| <i>Alouatta caraya</i>         | 3,046,347 | 8.6  | 16.1 | 80.4 | NT | DECR |
| <i>Sapajus libidinosus</i>     | 5,213,330 | 4.8  | 12.6 | 87.8 | NT | DECR |
| <i>Sapajus nigritus</i>        | 1,748,229 | 3.1  | 12   | 86.1 | NT | DECR |
| <i>Callicebus nigrifrons</i>   | 488,536   | 0.2  | 14.7 | 85.4 | NT | DECR |
| <i>Cacajao hosomi</i>          | 69,745    | 75.5 | 100  | 76.9 | VU | DECR |
| <i>Cebuella pygmaea</i>        | 497,081   | 39   | 27.1 | 41.6 | VU | DECR |
| <i>Cacajao calvus</i>          | 210,952   | 38.8 | 27.7 | 50   | VU | DECR |
| <i>Aotus nancymaeae</i>        | 509,598   | 38.1 | 46   | 41   | VU | DECR |
| <i>Lagothrix lagothricha</i>   | 2,573,664 | 33.6 | 44.5 | 41.1 | VU | DECR |
| <i>Callimico goeldii</i>       | 602,353   | 30.2 | 32.7 | 45.8 | VU | DECR |
| <i>Cebus leucocephalus</i>     | 120,545   | 28.6 | 100  | 12.8 | VU | DECR |
| <i>Alouatta discolor</i>       | 375,751   | 27.6 | 59.3 | 41   | VU | DECR |
| <i>Ateles paniscus</i>         | 909,835   | 26.9 | 57.5 | 36.4 | VU | DECR |
| <i>Cebuella niveiventris</i>   | 1,180,127 | 26.2 | 45.7 | 49.5 | VU | DECR |
| <i>Cebus imitator</i>          | 233,502   | 26   | 49.4 | 44.5 | VU | DECR |
| <i>Chiropotes utahickae</i>    | 352,115   | 24.2 | 30.8 | 68.6 | VU | DECR |
| <i>Cebus unicolor</i>          | 1,403,481 | 23.6 | 43.7 | 52.6 | VU | DECR |
| <i>Mico munduruku</i>          | 53,302    | 23.3 | 91.3 | 8.6  | VU | DECR |
| <i>Chiropotes albinasus</i>    | 981,562   | 23.1 | 49.2 | 51   | VU | DECR |
| <i>Alouatta puruensis</i>      | 1,044,791 | 21.6 | 47.3 | 54.5 | VU | DECR |
| <i>Alouatta palliata</i>       | 484,431   | 21.2 | 32.3 | 59.4 | VU | DECR |

|                               |           |      |      |      |           |             |
|-------------------------------|-----------|------|------|------|-----------|-------------|
| <i>Pithecia rylandsi</i>      | 123,056   | 20.9 | 26.6 | 67.1 | <b>VU</b> | <b>DECR</b> |
| <i>Pithecia mittermeieri</i>  | 1,665,803 | 20.4 | 44.6 | 57.6 | <b>VU</b> | <b>DECR</b> |
| <i>Plecturocebus brunneus</i> | 184,935   | 20.3 | 47.9 | 61.5 | <b>VU</b> | <b>DECR</b> |
| <i>Saguinus niger</i>         | 279,941   | 19.1 | 41.6 | 57.8 | <b>VU</b> | <b>DECR</b> |
| <i>Alouatta belzebul</i>      | 1,685,177 | 17.1 | 35.1 | 64.6 | <b>VU</b> | <b>DECR</b> |
| <i>Pithecia milleri</i>       | 55,168    | 16.9 | 26.7 | 67.8 | <b>VU</b> | <b>DECR</b> |
| <i>Cebus capucinus</i>        | 193,355   | 15.8 | 19.8 | 71.4 | <b>VU</b> | <b>DECR</b> |
| <i>Cheracebus medemi</i>      | 15,663    | 10.1 | 27.6 | 63.7 | <b>VU</b> | <b>DECR</b> |
| <i>Aotus griseimembra</i>     | 233,276   | 9.7  | 33   | 68.7 | <b>VU</b> | <b>DECR</b> |
| <i>Aotus brumbacki</i>        | 123,964   | 8.6  | 7.5  | 84.1 | <b>VU</b> | <b>DECR</b> |
| <i>Saguinus ursulus</i>       | 310,920   | 8.6  | 19.8 | 80.4 | <b>VU</b> | <b>DECR</b> |
| <i>Mico rondoni</i>           | 141,152   | 5.7  | 21   | 78.9 | <b>VU</b> | <b>DECR</b> |
| <i>Aotus lemurinus</i>        | 177,192   | 4.5  | 27.3 | 69.4 | <b>VU</b> | <b>DECR</b> |
| <i>Callithrix kuhlii</i>      | 80,777    | 1.4  | 8.3  | 91.7 | <b>VU</b> | <b>DECR</b> |
| <i>Alouatta guariba</i>       | 921,200   | 1.1  | 11.4 | 88.3 | <b>VU</b> | <b>DECR</b> |
| <i>Callicebus melanochir</i>  | 84,979    | 0.7  | 9.2  | 90.7 | <b>VU</b> | <b>DECR</b> |
| <i>Callicebus personatus</i>  | 139,312   | 0.1  | 5    | 95.1 | <b>VU</b> | <b>DECR</b> |
| <i>Saguinus leucopus</i>      | 56,862    | 0.1  | 7    | 92.9 | <b>VU</b> | <b>DECR</b> |
| <i>Callithrix flaviceps</i>   | 24,733    | 0.01 | 2.3  | 97.8 | <b>CR</b> | <b>DECR</b> |
| <i>Alouatta ululata</i>       | 97,223    | 0.04 | 28   | 72   | <b>EN</b> | <b>DECR</b> |
| <i>Plecturocebus ornatus</i>  | 23,836    | 0.01 | 27.6 | 72.4 | <b>VU</b> | <b>DECR</b> |

**Table S3. Primate range and Indigenous Peoples' lands in mainland Africa.** Estimated distributional range and percentage of primate species in mainland Africa that overlaps with Indigenous Peoples lands (IPLs), protected areas (PAs) and other lands (OLs). Also shown are the IUCN conservation and population trend status for each species. Distributional range of each species is based on our estimates using the IUCN Red List spatial dataset. Source of conservation and population status is the IUCN Red list (<https://www.iucnredlist.org/>; last consulted 14-April-2021). Source of spatial data of Indigenous Peoples lands: UN Environment Programme World Conservation Monitoring Centre (22, 51). Note that the sum of percent values for a species range in IPLs, PAs, and OLs exceed 100% because IPLs and PAs may coincide partially or entirely with each other in geographical space.

| Species (n = 87)                   | Estimated range (km <sup>2</sup> ) | % of range in IPLs | % of range in PAs | % of range in OLs | IUCN Status | IUCN Population trend |
|------------------------------------|------------------------------------|--------------------|-------------------|-------------------|-------------|-----------------------|
| <i>Erythrocebus baumstarki</i>     | 14,175                             | 32.8               | 100               | 2.5               | <b>CR</b>   | <b>DECR</b>           |
| <i>Gorilla gorilla</i>             | 681,356                            | 28.4               | 39.7              | 40.3              | <b>CR</b>   | <b>DECR</b>           |
| <i>Gorilla beringei</i>            | 48,938                             | 25.4               | 50.8              | 40.8              | <b>CR</b>   | <b>DECR</b>           |
| <i>Colobus vellerosus</i>          | 423,194                            | 19.4               | 25.4              | 67                | <b>CR</b>   | <b>DECR</b>           |
| <i>Sciurocheirus makandensis</i>   | 10,215                             | 51.5               | 1                 | 47.6              | <b>DD</b>   | <b>UNK</b>            |
| <i>Ptilocolobus foai</i>           | 1,939                              | 82.4               | 32.9              | 15.2              | <b>EN</b>   | <b>DECR</b>           |
| <i>Cercocebus chrysogaster</i>     | 78,981                             | 68.9               | 3.9               | 31                | <b>EN</b>   | <b>DECR</b>           |
| <i>Macaca sylvanus</i>             | 20,186                             | 42.5               | 59.1              | 18.3              | <b>EN</b>   | <b>DECR</b>           |
| <i>Allochrocebus preussi</i>       | 33,799                             | 38.8               | 20.8              | 40.6              | <b>EN</b>   | <b>DECR</b>           |
| <i>Pan paniscus</i>                | 415,766                            | 32.9               | 31                | 46.7              | <b>EN</b>   | <b>DECR</b>           |
| <i>Cercopithecus dryas</i>         | 3,513                              | 27.3               | 13.5              | 68.4              | <b>EN</b>   | <b>UNK</b>            |
| <i>Pan troglodytes</i>             | 2,242,092                          | 22.7               | 29.9              | 55.2              | <b>EN</b>   | <b>DECR</b>           |
| <i>Ptilocolobus lulindicus</i>     | 95,387                             | 16.2               | 13.9              | 74.5              | <b>EN</b>   | <b>DECR</b>           |
| <i>Cercocebus torquatus</i>        | 490,665                            | 13                 | 28.8              | 63.8              | <b>EN</b>   | <b>DECR</b>           |
| <i>Ptilocolobus langi</i>          | 50,126                             | 12.4               | 4.4               | 83.2              | <b>EN</b>   | <b>DECR</b>           |
| <i>Ptilocolobus bowieri</i>        | 19,916                             | 9                  | 100               | 0                 | <b>EN</b>   | <b>DECR</b>           |
| <i>Ptilocolobus parmentieri</i>    | 19,100                             | 8                  | 0.2               | 91.8              | <b>EN</b>   | <b>DECR</b>           |
| <i>Ptilocolobus badius</i>         | 256,346                            | 6.1                | 19.5              | 77.8              | <b>EN</b>   | <b>DECR</b>           |
| <i>Cercocebus lunulatus</i>        | 123,222                            | 5.1                | 33.8              | 72.4              | <b>EN</b>   | <b>DECR</b>           |
| <i>Cercopithecus sclateri</i>      | 34,374                             | 1.7                | 4                 | 94.5              | <b>EN</b>   | <b>DECR</b>           |
| <i>Cercopithecus erythrogaster</i> | 71,222                             | 0.3                | 20.2              | 79.7              | <b>EN</b>   | <b>DECR</b>           |
| <i>Papio hamadryas</i>             | 874,455                            | 63.6               | 17.8              | 35                | <b>LC</b>   | <b>INCR</b>           |
| <i>Chlorocebus sabaues</i>         | 1,416,666                          | 62.7               | 20.8              | 30.1              | <b>LC</b>   | <b>DECR</b>           |
| <i>Chlorocebus tantalus</i>        | 3,935,517                          | 54.6               | 17.5              | 38.9              | <b>LC</b>   | <b>STA</b>            |
| <i>Galago senegalensis</i>         | 15,444,930                         | 54.2               | 21.2              | 36.8              | <b>LC</b>   | <b>DECR</b>           |
| <i>Papio anubis</i>                | 7,799,765                          | 53.6               | 18.9              | 38.8              | <b>LC</b>   | <b>STA</b>            |
| <i>Galago gallarum</i>             | 593,131                            | 42.4               | 15.3              | 55.4              | <b>LC</b>   | <b>STA</b>            |
| <i>Colobus guereza</i>             | 5,189,624                          | 36.4               | 25.1              | 47                | <b>LC</b>   | <b>DECR</b>           |

|                                    |           |      |      |      |    |      |
|------------------------------------|-----------|------|------|------|----|------|
| <i>Allenopithecus nigroviridis</i> | 526,623   | 32.4 | 40.7 | 39.8 | LC | DECR |
| <i>Chlorocebus aethiops</i>        | 2,287,892 | 31.7 | 18   | 60.1 | LC | STA  |
| <i>Euoticus elegantulus</i>        | 1,533,666 | 30.9 | 35.9 | 40.6 | LC | UNK  |
| <i>Galago matschiei</i>            | 173,452   | 28.6 | 52.4 | 34.7 | LC | DECR |
| <i>Arctocebus aureus</i>           | 1,304,288 | 28.4 | 40.9 | 39.3 | LC | UNK  |
| <i>Cercopithecus cephus</i>        | 820,363   | 25.9 | 35.5 | 45.7 | LC | UNK  |
| <i>Cercopithecus neglectus</i>     | 4,576,350 | 24.6 | 24.4 | 57.8 | LC | UNK  |
| <i>Cercocebus agilis</i>           | 990,299   | 23.6 | 33.9 | 50.3 | LC | DECR |
| <i>Perodicticus edwardsi</i>       | 4,826,599 | 23.1 | 20.2 | 62.1 | LC | STA  |
| <i>Galagoides thomasi</i>          | 8,525,081 | 22.7 | 20.6 | 62   | LC | STA  |
| <i>Sciurocheirus gabonensis</i>    | 1,052,999 | 22.6 | 42.4 | 43.1 | LC | UNK  |
| <i>Galagoides demidoff</i>         | 8,418,296 | 19.8 | 18.8 | 65.5 | LC | STA  |
| <i>Cercopithecus ascanius</i>      | 5,239,246 | 19.5 | 16.7 | 68.6 | LC | DECR |
| <i>Cercopithecus denti</i>         | 408,498   | 18.6 | 24   | 64   | LC | DECR |
| <i>Chlorocebus pygerythrus</i>     | 9,048,685 | 18.1 | 31.4 | 55.7 | LC | DECR |
| <i>Theropithecus gelada</i>        | 207,704   | 17.3 | 1.2  | 81.9 | LC | DECR |
| <i>Perodicticus ibeanus</i>        | 1,722,392 | 14.5 | 20.2 | 69.8 | LC | DECR |
| <i>Cercopithecus mitis</i>         | 2,278,866 | 14.2 | 29   | 60.1 | LC | DECR |
| <i>Paragalago cocos</i>            | 17,053    | 11.8 | 25.7 | 68.6 | LC | DECR |
| <i>Otolemur garnettii</i>          | 1,109,640 | 11.3 | 49.7 | 46.1 | LC | DECR |
| <i>Chlorocebus cynosuroides</i>    | 6,148,699 | 10.5 | 15.8 | 75.1 | LC | STA  |
| <i>Papio kindae</i>                | 2,210,188 | 9.3  | 15.6 | 75.4 | LC | STA  |
| <i>Papio cynocephalus</i>          | 1,614,601 | 8.3  | 36.9 | 57.1 | LC | STA  |
| <i>Otolemur crassicaudatus</i>     | 9,551,243 | 7.6  | 29.5 | 64.8 | LC | STA  |
| <i>Galago moholi</i>               | 8,239,642 | 6.8  | 30.5 | 65   | LC | STA  |
| <i>Papio ursinus</i>               | 3,207,468 | 6.2  | 26.3 | 71.5 | LC | DECR |
| <i>Erythrocebus patas</i>          | 6,390,906 | 64.8 | 18.7 | 29   | NT | DECR |
| <i>Allochrocebus solatus</i>       | 37,884    | 62.7 | 33.1 | 17.6 | NT | UNK  |
| <i>Papio papio</i>                 | 486,091   | 50.6 | 20.3 | 37.9 | NT | DECR |
| <i>Cercopithecus mona</i>          | 643,022   | 44   | 15.1 | 47.2 | NT | DECR |
| <i>Miopithecus ogouensis</i>       | 942,976   | 31.7 | 26.9 | 48.8 | NT | DECR |
| <i>Cercopithecus wolfi</i>         | 710,552   | 28.4 | 23.1 | 57.9 | NT | DECR |
| <i>Cercopithecus nictitans</i>     | 1,330,848 | 26.1 | 27.9 | 51.7 | NT | DECR |
| <i>Cercopithecus pogonias</i>      | 1,101,655 | 23.6 | 32.8 | 49.4 | NT | DECR |
| <i>Arctocebus calabarensis</i>     | 147,786   | 21.4 | 14.1 | 65.2 | NT | DECR |
| <i>Perodicticus potto</i>          | 560,921   | 6.8  | 24.1 | 77.2 | NT | DECR |
| <i>Sciurocheirus alleni</i>        | 92,357    | 4.3  | 19.1 | 76.8 | NT | DECR |
| <i>Cercopithecus petaurista</i>    | 435,279   | 2.9  | 16.9 | 81.7 | NT | DECR |
| <i>Euoticus pallidus</i>           | 93,273    | 2    | 19.6 | 78.5 | NT | DECR |
| <i>Paragalago zanzibaricus</i>     | 6,382     | 1.1  | 28.5 | 70.4 | NT | DECR |
| <i>Cercopithecus campbelli</i>     | 231,373   | 0.3  | 13.7 | 86.0 | NT | DECR |



|                                  |           |      |      |      |           |             |
|----------------------------------|-----------|------|------|------|-----------|-------------|
| <i>Chlorocebus djandjamensis</i> | 18,165    | 78.5 | 49.2 | 20.9 | <b>VU</b> | <b>DECR</b> |
| <i>Cercopithecus lomamiensis</i> | 19,607    | 38.8 | 48.8 | 27.5 | <b>VU</b> | <b>DECR</b> |
| <i>Ptilocolobus tholloni</i>     | 498,485   | 38.7 | 31.5 | 42.9 | <b>VU</b> | <b>DECR</b> |
| <i>Mandrillus sphinx</i>         | 651,418   | 34.9 | 28.4 | 45.2 | <b>VU</b> | <b>DECR</b> |
| <i>Colobus caudatus</i>          | 4,665     | 33.6 | 64.3 | 10.2 | <b>VU</b> | <b>DECR</b> |
| <i>Colobus satanas</i>           | 315,599   | 31   | 25.7 | 51.2 | <b>VU</b> | <b>DECR</b> |
| <i>Ptilocolobus semlikiensis</i> | 54,082    | 30.9 | 35.5 | 38.5 | <b>VU</b> | <b>DECR</b> |
| <i>Lophocebus aterrimus</i>      | 706,964   | 28.1 | 23.2 | 58.1 | <b>VU</b> | <b>DECR</b> |
| <i>Cercopithecus hamlyni</i>     | 225,790   | 24.8 | 24.9 | 60.2 | <b>VU</b> | <b>DECR</b> |
| <i>Allochrocebus lhoesti</i>     | 432,043   | 23.3 | 28.1 | 59.6 | <b>VU</b> | <b>DECR</b> |
| <i>Lophocebus albigena</i>       | 1,494,662 | 23.1 | 27.3 | 55.9 | <b>VU</b> | <b>DECR</b> |
| <i>Ptilocolobus oustaleti</i>    | 424,140   | 17.2 | 32.6 | 58.9 | <b>VU</b> | <b>DECR</b> |
| <i>Colobus angolensis</i>        | 2,122,381 | 16.9 | 14.4 | 72.9 | <b>VU</b> | <b>DECR</b> |
| <i>Cercopithecus lowei</i>       | 219,668   | 9.6  | 27.5 | 71.7 | <b>VU</b> | <b>DECR</b> |
| <i>Procolobus verus</i>          | 305,042   | 2.4  | 19.3 | 78.9 | <b>VU</b> | <b>DECR</b> |
| <i>Cercopithecus erythrotis</i>  | 53,963    | 1.6  | 31.1 | 67.4 | <b>VU</b> | <b>DECR</b> |
| <i>Miopithecus talapoin</i>      | 394,458   | 0.7  | 2.2  | 97.1 | <b>VU</b> | <b>DECR</b> |
| <i>Paragalago orinus</i>         | 18,913    | 0.02 | 28.7 | 71.3 | <b>VU</b> | <b>DECR</b> |

**Table S4. Primate range and Indigenous Peoples' lands in the Indo-Malayan realm.**

Distributional range and percentage of primate species in the Indo-Malayan region that overlaps with Indigenous Peoples lands (IPLs), protected areas (PAs) and other lands (OLs). Also shown are the IUCN conservation and population trend status for each species. Distributional range of each species is based on our estimates using the IUCN Red List spatial dataset. Source of conservation and population status is the IUCN Red list (<https://www.iucnredlist.org/>; last consulted 14-April-2021). Source of spatial data of Indigenous Peoples lands: UN Environment Programme World Conservation Monitoring Centre (22, 51). Note that the sum of percent values for a species range in IPLs, PAs, and OLs exceed 100% because IPLs and PAs may coincide partially or entirely with each other in geographical space.

| Species (n= 103)                    | Range (km <sup>2</sup> ) | % of range in IPLs | % of range in PAs | % of range in OLs | IUCN Status | IUCN Population trend |
|-------------------------------------|--------------------------|--------------------|-------------------|-------------------|-------------|-----------------------|
| <i>Nomascus nasutus</i>             | 8,312                    | 100                | 0.9               | 0                 | <b>CR</b>   | <b>DECR</b>           |
| <i>Rhinopithecus strykeri</i>       | 203                      | 100                | 81.8              | 0                 | <b>CR</b>   | <b>DECR</b>           |
| <i>Trachypithecus leucocephalus</i> | 835                      | 100                | 0                 | 0                 | <b>CR</b>   | <b>DECR</b>           |
| <i>Nomascus hainanus</i>            | 165                      | 95.2               | 0                 | 4.8               | <b>CR</b>   | <b>STA</b>            |
| <i>Trachypithecus poliocephalus</i> | 945                      | 88.4               | 0                 | 11.6              | <b>CR</b>   | <b>INCR</b>           |
| <i>Nomascus leucogenys</i>          | 51,341                   | 85.2               | 26.1              | 12.7              | <b>CR</b>   | <b>DECR</b>           |
| <i>Nomascus siki</i>                | 26,549                   | 82.7               | 57.6              | 9.8               | <b>CR</b>   | <b>DECR</b>           |
| <i>Pongo abelii</i>                 | 17,731                   | 82.2               | 92.9              | 8.8               | <b>CR</b>   | <b>DECR</b>           |
| <i>Pongo tapanuliensis</i>          | 1,024                    | 81.4               | 10.5              | 9                 | <b>CR</b>   | <b>DECR</b>           |
| <i>Presbytis chrysomelas</i>        | 32,911                   | 79.9               | 24.6              | 16.6              | <b>CR</b>   | <b>DECR</b>           |
| <i>Nomascus concolor</i>            | 26,326                   | 78.8               | 16.2              | 20.9              | <b>CR</b>   | <b>DECR</b>           |
| <i>Rhinopithecus avunculus</i>      | 10,210                   | 78.6               | 10.6              | 20                | <b>CR</b>   | <b>DECR</b>           |
| <i>Pygathrix cinerea</i>            | 24,681                   | 76.3               | 11.7              | 21.7              | <b>CR</b>   | <b>DECR</b>           |
| <i>Pygathrix nemaus</i>             | 91,143                   | 72.5               | 38.8              | 17                | <b>CR</b>   | <b>DECR</b>           |
| <i>Macaca nigra</i>                 | 1,405                    | 66.1               | 1.2               | 33.9              | <b>CR</b>   | <b>DECR</b>           |
| <i>Pongo pygmaeus</i>               | 211,445                  | 59.7               | 17.5              | 35.1              | <b>CR</b>   | <b>DECR</b>           |
| <i>Trachypithecus delacouri</i>     | 6,008                    | 58.8               | 12.8              | 35.7              | <b>CR</b>   | <b>DECR</b>           |
| <i>Pygathrix nigripes</i>           | 93,733                   | 57.8               | 28.9              | 30.8              | <b>CR</b>   | <b>DECR</b>           |
| <i>Tarsius lariang</i>              | 23,697                   | 51.5               | 4.7               | 48.4              | <b>DD</b>   | <b>DECR</b>           |
| <i>Presbytis bicolor</i>            | 25,007                   | 10.6               | 6                 | 85.6              | <b>DD</b>   | <b>UNK</b>            |
| <i>Rhinopithecus bieti</i>          | 29,674                   | 100                | 22                | 0                 | <b>EN</b>   | <b>STA</b>            |
| <i>Trachypithecus shortridgei</i>   | 10,597                   | 100                | 30.8              | 0                 | <b>EN</b>   | <b>DECR</b>           |
| <i>Tarsius pumilus</i>              | 396                      | 99.7               | 2.6               | 0.3               | <b>EN</b>   | <b>DECR</b>           |
| <i>Macaca munzala</i>               | 1,723                    | 98.8               | 4.5               | 0.4               | <b>EN</b>   | <b>DECR</b>           |
| <i>Rhinopithecus brelichi</i>       | 503                      | 93.4               | 69.5              | 1.1               | <b>EN</b>   | <b>DECR</b>           |
| <i>Nomascus annamensis</i>          | 38,530                   | 77.8               | 43.7              | 2.6               | <b>EN</b>   | <b>DECR</b>           |
| <i>Trachypithecus francoisi</i>     | 248,808                  | 73.4               | 0.8               | 26.5              | <b>EN</b>   | <b>DECR</b>           |

|                                   |           |      |      |      |    |      |
|-----------------------------------|-----------|------|------|------|----|------|
| <i>Hylobates funereus</i>         | 252,247   | 71.1 | 13.9 | 25   | EN | DECR |
| <i>Nycticebus pygmaeus</i>        | 472,834   | 70.2 | 18.3 | 24.9 | EN | DECR |
| <i>Trachypithecus hatinhensis</i> | 18,902    | 69.8 | 32.3 | 26.2 | EN | DECR |
| <i>Hylobates abbotti</i>          | 128,164   | 69.3 | 10.2 | 29.6 | EN | DECR |
| <i>Presbytis canicrus</i>         | 58,718    | 66.3 | 3.5  | 32.1 | EN | DECR |
| <i>Trachypithecus laotum</i>      | 2,850     | 62.3 | 70.2 | 19.6 | EN | DECR |
| <i>Trachypithecus phayrei</i>     | 1,137,203 | 60.8 | 11.1 | 36.5 | EN | DECR |
| <i>Hylobates lar</i>              | 604,936   | 60.4 | 23.7 | 33.6 | EN | DECR |
| <i>Nycticebus bengalensis</i>     | 2,030,986 | 60.3 | 14.9 | 34.7 | EN | DECR |
| <i>Hoolock hoolock</i>            | 628,495   | 60.3 | 6.4  | 37.8 | EN | DECR |
| <i>Nycticebus hilleri</i>         | 56,537    | 55.2 | 49.5 | 40.8 | EN | DECR |
| <i>Nomascus gabriellae</i>        | 39,497    | 55.2 | 39.6 | 30.5 | EN | DECR |
| <i>Trachypithecus margarita</i>   | 91,410    | 54.4 | 18.6 | 37.2 | EN | DECR |
| <i>Hylobates albibarbis</i>       | 191,356   | 54.1 | 10   | 43.8 | EN | DECR |
| <i>Nasalis larvatus</i>           | 502,492   | 51.9 | 9.8  | 44.9 | EN | DECR |
| <i>Hoolock tianxing</i>           | 266,542   | 51.2 | 2.4  | 48.1 | EN | DECR |
| <i>Presbytis melalophos</i>       | 86,874    | 49.3 | 36.5 | 45.8 | EN | DECR |
| <i>Trachypithecus germaini</i>    | 339,396   | 48.7 | 33.3 | 37   | EN | DECR |
| <i>Hylobates muelleri</i>         | 94,496    | 48   | 4.3  | 49.7 | EN | DECR |
| <i>Symphalangus syndactylus</i>   | 309,259   | 45.4 | 25.6 | 51.3 | EN | DECR |
| <i>Trachypithecus obscurus</i>    | 231,416   | 44.8 | 17.7 | 48.2 | EN | DECR |
| <i>Hylobates pileatus</i>         | 121,029   | 43.2 | 48.4 | 31   | EN | DECR |
| <i>Presbytis sabana</i>           | 47,382    | 43.2 | 23   | 43   | EN | DECR |
| <i>Presbytis comata</i>           | 21,948    | 38.6 | 6.1  | 56.6 | EN | DECR |
| <i>Hylobates moloch</i>           | 30,998    | 38   | 4.7  | 58.5 | EN | DECR |
| <i>Nycticebus coucang</i>         | 379,311   | 35.7 | 16.2 | 60.7 | EN | DECR |
| <i>Presbytis sumatranus</i>       | 52,946    | 32.6 | 4.8  | 65.4 | EN | DECR |
| <i>Hylobates agilis</i>           | 335,812   | 29.4 | 14.6 | 67   | EN | DECR |
| <i>Macaca maura</i>               | 4,786     | 20.8 | 0.4  | 79.1 | EN | DECR |
| <i>Rhinopithecus roxellana</i>    | 306,615   | 19.8 | 6.7  | 76.3 | EN | DECR |
| <i>Semnopithecus ajax</i>         | 8,509     | 7.9  | 4.1  | 89.6 | EN | DECR |
| <i>Macaca sinica</i>              | 34,566    | 1.7  | 35   | 64.5 | EN | DECR |
| <i>Semnopithecus vetulus</i>      | 29,213    | 0.3  | 30   | 69.8 | EN | DECR |
| <i>Semnopithecus schistaceus</i>  | 311,697   | 55.6 | 18.1 | 37.5 | LC | DECR |
| <i>Macaca mulatta</i>             | 7,346,696 | 39.2 | 6.2  | 58.1 | LC | UNK  |
| <i>Semnopithecus entellus</i>     | 531,191   | 37.1 | 3.8  | 61.3 | LC | DECR |
| <i>Semnopithecus hypoleucos</i>   | 407,285   | 5.6  | 4    | 90.5 | LC | DECR |
| <i>Macaca cyclopis</i>            | 19,880    | 8.5  | 27.9 | 65.7 | LC | STA  |
| <i>Macaca assamensis</i>          | 1,807,463 | 77.2 | 11.7 | 20.4 | NT | DECR |
| <i>Semnopithecus hector</i>       | 101,205   | 53.2 | 9.9  | 40.5 | NT | DECR |
| <i>Presbytis siamensis</i>        | 132,072   | 52   | 16.5 | 45.4 | NT | DECR |

|                                 |           |      |      |      |    |      |
|---------------------------------|-----------|------|------|------|----|------|
| <i>Macaca thibetana</i>         | 1,324,553 | 37.5 | 2.4  | 61.2 | NT | DECR |
| <i>Loris lydekkerianus</i>      | 442,994   | 20.6 | 8.2  | 72.6 | NT | DECR |
| <i>Carlito syrichta</i>         | 83,041    | 17.8 | 14.4 | 69.9 | NT | DECR |
| <i>Semnopithecus priam</i>      | 172,050   | 0.6  | 11.1 | 88.5 | NT | DECR |
| <i>Presbytis hosei</i>          | 116,496   | 89.2 | 18   | 9.3  | VU | DECR |
| <i>Tarsius wallacei</i>         | 557       | 80.6 | 37.1 | 18.5 | VU | DECR |
| <i>Presbytis frontata</i>       | 308,049   | 77   | 8.7  | 21.9 | VU | DECR |
| <i>Tarsius dentatus</i>         | 27,693    | 73   | 17.6 | 24.3 | VU | DECR |
| <i>Trachypithecus barbei</i>    | 21,124    | 71.4 | 72.1 | 25.1 | VU | DECR |
| <i>Nycticebus kayan</i>         | 232,483   | 68.6 | 14.3 | 27.4 | VU | DECR |
| <i>Presbytis rubicunda</i>      | 477,690   | 66.7 | 11   | 30.7 | VU | DECR |
| <i>Hoolock leuconedys</i>       | 112,318   | 66.5 | 19   | 33   | VU | DECR |
| <i>Macaca ochreata</i>          | 23,356    | 66.1 | 13.2 | 28.3 | VU | DECR |
| <i>Tarsius tarsier</i>          | 16,345    | 65.8 | 3.1  | 31.3 | VU | DECR |
| <i>Macaca tonkeana</i>          | 58,550    | 64.4 | 14.6 | 32.8 | VU | DECR |
| <i>Nycticebus menagensis</i>    | 667,762   | 62.6 | 10.5 | 35.1 | VU | DECR |
| <i>Macaca leonina</i>           | 1,490,558 | 61.5 | 18.9 | 32.1 | VU | DECR |
| <i>Presbytis thomasi</i>        | 49,533    | 60.8 | 53.9 | 35.8 | VU | DECR |
| <i>Tarsius spectrumgurskyae</i> | 2,884     | 59.3 | 11.3 | 37.8 | VU | DECR |
| <i>Cephalopachus bancanus</i>   | 752,853   | 57.2 | 10   | 40.2 | VU | DECR |
| <i>Macaca arctoides</i>         | 1,692,673 | 55.8 | 12.9 | 41.3 | VU | DECR |
| <i>Nycticebus borneanus</i>     | 212,713   | 55.5 | 11.4 | 42.7 | VU | DECR |
| <i>Trachypithecus pileatus</i>  | 303,751   | 54.9 | 8.2  | 41.7 | VU | DECR |
| <i>Macaca nemestrina</i>        | 1,209,198 | 51.1 | 14.5 | 45.4 | VU | DECR |
| <i>Trachypithecus cristatus</i> | 1,068,981 | 51   | 13.6 | 46.1 | VU | DECR |
| <i>Macaca nigrescens</i>        | 1,556     | 50.2 | 19.8 | 44.3 | VU | DECR |
| <i>Macaca fascicularis</i>      | 2,320,474 | 43.7 | 16.6 | 49.9 | VU | DECR |
| <i>Macaca hecki</i>             | 16,758    | 41.5 | 15.6 | 53.4 | VU | DECR |
| <i>Tarsius supriatnai</i>       | 15,756    | 38.2 | 15.1 | 56.4 | VU | DECR |
| <i>Trachypithecus mauritius</i> | 6,499     | 33.6 | 10.7 | 58.7 | VU | DECR |
| <i>Presbytis femoralis</i>      | 122,321   | 26.7 | 14   | 62.6 | VU | DECR |
| <i>Tarsius fuscus</i>           | 4,796     | 20.8 | 0.4  | 79.1 | VU | DECR |
| <i>Trachypithecus auratus</i>   | 127,237   | 13.7 | 1.9  | 85.1 | VU | DECR |
| <i>Presbytis mitrata</i>        | 99,170    | 11.6 | 7.2  | 83.5 | VU | DECR |
| <i>Macaca radiata</i>           | 585,401   | 0.9  | 5    | 94.1 | VU | DECR |

**Table S5. Primate species whose range do not overlap Indigenous Peoples' lands.** Estimated distributional range and percentage of primate species that **do not overlap** with Indigenous Peoples lands (IPLs) in mainland Africa ( $n = 20$ ), Indo-Malayan region ( $n = 19$ ) and Neotropics ( $n = 5$ ). Also shown are the IUCN conservation and population trend status for each species. Distributional range of each species is based on our estimates using the IUCN Red List spatial dataset. Source of conservation and population status is the IUCN Red list (<https://www.iucnredlist.org/>; last consulted 14-April-2021). Source of spatial data of Indigenous Peoples lands: UN Environment Programme World Conservation Monitoring Centre (22, 51). Note that the sum of percent values for a species range in IPLs, PAs, and OLs exceed 100% because IPLs and PAs may coincide partially or entirely with each other in geographical space.

|    | Region          | Total species (n= 44)            | Range (km <sup>2</sup> ) | % of range in IPLs | % of range in PAs | % of range in OLs | IUCN Status | IUCN Population trend |
|----|-----------------|----------------------------------|--------------------------|--------------------|-------------------|-------------------|-------------|-----------------------|
| 1  | Mainland Africa | <i>Cercocebus galeritus</i>      | 215                      | 0                  | 73.8              | 26.2              | <b>CR</b>   | <b>DECR</b>           |
| 2  | Mainland Africa | <i>Cercopithecus roloway</i>     | 95,025                   | 0                  | 25.3              | 74.7              | <b>CR</b>   | <b>DECR</b>           |
| 3  | Mainland Africa | <i>Ptilocolobus preussi</i>      | 8,527                    | 0                  | 58.6              | 41.4              | <b>CR</b>   | <b>DECR</b>           |
| 4  | Mainland Africa | <i>Ptilocolobus epieni</i>       | 6,521                    | 0                  | 8.3               | 91.7              | <b>CR</b>   | <b>DECR</b>           |
| 5  | Mainland Africa | <i>Ptilocolobus rufomitratu</i>  | 201                      | 0                  | 53.3              | 46.7              | <b>CR</b>   | <b>DECR</b>           |
| 6  | Mainland Africa | <i>Ptilocolobus waldroni</i>     | 59,035                   | 0                  | 28.5              | 71.5              | <b>CR</b>   | <b>DECR</b>           |
| 7  | Mainland Africa | <i>Ptilocolobus pennantii</i>    | 323                      | 0                  | 0                 | 100               | <b>CR</b>   | <b>DECR</b>           |
| 8  | Mainland Africa | <i>Erythrocebus poliophaeus</i>  | 100                      | 0                  | 0                 | 100               | <b>DD</b>   | <b>DECR</b>           |
| 9  | Mainland Africa | <i>Colobus polykomos</i>         | 260,643                  | 0                  | 13.1              | 86.9              | <b>EN</b>   | <b>DECR</b>           |
| 10 | Mainland Africa | <i>Mandrillus leucophaeus</i>    | 17,117                   | 0                  | 57.4              | 42.6              | <b>EN</b>   | <b>DECR</b>           |
| 11 | Mainland Africa | <i>Cercocebus sanjei</i>         | 376                      | 0                  | 92.2              | 7.8               | <b>EN</b>   | <b>DECR</b>           |
| 12 | Mainland Africa | <i>Rungwecebus kipunji</i>       | 142                      | 0                  | 100               | 0                 | <b>EN</b>   | <b>DECR</b>           |
| 13 | Mainland Africa | <i>Paragalago rondoensis</i>     | 121                      | 0                  | 27                | 73                | <b>EN</b>   | <b>DECR</b>           |
| 14 | Mainland Africa | <i>Cercopithecus diana</i>       | 300,204                  | 0                  | 14                | 86                | <b>EN</b>   | <b>DECR</b>           |
| 15 | Mainland Africa | <i>Ptilocolobus tephrosceles</i> | 3,893                    | 0                  | 85.3              | 14.7              | <b>EN</b>   | <b>DECR</b>           |
| 16 | Mainland Africa | <i>Ptilocolobus kirkii</i>       | 1,582                    | 0                  | 0                 | 100               | <b>EN</b>   | <b>DECR</b>           |
| 17 | Mainland Africa | <i>Paragalago granti</i>         | 694,639                  | 0                  | 43.2              | 56.8              | <b>LC</b>   | <b>DECR</b>           |
| 18 | Mainland Africa | <i>Galagoides kumbirensis</i>    | 18,835                   | 0                  | 6.6               | 93.4              | <b>NT</b>   | <b>UNK</b>            |
| 19 | Mainland Africa | <i>Cercocebus atys</i>           | 237,847                  | 0                  | 13.1              | 86.9              | <b>VU</b>   | <b>DECR</b>           |
| 20 | Mainland Africa | <i>Ptilocolobus gordonorum</i>   | 3,420                    | 0                  | 100               | 0                 | <b>VU</b>   | <b>DECR</b>           |
|    |                 |                                  |                          |                    |                   |                   |             |                       |
| 1  | Indo-Malay      | <i>Macaca pagensis</i>           | 6,004                    | 0                  | 0                 | 100               | <b>CR</b>   | <b>DECR</b>           |
| 2  | Indo-Malay      | <i>Nycticebus bancanus</i>       | 11,526                   | 0                  | 0                 | 100               | <b>CR</b>   | <b>DECR</b>           |
| 3  | Indo-Malay      | <i>Nycticebus javanicus</i>      | 4                        | 0                  | 0                 | 100               | <b>CR</b>   | <b>DECR</b>           |
| 4  | Indo-Malay      | <i>Presbytis potenziani</i>      | 6,004                    | 0                  | 0                 | 100               | <b>CR</b>   | <b>DECR</b>           |
| 5  | Indo-Malay      | <i>Simias concolor</i>           | 6,004                    | 0                  | 0                 | 100               | <b>CR</b>   | <b>DECR</b>           |
| 6  | Indo-Malay      | <i>Tarsius tumpara</i>           | 115                      | 0                  | 0                 | 100               | <b>CR</b>   | <b>DECR</b>           |

|    |            |                                |         |   |      |      |           |             |
|----|------------|--------------------------------|---------|---|------|------|-----------|-------------|
| 7  | Indo-Malay | <i>Macaca silenus</i>          | 25,575  | 0 | 35.7 | 64.3 | <b>EN</b> | <b>DECR</b> |
| 8  | Indo-Malay | <i>Trachypithecus geei</i>     | 7,414   | 0 | 34   | 66   | <b>EN</b> | <b>DECR</b> |
| 9  | Indo-Malay | <i>Loris tardigradus</i>       | 4,061   | 0 | 33.5 | 66.5 | <b>EN</b> | <b>DECR</b> |
| 10 | Indo-Malay | <i>Hylobates klossii</i>       | 6,004   | 0 | 0    | 100  | <b>EN</b> | <b>DECR</b> |
| 11 | Indo-Malay | <i>Macaca siberu</i>           | 3,864   | 0 | 0    | 100  | <b>EN</b> | <b>DECR</b> |
| 12 | Indo-Malay | <i>Presbytis siberu</i>        | 3,864   | 0 | 0    | 100  | <b>EN</b> | <b>DECR</b> |
| 13 | Indo-Malay | <i>Tarsius niemitzi</i>        | 663     | 0 | 0    | 100  | <b>EN</b> | <b>DECR</b> |
| 14 | Indo-Malay | <i>Tarsius pelengensis</i>     | 2,615   | 0 | 0    | 100  | <b>EN</b> | <b>DECR</b> |
| 15 | Indo-Malay | <i>Tarsius sangirensis</i>     | 556     | 0 | 0    | 100  | <b>EN</b> | <b>DECR</b> |
| 16 | Indo-Malay | <i>Macaca fuscata</i>          | 112,096 | 0 | 37   | 63   | <b>LC</b> | <b>STA</b>  |
| 17 | Indo-Malay | <i>Semnopithecus johnii</i>    | 21,936  | 0 | 27.9 | 72.1 | <b>VU</b> | <b>STA</b>  |
| 18 | Indo-Malay | <i>Macaca brunnescens</i>      | 7,445   | 0 | 0    | 100  | <b>VU</b> | <b>DECR</b> |
| 19 | Indo-Malay | <i>Presbytis natunae</i>       | 1,644   | 0 | 0    | 100  | <b>VU</b> | <b>DECR</b> |
|    |            |                                |         |   |      |      |           |             |
| 1  | Neotropics | <i>Leontopithecus caissara</i> | 206     | 0 | 100  | 0    | <b>CR</b> | <b>DECR</b> |
| 2  | Neotropics | <i>Plecturocebus olallae</i>   | 677     | 0 | 15.3 | 84.7 | <b>CR</b> | <b>DECR</b> |
| 3  | Neotropics | <i>Leontopithecus rosalia</i>  | 3,991   | 0 | 28.6 | 71.4 | <b>EN</b> | <b>DECR</b> |
| 4  | Neotropics | <i>Cacajao ayresi</i>          | 6,367   | 0 | 7.2  | 92.8 | <b>LC</b> | <b>STA</b>  |
| 5  | Neotropics | <i>Mico acariensis</i>         | 22,442  | 0 | 56.8 | 43.2 | <b>LC</b> | <b>UNK</b>  |

**Table S6. Primate species of Madagascar whose range overlaps protected areas.**

Estimated distributional range and percentage of primate species in Madagascar that overlaps with Indigenous Peoples lands (IPLs), protected areas (PAs) and other lands (OLs). Also shown are the IUCN conservation and population trend status for each species. Distributional range of each species is based on our estimates using the IUCN Red List spatial dataset. Source of conservation and population status is the IUCN Red list (<https://www.iucnredlist.org/>; last consulted 14-July-2021). Source of spatial data of Indigenous Peoples lands: UN Environment Programme World Conservation Monitoring Centre (51).

| Species (n = 107)                   | Range (km <sup>2</sup> ) | % of range in IPLs | % of range in PAs | % of range in OLs | IUCN Status | IUCN Population trend |
|-------------------------------------|--------------------------|--------------------|-------------------|-------------------|-------------|-----------------------|
| <i>Allocebus trichotis</i>          | 5,424                    | 0                  | 100               | 0                 | <b>EN</b>   | <b>DECR</b>           |
| <i>Avahi betsileo</i>               | 971                      | 0                  | 57.5              | 42.5              | <b>EN</b>   | <b>DECR</b>           |
| <i>Avahi cleesei</i>                | 460                      | 0                  | 100               | 0                 | <b>CR</b>   | <b>DECR</b>           |
| <i>Avahi laniger</i>                | 51,656                   | 0                  | 36.6              | 63.4              | <b>VU</b>   | <b>DECR</b>           |
| <i>Avahi meridionalis</i>           | 1,560                    | 0                  | 0                 | 100               | <b>EN</b>   | <b>DECR</b>           |
| <i>Avahi mooreorum</i>              | 482                      | 0                  | 100               | 0                 | <b>EN</b>   | <b>DECR</b>           |
| <i>Avahi occidentalis</i>           | 3,050                    | 0                  | 73.9              | 26.1              | <b>VU</b>   | <b>DECR</b>           |
| <i>Avahi peyrierasi</i>             | 4,374                    | 0                  | 82.1              | 17.9              | <b>VU</b>   | <b>DECR</b>           |
| <i>Avahi ramanantsoavanai</i>       | 2,278                    | 0                  | 57.1              | 42.9              | <b>VU</b>   | <b>DECR</b>           |
| <i>Avahi unicolor</i>               | 498                      | 0                  | 100               | 0                 | <b>CR</b>   | <b>DECR</b>           |
| <i>Cheirogaleus andysabini</i>      | 616                      | 0                  | 0                 | 100               | <b>EN</b>   | <b>DECR</b>           |
| <i>Cheirogaleus crossleyi</i>       | 20,512                   | 0                  | 67.2              | 32.8              | <b>VU</b>   | <b>DECR</b>           |
| <i>Cheirogaleus grovesi</i>         | 924                      | 0                  | 100               | 0                 | <b>DD</b>   | <b>DECR</b>           |
| <i>Cheirogaleus lavasoensis</i>     | 52                       | 0                  | 18.2              | 81.8              | <b>EN</b>   | <b>DECR</b>           |
| <i>Cheirogaleus major</i>           | 5,297                    | 0                  | 54.4              | 45.6              | <b>VU</b>   | <b>DECR</b>           |
| <i>Cheirogaleus medius</i>          | 8,983                    | 0                  | 62.9              | 37.1              | <b>VU</b>   | <b>DECR</b>           |
| <i>Cheirogaleus shethi</i>          | 135                      | 0                  | 100               | 0                 | <b>EN</b>   | <b>DECR</b>           |
| <i>Cheirogaleus sibreei</i>         | 502                      | 0                  | 58.2              | 41.8              | <b>CR</b>   | <b>DECR</b>           |
| <i>Cheirogaleus thomasi</i>         | 134                      | 0                  | 0                 | 100               | <b>EN</b>   | <b>DECR</b>           |
| <i>Daubentonia madagascariensis</i> | 96,882                   | 0                  | 46.2              | 53.8              | <b>EN</b>   | <b>DECR</b>           |
| <i>Eulemur albifrons</i>            | 16,307                   | 0                  | 72.3              | 27.7              | <b>VU</b>   | <b>DECR</b>           |
| <i>Eulemur cinereiceps</i>          | 1,656                    | 0                  | 100               | 0                 | <b>CR</b>   | <b>DECR</b>           |
| <i>Eulemur collaris</i>             | 1,879                    | 0                  | 55.5              | 44.5              | <b>EN</b>   | <b>DECR</b>           |
| <i>Eulemur coronatus</i>            | 1,357                    | 0                  | 85.5              | 14.5              | <b>EN</b>   | <b>DECR</b>           |
| <i>Eulemur flavifrons</i>           | 2,071                    | 0                  | 17.3              | 82.7              | <b>CR</b>   | <b>DECR</b>           |
| <i>Eulemur fulvus</i>               | 48,170                   | 0                  | 34.2              | 65.8              | <b>VU</b>   | <b>DECR</b>           |
| <i>Eulemur macaco</i>               | 7,232                    | 0                  | 55.8              | 44.2              | <b>EN</b>   | <b>DECR</b>           |
| <i>Eulemur mongoz</i>               | 6,113                    | 0                  | 70.4              | 29.6              | <b>CR</b>   | <b>DECR</b>           |
| <i>Eulemur rubriventer</i>          | 51,229                   | 0                  | 66.9              | 33.1              | <b>VU</b>   | <b>DECR</b>           |

|                                  |        |   |      |      |           |             |
|----------------------------------|--------|---|------|------|-----------|-------------|
| <i>Eulemur rufifrons</i>         | 27,835 | 0 | 47.4 | 52.6 | <b>VU</b> | <b>DECR</b> |
| <i>Eulemur rufus</i>             | 27,769 | 0 | 31.5 | 68.5 | <b>VU</b> | <b>DECR</b> |
| <i>Eulemur sanfordi</i>          | 389    | 0 | 91.7 | 8.3  | <b>EN</b> | <b>DECR</b> |
| <i>Hapalemur alaotrensis</i>     | 216    | 0 | 100  | 0    | <b>CR</b> | <b>DECR</b> |
| <i>Hapalemur aureus</i>          | 2,393  | 0 | 100  | 0    | <b>CR</b> | <b>DECR</b> |
| <i>Hapalemur griseus</i>         | 77,150 | 0 | 32.1 | 67.9 | <b>VU</b> | <b>DECR</b> |
| <i>Hapalemur meridionalis</i>    | 4,880  | 0 | 78.4 | 21.6 | <b>VU</b> | <b>DECR</b> |
| <i>Hapalemur occidentalis</i>    | 22,469 | 0 | 70.6 | 29.4 | <b>VU</b> | <b>DECR</b> |
| <i>Indri indri</i>               | 30,055 | 0 | 43.6 | 56.4 | <b>CR</b> | <b>DECR</b> |
| <i>Lemur catta</i>               | 72,114 | 0 | 13.8 | 86.2 | <b>EN</b> | <b>DECR</b> |
| <i>Lepilemur aeeclis</i>         | 358    | 0 | 38.6 | 61.4 | <b>EN</b> | <b>DECR</b> |
| <i>Lepilemur ahmansonori</i>     | 281    | 0 | 100  | 0    | <b>CR</b> | <b>DECR</b> |
| <i>Lepilemur ankaranensis</i>    | 121    | 0 | 99.9 | 0.1  | <b>EN</b> | <b>DECR</b> |
| <i>Lepilemur betsileo</i>        | 2,186  | 0 | 100  | 0    | <b>EN</b> | <b>DECR</b> |
| <i>Lepilemur dorsalis</i>        | 3,810  | 0 | 75.9 | 24.1 | <b>EN</b> | <b>DECR</b> |
| <i>Lepilemur edwardsi</i>        | 8,721  | 0 | 23.6 | 76.4 | <b>EN</b> | <b>DECR</b> |
| <i>Lepilemur fleuretae</i>       | 1,496  | 0 | 0    | 100  | <b>EN</b> | <b>DECR</b> |
| <i>Lepilemur grewcockorum</i>    | 139    | 0 | 0    | 100  | <b>CR</b> | <b>DECR</b> |
| <i>Lepilemur hollandorum</i>     | 282    | 0 | 86.7 | 13.3 | <b>CR</b> | <b>DECR</b> |
| <i>Lepilemur hubbardorum</i>     | 213    | 0 | 98.9 | 1.1  | <b>EN</b> | <b>DECR</b> |
| <i>Lepilemur jamesorum</i>       | 64     | 0 | 0    | 100  | <b>CR</b> | <b>DECR</b> |
| <i>Lepilemur leucopus</i>        | 1,954  | 0 | 0    | 100  | <b>EN</b> | <b>DECR</b> |
| <i>Lepilemur microdon</i>        | 2,506  | 0 | 100  | 0    | <b>EN</b> | <b>DECR</b> |
| <i>Lepilemur milanoii</i>        | 1,569  | 0 | 71.6 | 28.4 | <b>EN</b> | <b>DECR</b> |
| <i>Lepilemur mittermeieri</i>    | 530    | 0 | 67.8 | 32.2 | <b>CR</b> | <b>DECR</b> |
| <i>Lepilemur mustelinus</i>      | 9,892  | 0 | 63.5 | 36.5 | <b>VU</b> | <b>DECR</b> |
| <i>Lepilemur otto</i>            | 3,486  | 0 | 16.9 | 83.1 | <b>EN</b> | <b>DECR</b> |
| <i>Lepilemur petteri</i>         | 7,106  | 0 | 10.9 | 89.1 | <b>EN</b> | <b>DECR</b> |
| <i>Lepilemur randrianasoloi</i>  | 1,885  | 0 | 100  | 0    | <b>EN</b> | <b>DECR</b> |
| <i>Lepilemur ruficaudatus</i>    | 15,568 | 0 | 34.3 | 65.7 | <b>CR</b> | <b>DECR</b> |
| <i>Lepilemur sahamalaza</i>      | 107    | 0 | 32.9 | 67.1 | <b>CR</b> | <b>DECR</b> |
| <i>Lepilemur scottorum</i>       | 482    | 0 | 100  | 0    | <b>EN</b> | <b>DECR</b> |
| <i>Lepilemur seali</i>           | 7,397  | 0 | 93.7 | 6.3  | <b>VU</b> | <b>DECR</b> |
| <i>Lepilemur septentrionalis</i> | 139    | 0 | 0    | 100  | <b>CR</b> | <b>DECR</b> |
| <i>Lepilemur tymerlachsoni</i>   | 53     | 0 | 0    | 100  | <b>CR</b> | <b>DECR</b> |
| <i>Lepilemur wrightae</i>        | 585    | 0 | 48.7 | 51.3 | <b>EN</b> | <b>DECR</b> |
| <i>Microcebus arnholdi</i>       | 393    | 0 | 77.7 | 22.3 | <b>VU</b> | <b>DECR</b> |
| <i>Microcebus berthae</i>        | 546    | 0 | 98.3 | 1.7  | <b>CR</b> | <b>DECR</b> |
| <i>Microcebus bongolavensis</i>  | 789    | 0 | 74.5 | 25.5 | <b>EN</b> | <b>DECR</b> |
| <i>Microcebus boraha</i>         | 170    | 0 | 0    | 100  | <b>DD</b> | <b>DECR</b> |
| <i>Microcebus danfossi</i>       | 938    | 0 | 4.2  | 95.8 | <b>VU</b> | <b>DECR</b> |



|                                 |        |   |      |      |           |             |
|---------------------------------|--------|---|------|------|-----------|-------------|
| <i>Microcebus ganzhorni</i>     | 154    | 0 | 0    | 100  | <b>EN</b> | <b>DECR</b> |
| <i>Microcebus gerpi</i>         | 21     | 0 | 89.8 | 10.2 | <b>CR</b> | <b>DECR</b> |
| <i>Microcebus griseorufus</i>   | 12,816 | 0 | 18.3 | 81.7 | <b>LC</b> | <b>DECR</b> |
| <i>Microcebus jollyae</i>       | 157    | 0 | 1.4  | 98.6 | <b>EN</b> | <b>DECR</b> |
| <i>Microcebus lehilahytsara</i> | 2,972  | 0 | 34.9 | 65.1 | <b>VU</b> | <b>DECR</b> |
| <i>Microcebus macarthurii</i>   | 677    | 0 | 100  | 0    | <b>EN</b> | <b>DECR</b> |
| <i>Microcebus mampiratra</i>    | 77     | 0 | 0    | 100  | <b>EN</b> | <b>DECR</b> |
| <i>Microcebus manitatra</i>     | 25     | 0 | 0    | 100  | <b>CR</b> | <b>DECR</b> |
| <i>Microcebus margotmarshae</i> | 903    | 0 | 100  | 0    | <b>EN</b> | <b>DECR</b> |
| <i>Microcebus marohita</i>      | 28     | 0 | 100  | 0    | <b>CR</b> | <b>DECR</b> |
| <i>Microcebus mittermeieri</i>  | 347    | 0 | 95.5 | 4.5  | <b>EN</b> | <b>DECR</b> |
| <i>Microcebus murinus</i>       | 66,206 | 0 | 32.4 | 67.6 | <b>LC</b> | <b>DECR</b> |
| <i>Microcebus myoxinus</i>      | 17,844 | 0 | 29   | 71   | <b>VU</b> | <b>DECR</b> |
| <i>Microcebus ravelobensis</i>  | 3,337  | 0 | 74.7 | 25.3 | <b>VU</b> | <b>DECR</b> |
| <i>Microcebus rufus</i>         | 2,607  | 0 | 100  | 0    | <b>VU</b> | <b>DECR</b> |
| <i>Microcebus sambiranensis</i> | 705    | 0 | 84.9 | 15.1 | <b>EN</b> | <b>DECR</b> |
| <i>Microcebus simmonsi</i>      | 737    | 0 | 100  | 0    | <b>EN</b> | <b>DECR</b> |
| <i>Microcebus tanosi</i>        | 760    | 0 | 0    | 100  | <b>EN</b> | <b>DECR</b> |
| <i>Microcebus tavaratra</i>     | 1,634  | 0 | 71.4 | 28.6 | <b>VU</b> | <b>DECR</b> |
| <i>Mirza coquereli</i>          | 16,733 | 0 | 37.2 | 62.8 | <b>EN</b> | <b>DECR</b> |
| <i>Mirza zaza</i>               | 8,556  | 0 | 36.1 | 63.9 | <b>VU</b> | <b>DECR</b> |
| <i>Phaner electromontis</i>     | 435    | 0 | 83.4 | 16.6 | <b>EN</b> | <b>DECR</b> |
| <i>Phaner furcifer</i>          | 17,255 | 0 | 60.1 | 39.9 | <b>EN</b> | <b>DECR</b> |
| <i>Phaner pallescens</i>        | 41,567 | 0 | 32.3 | 67.7 | <b>EN</b> | <b>DECR</b> |
| <i>Phaner parienti</i>          | 1,413  | 0 | 38.2 | 61.8 | <b>EN</b> | <b>DECR</b> |
| <i>Prolemur simus</i>           | 1,709  | 0 | 100  | 0    | <b>CR</b> | <b>DECR</b> |
| <i>Propithecus candidus</i>     | 1,361  | 0 | 100  | 0    | <b>CR</b> | <b>DECR</b> |
| <i>Propithecus coquereli</i>    | 7,101  | 0 | 22.5 | 77.5 | <b>CR</b> | <b>DECR</b> |
| <i>Propithecus coronatus</i>    | 45,076 | 0 | 2.7  | 97.3 | <b>CR</b> | <b>DECR</b> |
| <i>Propithecus deckenii</i>     | 16,874 | 0 | 48.4 | 51.6 | <b>CR</b> | <b>DECR</b> |
| <i>Propithecus diadema</i>      | 16,421 | 0 | 48.1 | 51.9 | <b>CR</b> | <b>DECR</b> |
| <i>Propithecus edwardsi</i>     | 909    | 0 | 100  | 0    | <b>EN</b> | <b>DECR</b> |
| <i>Propithecus perrieri</i>     | 62     | 0 | 0    | 100  | <b>CR</b> | <b>DECR</b> |
| <i>Propithecus tattersalli</i>  | 868    | 0 | 98.9 | 1.1  | <b>CR</b> | <b>DECR</b> |
| <i>Propithecus verreauxi</i>    | 18,448 | 0 | 37.2 | 62.8 | <b>CR</b> | <b>DECR</b> |
| <i>Varecia rubra</i>            | 2,760  | 0 | 100  | 0    | <b>CR</b> | <b>DECR</b> |
| <i>Varecia variegata</i>        | 20,361 | 0 | 66.4 | 33.6 | <b>CR</b> | <b>DECR</b> |

**Table. S7. A comparison of the Human Footprint on Indigenous Peoples' lands and at different distances from the border of those lands across the global primate range.**

Summary results of GLMs relating the occurrence of intact areas at different distances from IPL borders (reference level). Zones examined are (1) up to 10 km from IPL borders (10 km), (2) at 10-25 km from IPL borders (25 km) and (3) between 25 to 50 km (50 km) from IPL borders. Results are presented for each region (Neotropics, Africa and Indo-Malayan realm). Est. = Estimate, CI = Confidence Interval, p = *p-value*.

| Predictors | Neotropics |               |        | Africa |              |        | Indo-Malayan Realm |               |        |
|------------|------------|---------------|--------|--------|--------------|--------|--------------------|---------------|--------|
|            | Est.       | CI            | p      | Est.   | CI           | p      | Est.               | CI            | p      |
| Intercept  | 0.83       | 0.82 – 0.83   | <0.001 | 0.56   | 0.55 – 0.56  | <0.001 | 0.47               | 0.46 – 0.47   | <0.001 |
| 10 km      | -0.11      | -0.12 – -0.10 | <0.001 | 0.00   | -0.01 – 0.02 | 0.512  | -0.28              | -0.28 – -0.27 | <0.001 |
| 25 km      | -0.14      | -0.15 – -0.14 | <0.001 | 0.02   | 0.01 – 0.03  | <0.001 | -0.29              | -0.30 – -0.29 | <0.001 |
| 50 km      | -0.19      | -0.20 – -0.19 | <0.001 | 0.02   | 0.01 – 0.03  | <0.001 | -0.3               | -0.30 – -0.29 | <0.001 |

## REFERENCES AND NOTES

1. S. Díaz, J. Settele, E. S. Brondízio, H. T. Ngo, J. Agard, A. Arneth, P. Balvanera, K. A. Brauman, S. H. M. Butchart, K. M. A. Chan, L. A. Garibaldi, K. Ichii, J. Liu, S. M. Subramanian, G. F. Midgley, P. Miloslavich, Z. Molnár, D. Obura, A. Pfaff, S. Polasky, A. Purvis, J. Razzaque, B. Reyers, R. R. Chowdhury, Y.-J. Shin, I. Visseren-Hamakers, K. J. Willis, C. N. Zayas, Pervasive human-driven decline of life on Earth points to the need for transformative change. *Science* **366**, eaax3100 (2019).
2. Intergovernmental Science-Policy Platform on Biodiversity and Ecosystem Services, *Global Assessment Report on Biodiversity and Ecosystem Services of the Intergovernmental Science-Policy Platform on Biodiversity and Ecosystem Services* (IPBES Secretariat, 2019).
3. IUCN, *IUCN Redlist of Threatened Species* (2022); <https://iucnredlist.org/>.
4. A. Estrada, P. A. Garber, A. B. Rylands, C. Roos, E. Fernandez-Duque, A. Di Fiore, K. A. Nekaris, V. Nijman, E. W. Heymann, J. E. Lambert, F. Rovero, C. Barelly, J. M. Setchell, T. R. Gillespie, R. A. Mittermeier, L. V. Arregoitia, M. de Guinea, S. Gouveia, R. Dobrovolski, S. Shanee, N. Shanee, S. A. Boyle, A. Fuentes, K. C. MacKinnon, K. R. Amato, A. L. S. Meyer, S. Wich, R. W. Sussman, R. Pan, I. Kone, B. Li, Impending extinction crisis of the world's primates: Why primates matter. *Sci. Adv.* **3**, e1600946 (2017).
5. J. F. Brodie, S. Williams, B. Garner, The decline of mammal functional and evolutionary diversity worldwide. *Proc. Natl. Acad. Sci.* **118**, e1921849118 (2021).
6. C. A. Shaffer, C. Yukuma, E. Marawanaru, P. Suse, Assessing the sustainability of Waiwai subsistence hunting in Guyana by comparison of static indices and spatially explicit, biodemographic models. *Anim. Conserv.* **21**, 148–158 (2018).
7. T. Levi, G. H. Shepard, J. Ohl-Schacherer, C. C. Wilmers, C. A. Peres, D. W. Yu, Spatial tools for modeling the sustainability of subsistence hunting in tropical forests. *Ecol. Appl.* **21**, 1802–1818 (2011).
8. D. T. Cronin, P. R. Sesink Clee, M. W. Mitchell, D. Bocuma Meñe, D. Fernández, C. Riaco, M. Fero Meñe, J. M. Esara Echube, G. W. Hearn, M. K. Gonder, Conservation strategies for understanding

and combating the primate bushmeat trade on Bioko Island, Equatorial Guinea. *Am. J. Primatol.* **79**, 22663 (2017).

9. A. Estrada, P. A. Garber, A. Chaudhary, Expanding global commodities trade and consumption place the world's primates at risk of extinction. *PeerJ* **7**, e7068 (2019).
10. A. Estrada, P. A. Garber, A. Chaudhary, Current and future trends in socio-economic, demographic and governance factors affecting global primate conservation. *PeerJ* **8**, e9816 (2020).
11. N. Urbancic, How granting Indigenous peoples' land titles contributes to forest conservation in Latin America. *Birkbeck Law Rev.* **7**, 26–57 (2020).
12. R. Fischer, F. Taubert, M. S. Müller, J. Groeneveld, S. Lehmann, T. Wiegand, A. Huth, Accelerated forest fragmentation leads to critical increase in tropical forest edge area. *Sci. Adv.* **7**, eabg7012 (2021).
13. C. L. Nunn, T. R. Gillespie, in *An Introduction to Primate Conservation*, S. A. Wich, A. J. Marshall, Eds. (Oxford Univ. Press, 2016), pp. 157–174;  
<https://oxford.universitypressscholarship.com/view/10.1093/acprof:oso/9780198703389.001.0001/acprof-9780198703389-chapter-10>.
14. F. Ascensão, D. R. Yogui, M. H. Alves, A. C. Alves, F. Abra, A. L. J. Desbiez, Preventing wildlife roadkill can offset mitigation investments in short-medium term. *Biol. Conserv.* **253**, 108902 (2021).
15. F. Ascensão, M. D'Amico, R. Barrientos, No planet for Apes? Assessing global priority areas and species affected by linear infrastructures. *Int. J. Primatol.* **43**, 57–73 (2021).
16. R. Boonratana, Asian primates in fragments: Understanding causes and consequences of fragmentation, and predicting primate population viability. *Am. J. Primatol.* **82**, e23082 (2020).
17. V. M. Toledo, in *Encyclopedia of Biodiversity* (Elsevier, ed. 2, 2013), pp. 269–278;  
[https://researchgate.net/profile/Victor-Toledo-2/publication/255585922\\_Indigenous\\_Peoples\\_and\\_Biodiversity/links/5a1d6cb0a6fdcc0af326d9e5/Indigenous-Peoples-and-Biodiversity.pdf](https://researchgate.net/profile/Victor-Toledo-2/publication/255585922_Indigenous_Peoples_and_Biodiversity/links/5a1d6cb0a6fdcc0af326d9e5/Indigenous-Peoples-and-Biodiversity.pdf).

18. UNESCO, UNESCO Atlas of the World's Languages in Danger (2020); <https://unesdoc.unesco.org/ark:/48223/pf0000380132>.
19. IWGIA, *The Indigenous World 2020* (Eks-Skolen Trykkeri, 2020); [http://iwgia.org/images/yearbook/2020/IWGIA\\_The\\_Indigenous\\_World\\_2020.pdf](http://iwgia.org/images/yearbook/2020/IWGIA_The_Indigenous_World_2020.pdf).
20. World Bank, Indigenous Peoples (2021); <https://worldbank.org/en/topic/indigenouspeoples>.
21. S. T. Garnett, N. D. Burgess, J. E. Fa, Á. Fernández-Llamazares, Z. Molnár, C. J. Robinson, J. E. M. Watson, K. K. Zander, B. Austin, E. S. Brondizio, N. F. Collier, T. Duncan, E. Ellis, H. Geyle, M. V. Jackson, H. Jonas, P. Malmer, B. McGowan, A. Sivongxay, I. Leiper, A spatial overview of the global importance of Indigenous lands for conservation. *Nat. Sustain.* **1**, 369–374 (2018).
22. J. E. Fa, J. E. M. Watson, I. Leiper, P. Potapov, T. D. Evans, N. D. Burgess, Z. Molnár, Á. Fernández-Llamazares, T. Duncan, S. Wang, B. J. Austin, H. Jonas, C. J. Robinson, P. Malmer, K. K. Zander, M. V. Jackson, E. Ellis, E. S. Brondizio, S. T. Garnett, Importance of Indigenous Peoples' lands for the conservation of intact forest landscapes. *Front. Ecol. Environ.* **18**, 135–140 (2020).
23. C. J. O'Bryan, S. T. Garnett, J. E. Fa, I. Leiper, J. A. Rehbein, Á. Fernández-Llamazares, M. V. Jackson, H. D. Jonas, E. S. Brondizio, N. D. Burgess, C. J. Robinson, K. K. Zander, Z. Molnár, O. Venter, J. E. M. Watson, The importance of Indigenous Peoples' lands for the conservation of terrestrial mammals. *Conserv. Biol.* **35**, 1002–1008 (2020).
24. M.-S. Fletcher, R. Hamilton, W. Dressler, L. Palmer, Indigenous knowledge and the shackles of wilderness. *Proc. Natl. Acad. Sci.* **118**, e2022218118 (2021).
25. D. Mamo, K. Wessendorf, in *The Indigenous World 2020*, D. Mamo, Ed. (Eks-Skolen Trykkeri, 2020), pp. 6–23.
26. W. S. Walker, S. R. Gorelik, A. Baccini, J. L. Aragon-Osejo, C. Josse, C. Meyer, M. N. Macedo, C. Augusto, S. Rios, T. Katan, A. A. de Souza, S. Cuellar, A. Llanos, I. Zager, G. D. Mirabal, K. K. Solvik, M. K. Farina, P. Moutinho, S. Schwartzman, The role of forest conversion, degradation, and

disturbance in the carbon dynamics of Amazon indigenous territories and protected areas. *Proc. Natl. Acad. Sci.* **117**, 3015–3025 (2020).

27. N. Harris, D. Gibbs, *Forests Absorb Twice As Much Carbon As They Emit Each Year* (World Resources Institute, 2021); <https://wri.org/insights/forests-absorb-twice-much-carbon-they-emit-each-year>.
28. E. C. Ellis, N. Gauthier, K. Klein Goldewijk, R. Bliege Bird, N. Boivin, S. Díaz, D. Q. Fuller, J. L. Gill, J. O. Kaplan, N. Kingston, H. Locke, C. N. H. McMichael, D. Ranco, T. C. Rick, M. R. Shaw, L. Stephens, J.-C. Svenning, J. E. M. Watson, People have shaped most of terrestrial nature for at least 12,000 years. *Proc. Natl. Acad. Sci.* **118**, e2023483118 (2021).
29. Á. Fernández-Llamazares, P. K. Virtanen, Game masters and Amazonian Indigenous views on sustainability. *Curr. Opin. Environ. Sustain.* **43**, 21–27 (2020).
30. R. E. Kasperson, K. Dow, E. R. M. Archer, D. Cáceres, T. E. Downing, T. Elmqvist, S. Eriksen, C. Folke, G. Han, K. Iyengar, C. Vogel, K. A. Wilson, G. Ziervogel, in *Ecosystems and Human Well-being: Current State and Trends*, R. Norgaard, D. Rapport, Eds. (Island Press, 2005), vol. 56, pp. 143–164.
31. R. Schuster, R. R. Germain, J. R. Bennett, N. J. Reo, P. Arcese, Vertebrate biodiversity on indigenous-managed lands in Australia, Brazil, and Canada equals that in protected areas. *Environ. Sci. Policy* **101**, 1–6 (2019).
32. D. R. Piperno, C. H. McMichael, N. C. A. Pitman, J. E. Guevara Andino, M. R. Paredes, B. M. Heijink, L. A. Torres-Montenegro, A 5,000-year vegetation and fire history for *tierra firme* forests in the Medio Putumayo-Algodón watersheds, northeastern Peru. *Proc. Natl. Acad. Sci.* **118**, e2022213118 (2021).
33. E. Salmón, Kincentric ecology: Indigenous perceptions of the human-nature relationship. *Ecol. Appl.* **10**, 1327–1332 (2000).

34. N. Redvers, Y. Celidwen, C. Schultz, O. Horn, C. Githaiga, M. Vera, M. Perdrisat, L. Mad Plume, D. Kobei, M. C. Kain, A. Poelina, J. N. Rojas, B. Blondin, The determinants of planetary health: An Indigenous consensus perspective. *Lancet Planet. Heal.* **6**, e156–e163 (2022).
35. J. Franco-Moraes, A. F. M. B. Baniwa, F. R. C. Costa, H. P. Lima, C. R. Clement, G. H. Shepard, Historical landscape domestication in ancestral forests with nutrient-poor soils in northwestern Amazonia. *For. Ecol. Manage.* **446**, 317–330 (2019).
36. G. Odonne, M. van den Bel, M. Burst, O. Brunaux, M. Bruno, E. Dambrine, D. Davy, M. Desprez, J. Engel, B. Ferry, V. Freycon, P. Grenand, S. Jérémie, M. Mestre, J. F. Molino, P. Petronelli, D. Sabatier, B. Hérault, Long-term influence of early human occupations on current forests of the Guiana Shield. *Ecology* **100**, e02806 (2019).
37. H. S. Grantham, A. Duncan, T. D. Evans, K. R. Jones, H. L. Beyer, R. Schuster, J. Walston, J. C. Ray, J. G. Robinson, M. Callow, T. Clements, H. M. Costa, A. DeGemmis, P. R. Elsen, J. Ervin, P. Franco, E. Goldman, S. Goetz, A. Hansen, E. Hofsvang, P. Jantz, S. Jupiter, A. Kang, P. Langhammer, W. F. Laurance, S. Lieberman, M. Linkie, Y. Malhi, S. Maxwell, M. Mendez, R. Mittermeier, N. J. Murray, H. Possingham, J. Radachowsky, S. Saatchi, C. Samper, J. Silverman, A. Shapiro, B. Strassburg, T. Stevens, E. Stokes, R. Taylor, T. Tear, R. Tizard, O. Venter, P. Visconti, S. Wang, J. E. M. Watson, Anthropogenic modification of forests means only 40% of remaining forests have high ecosystem integrity. *Nat. Commun.* **11**, 5978 (2020).
38. R. S. Voss, D. W. Fleck, Mammalian diversity and mites ethnomammalogy in amazonian peru part 1: Primates. *Bull. Am. Mus. Nat. Hist.* **351**, 1–81 (2011).
39. A. Fuentes, Ethnoprimateology and the anthropology of the human-primate interface. *Ann. Rev. Anthropol.* **41**, 101–117 (2012).
40. H. E. Parathian, M. R. McLennan, C. M. Hill, A. Frazão-Moreira, K. J. Hockings, Breaking through disciplinary barriers: Human–wildlife interactions and multispecies ethnography. *Int. J. Primatol.* **39**, 749–775 (2018).

41. J. P. Boubli, B. Urbani, H. Caballero-Arias, G. H. Shepard, M. Lizarralde, in *Neotropical Ethnoprimatology. Ethnobiology*, B. Urbani, M. Lizarralde, Eds. (Springer, 2020), pp. 199–224; [http://link.springer.com/10.1007/978-3-030-27504-4\\_9](http://link.springer.com/10.1007/978-3-030-27504-4_9).
42. P. Potapov, M. C. Hansen, L. Laestadius, S. Turubanova, A. Yaroshenko, C. Thies, W. Smith, I. Zhuravleva, A. Komarova, S. Minnemeyer, E. Esipova, The last frontiers of wilderness: Tracking loss of intact forest landscapes from 2000 to 2013. *Sci. Adv.* **3**, e1600821 (2017).
43. World Bank, *Population Density* (2020); <https://data.worldbank.org/indicator/EN.POP.DNST>.
44. T. Levi, G. H. Shepard, J. Ohi-Schacherer, C. A. Peres, D. W. Yu, Modelling the long-term sustainability of indigenous hunting in Manu National Park, Peru: Landscape-scale management implications for Amazonia. *J. Appl. Ecol.* **46**, 804–814 (2009).
45. E. L. Bennett, J. G. Robinson, “Hunting of wildlife in tropical forests: Implications for biodiversity and forest peoples” (Biodiversity Series, 2000); <https://openknowledge.worldbank.org/bitstream/handle/10986/18297/multi0page.pdf?sequence=1&isAllowed=y>.
46. B. Albert, F. Le Tourneau, Ethnogeography and resource use among the Yanomami. *Curr. Anthropol.* **48**, 584–592 (2007).
47. J. R. Allan, J. E. M. Watson, M. Di Marco, C. J. O’Byrne, H. P. Possingham, S. C. Atkinson, O. Venter, Hotspots of human impact on threatened terrestrial vertebrates. *PLOS Biol.* **17**, e3000158 (2019).
48. T. M. Brooks, S. L. Pimm, H. R. Akçakaya, G. M. Buchanan, S. H. M. Butchart, W. Foden, C. Hilton-Taylor, M. Hoffmann, C. N. Jenkins, L. Joppa, B. V. Li, V. Menon, N. Ocampo-Peñuela, C. Rondinini, Measuring terrestrial area of habitat (AOH) and its utility for the IUCN Red list. *Trends Ecol. Evol.* **34**, 977–986 (2019).
49. IUCN Standards and Petitions Committee, Guidelines for Using the IUCN Red List Categories and Criteria (2022); <https://iucnredlist.org/resources/redlistguidelines>.



50. UNEP-WCMC and IUCN, *Protected Planet: The World Database on Protected Areas (WDPA)* (2020); <https://protectedplanet.net/>.
51. ILO, in *Convention Concerning Indigenous and Tribal Peoples in Independent Countries* (ILO, 1989); [https://ilo.org/dyn/normlex/en/f?p=NORMLEXPUB:12100:0::NO::P12100\\_INSTRUMENT\\_ID:312314](https://ilo.org/dyn/normlex/en/f?p=NORMLEXPUB:12100:0::NO::P12100_INSTRUMENT_ID:312314).
52. C. D. Golden, J. Comaroff, The human health and conservation relevance of food taboos in northeastern Madagascar. *Ecol. Soc.* **20**, art42 (2015).
53. M. Tengö, K. Johansson, F. Rakotondrasoa, J. Lundberg, J. A. Andriamaherilala, J. A. Rakotoarisoa, T. Elmqvist, Taboos and forest governance: Informal protection of hot spot dry forest in southern Madagascar. *Ambio* **36**, 683–691 (2007).
54. R. Rocha, Á. Fernández-Llamazares, A. López-Baucells, S. F. M. Andriamitandrina, Z. E. Andriatafika, E. M. Temba, L. Torrent, D. Burgas, M. Cabeza, Human-bat interactions in rural Southwestern Madagascar through a biocultural lens. *J. Ethnobiol.* **41**, 53–69 (2021).
55. V. M. Toledo, B. F. Ortiz-Espejel, L. Cortés, P. Moguel, M. de J. Ordoñez, The multiple use of tropical forests by indigenous peoples in Mexico: A case of adaptive management. *Conserv. Ecol.* **7**, art9 (2003).
56. V. Reyes-García, Á. Fernández-Llamazares, Y. Aumeeruddy-Thomas, P. Benyei, R. W. Bussmann, S. K. Diamond, D. García-del-Amo, S. Guadilla-Sáez, N. Hanazaki, N. Kosoy, M. Lavides, A. C. Luz, P. McElwee, V. J. Meretsky, T. Newberry, Z. Molnár, I. Ruiz-Mallén, M. Salpeteur, F. S. Wyndham, F. Zorondo-Rodriguez, E. S. Brondizio, Recognizing Indigenous peoples' and local communities' rights and agency in the post-2020 biodiversity agenda. *Ambio* **51**, 84–92 (2022).
57. C. G. Armstrong, J. E. D. Miller, A. C. McAlvay, P. M. Ritchie, D. Lepofsky, Historical indigenous land-use explains plant functional trait diversity. *Ecol. Soc.* **26**, art6 (2021).
58. V. Reyes-García, P. Benyei, Indigenous knowledge for conservation. *Nat. Sustain.* **2**, 657–658 (2019).

59. J. D. Ford, N. King, E. K. Galappaththi, T. Pearce, G. McDowell, S. L. Harper, The resilience of indigenous peoples to environmental change. *One Earth* **2**, 532–543 (2020).
60. R. Hill, Ç. Adem, W. V. Alangui, Z. Molnár, Y. Aumeeruddy-Thomas, P. Bridgewater, M. Tengö, R. Thaman, C. Y. Adou Yao, F. Berkes, J. Carino, M. Carneiro da Cunha, M. C. Diaw, S. Díaz, V. E. Figueroa, J. Fisher, P. Hardison, K. Ichikawa, P. Kariuki, M. Karki, P. O. Lyver, P. Malmer, O. Masardule, A. A. Oteng Yeboah, D. Pacheco, T. Pataridze, E. Perez, M.-M. Roué, H. Roba, J. Rubis, O. Saito, D. Xue, Working with Indigenous, local and scientific knowledge in assessments of nature and nature's linkages with people. *Curr. Opin. Environ. Sustain.* **43**, 8–20 (2020).
61. R. Cámara-Leret, J. Bascompte, Language extinction triggers the loss of unique medicinal knowledge. *Proc. Natl. Acad. Sci.* **118**, e2103683118 (2021).
62. Á. Fernández-Llamazares, D. Lepofsky, K. Lertzman, C. G. Armstrong, E. S. Brondizio, M. C. Gavin, P. O. Lyver, G. P. Nicholas, P. Pascua, N. J. Reo, V. Reyes-García, N. J. Turner, J. Yletyinen, E. N. Anderson, W. Balée, J. Cariño, D. M. David-Chavez, C. P. Dunn, S. C. Garnett, S. Greening (La'goot), S. Jackson (NiniwumSelapem), H. Kuhnlein, Z. Molnár, G. Odonne, G.-B. Retter, W. J. Ripple, L. Sáfián, A. S. Bahraman, M. Torrents-Ticó, M. B. Vaughan, Scientists' warning to humanity on threats to indigenous and local knowledge systems. *J. Ethnobiol.* **41**, 144–169 (2021).
63. G. H. Shepard, in *Primates Face to Face* (Cambridge Univ. Press, 2002), pp. 101–136; [https://cambridge.org/core/product/identifier/CBO9780511542404A017/type/book\\_part](https://cambridge.org/core/product/identifier/CBO9780511542404A017/type/book_part).
64. E. H. Allison, V. Cho, River conservation by an Indigenous community. *Nature* **588**, 589–590 (2020).
65. A. A. Koning, K. M. Perales, E. Fluet-Chouinard, P. B. McIntyre, A network of grassroots reserves protects tropical river fish diversity. *Nature* **588**, 631–635 (2020).
66. A. J. Vuohelainen, L. Coad, T. R. Marthews, Y. Malhi, T. J. Killeen, The effectiveness of contrasting protected areas in preventing deforestation in Madre de Dios, Peru. *Environ. Manage.* **50**, 645–663 (2012).

67. A. Blackman, L. Corral, E. S. Lima, G. P. Asner, Titling indigenous communities protects forests in the Peruvian Amazon. *Proc. Natl. Acad. Sci.* **114**, 4123–4128 (2017).
68. Environmental Defense Fund, *Amazonian Indigenous Peoples Territories and Their Forests Related to Climate Change: Analyses and Policy Options* (2017); <https://edf.org/sites/default/files/indigenous-territories-barrier-to-deforestation.pdf>.
69. Á. Fernández-Llamazares, M. Garteizgogeoascoa, N. Basu, E. S. Brondizio, M. Cabeza, J. Martínez-Alier, P. McElwee, V. Reyes-García, A state-of-the-art review of indigenous peoples and environmental pollution. *Integr. Environ. Assess. Manag.* **16**, 324–341 (2020).
70. R. A. Begotti, C. A. Peres, Rapidly escalating threats to the biodiversity and ethnocultural capital of Brazilian Indigenous Lands. *Land Use Policy* **96**, 104694 (2020).
71. D. Nepstad, S. Schwartzman, B. Bamberger, M. Santilli, D. Ray, P. Schlesinger, P. Lefebvre, A. Alencar, E. Prinz, G. Fiske, A. Rolla, Inhibition of Amazon deforestation and fire by parks and indigenous lands. *Conserv. Biol.* **20**, 65–73 (2006).
72. D. Gonçalves-Souza, B. Vilela, B. Phalan, R. Dobrovolski, The role of protected areas in maintaining natural vegetation in Brazil. *Sci. Adv.* **7**, eabh29932 (2021).
73. D. Kopenawa, B. Albert, *The Falling Sky: Words of a Yanomami Shaman* (Belknap Press, 2013).
74. L. Gibson, T. M. Lee, L. P. Koh, B. W. Brook, T. A. Gardner, J. Barlow, C. A. Peres, C. J. A. Bradshaw, W. F. Laurance, T. E. Lovejoy, N. S. Sodhi, Primary forests are irreplaceable for sustaining tropical biodiversity. *Nature* **478**, 378–381 (2011).
75. H. Bernard, R. Bili, I. Matsuda, G. Hanya, O. R. Wearn, A. Wong, A. H. Ahmad, Species richness and distribution of primates in disturbed and converted forest landscapes in Northern Borneo. *Trop. Conserv. Sci.* **9**, 194008291668010 (2016).
76. J. M. de Almeida-Rocha, C. A. Peres, L. C. Oliveira, Primate responses to anthropogenic habitat disturbance: A pantropical meta-analysis. *Biol. Conserv.* **215**, 30–38 (2017).

77. Á. Fernández-Llamazares, J. Terraube, M. C. Gavin, A. Pyhälä, S. M. O. Siani, M. Cabeza, E. S. Brondizio, Reframing the wilderness concept can bolster collaborative conservation. *Trends Ecol. Evol.* **35**, 750–753 (2020).
78. F. Berkes, J. Colding, C. Folke, Rediscovery of traditional ecological knowledge as adaptive management. *Ecol. Appl.* **10**, 1251–1262 (2000).
79. F. Berkes, *Sacred Ecology* (Taylor & Francis, 2008).
80. D. Arora, G. H. Shepard, Mushrooms and economic botany. *Econ. Bot.* **62**, 207–212 (2008).
81. H. V. Kuhnlein, B. Erasmus, D. Spigelski, *Indigenous Peoples' Food Systems: The Many Dimensions of Culture, Diversity and Environment for Nutrition and Health* (FAO, 2009).
82. G. H. Shepard Jr, T. Levi, E. G. Neves, C. A. Peres, D. W. Yu, Hunting in ancient and modern Amazonia: Rethinking sustainability. *Am. Anthropol.* **114**, 652–667 (2012).
83. J. C. B. Pezzuti, J. P. Lima, D. F. da Silva, A. Begossi, Uses and taboos of turtles and tortoises along rio Negro, Amazon Basin. *J. Ethnobiol.* **30**, 153–168 (2010).
84. J. A. F. Diniz-Filho, Macroecological analyses support an overkill scenario for late Pleistocene extinctions. *Brazilian J. Biol.* **64**, 407–414 (2004).
85. A. L. Wolfe, J. M. Broughton, A foraging theory perspective on the associational critique of North American Pleistocene overkill. *J. Archaeol. Sci.* **119**, 105162 (2020).
86. L. Cormier, A preliminary review of neotropical primates in the subsistence and symbolism of indigenous lowland South American peoples. *Ecol. Environ. Anthropol.* **2**, 14–32 (2006).
87. C. Cartelle, W. C. Hartwig, A new extinct primate among the Pleistocene megafauna of Bahia, Brazil. *Proc. Natl. Acad. Sci.* **93**, 6405–6409 (1996).
88. W. Balée, V. Honorato de Oliveira, R. dos Santos, M. Amaral, B. Rocha, N. Guerrero, S. Schwartzman, M. Torres, J. Pezzuti, Ancient transformation, current conservation: Traditional forest management on the Iri River, Brazilian Amazonia. *Hum. Ecol.* **48**, 1–15 (2020).

89. A. Jerozolinski, C. A. Peres, Bringing home the biggest bacon: A cross-site analysis of the structure of hunter-kill profiles in Neotropical forests. *Biol. Conserv.* **111**, 415–425 (2003).
90. B. De Thoisy, V. Lacoste, A. Germain, J. Muñoz-Jordán, C. Colón, J.-F. Mauffrey, M. Delaval, F. Catzeflis, M. Kazanji, S. Matheus, P. Dussart, J. Morvan, A. A. Setién, X. Deparis, A. Lavergne, Dengue infection in neotropical forest mammals. *Vector Borne Zoonotic Dis.* **9**, 157–170 (2009).
91. C. Borgerson, B. L. Fisher, B. N. Razafindrapaoly, B. J. R. Rasolofoniaina, J. M. Randriamanetsy, B. L. Razafindrapaoly, D. Rajaona, P. Herrera, J. Van Itterbeeck, K. M. Martinez, M. L. Aardema, A nutrient-rich traditional insect for improving food security and reducing biodiversity loss in Madagascar and sub-Saharan Africa. *Conserv. Sci. Pract.* **3**, e480 (2021).
92. M. Franzen, Evaluating the sustainability of hunting: A comparison of harvest profiles across three Huaorani communities. *Environ. Conserv.* **33**, 36–45 (2006).
93. S. Papworth, in *Ethnoprimateology*, M. T. Waller, Ed. (Springer International Publishing, 2016), pp. 95–115.
94. C. A. Shaffer, M. S. Milstein, C. Yukuma, E. Marawanaru, P. Suse, Sustainability and comanagement of subsistence hunting in an indigenous reserve in Guyana. *Conserv. Biol.* **31**, 1119–1131 (2017).
95. C. Shaffer, E. Marawanaru, C. Yukuma, in *Ethnoprimateology: A Practical Guide to Research at the Human-Nonhuman Interface*, K. M. Dore, E. P. Riley, A. Fuentes, Eds. (Cambridge Univ. Press, 2016), pp. 232–250.
96. R. R. De Souza-Mazurek, T. Pedrinho, X. Feliciano, W. Hilário, S. Gerônimo, E. Marcelo, Subsistence hunting among the Waimiri Atroari Indians in central Amazonia, Brazil. *Biodivers. Conserv.* **9**, 579–596 (2000).
97. C. A. Peres, H. S. Nascimento, Impact of game hunting by the Kayapó of south-eastern Amazonia: Implications for wildlife conservation in tropical forest indigenous reserves. *Biodivers. Conserv.* **15**, 2627–2653 (2006).

98. P. Erikson, in *Beyond the Visible and the Material: The Amerindianization of Society in the Work of Peter Rivière*, L. Rival, N. Whitehead, Eds. (Oxford Univ. Press, 2001), pp. 101–121.
99. G. Zapata-Ríos, C. Urgilés, E. Suárez, Mammal hunting by the Shuar of the Ecuadorian Amazon: Is it sustainable? *Oryx* **43**, 375 (2009).
100. J. Ohl-Schacherer, G. H. Shepard, H. Kaplan, C. A. Peres, T. Levi, D. W. Yu, The sustainability of subsistence hunting by matsigenka native communities in Manu National Park, Peru. *Conserv. Biol.* **21**, 1174–1185 (2007).
101. N. Shanee, S. Shanee, A. M. Maldonado, Conservation assessment and planning for the yellow tailed woolly monkey (*Oreonax flavicauda*) in Peru. *Wildl. Biol. Pract.* **3**, 73–82 (2007).
102. A. Sirén, J. Machoa, Fish, wildlife, and human nutrition in tropical forests: A fat gap? *Interciencia* **33**, 186–193 (2008).
103. J. E. Fa, J. Olivero, M. A. Farfán, J. Lewis, H. Yasuoka, A. Noss, S. Hattori, M. Hirai, T. O. W. Kamgaing, G. Carpaneto, F. Germi, A. L. Márquez, J. Duarte, R. Duda, S. Gallois, M. Riddell, R. Nasi, Differences between pygmy and non-pygmy hunting in Congo Basin forests. *PLOS ONE* **11**, e0161703 (2016).
104. R. Nasi, A. Taber, N. Van Vliet, Empty forests, empty stomachs? Bushmeat and livelihoods in the Congo and Amazon Basins. *Int. For. Rev.* **13**, 355–368 (2011).
105. K. A. Abernethy, L. Coad, G. Taylor, M. E. Lee, F. Maisels, Extent and ecological consequences of hunting in Central African rainforests in the twenty-first century. *Philos. Trans. R. Soc. B Biol. Sci.* **368**, 20120303 (2013).
106. F. Petrozzi, G. Amori, D. Franco, P. Gaubert, N. Pacini, E. A. Eniang, G. C. Akani, E. Politano, L. Luiselli, Ecology of the bushmeat trade in west and central Africa. *Trop. Ecol.* **57**, 545–557 (2016).
107. R. T. Corlett, The impact of hunting on the mammalian fauna of tropical asian forests. *Biotropica* **39**, 292–303 (2007).

108. T. M. Lee, A. Sigouin, M. Pinedo-Vasquez, R. Nasi, “The harvest of wildlife for bushmeat and traditional medicine in East, South and Southeast Asia” (Occasional Paper 115, 2014).
109. M. R. Nielsen, H. Meilby, C. Smith-Hall, M. Pouliot, T. Treue, The importance of wild meat in the global south. *Ecol. Econ.* **146**, 696–705 (2018).
110. H. Nooren, G. Claridge, *Wildlife Trade in Laos: The End of the Game* (IUCN-The World Conservation Union, 2001).
111. M. Rao, T. Myint, T. Zaw, S. Htun, Hunting patterns in tropical forests adjoining the Hkakaborazi National Park, north Myanmar. *Oryx* **39**, 292–300 (2005).
112. V. Nijman, Decline of the endemic Hose’s langur *Presbytis hosei* in Kayan Mentarang National Park, East Borneo. *Oryx* **39**, 223–226 (2005).
113. V. P. W. Loke, T. Lim, A. Campos-Arceiz, Hunting practices of the Jahai indigenous community in northern peninsular Malaysia. *Glob. Ecol. Conserv.* **21**, e00815 (2020).
114. A. J. Marshall, Nardiyono, L. M. Engström, B. Pamungkas, J. Palapa, E. Meijaard, S. A. Stanley, The blowgun is mightier than the chainsaw in determining population density of Bornean orangutans (*Pongo pygmaeus morio*) in the forests of East Kalimantan. *Biol. Conserv.* **129**, 566–578 (2006).
115. V. Nijman, K. Nekaris, Traditions, taboos and trade in slow lorises in Sundanese communities in southern Java, Indonesia. *Endanger. Species Res.* **25**, 79–88 (2014).
116. D. S. Wilkie, E. L. Bennett, C. A. Peres, A. A. Cunningham, The empty forest revisited. *Ann. N. Y. Acad. Sci.* **1223**, 120–128 (2011).
117. L. Coad, J. E. Fa, K. Abernethy, N. Van Vliet, C. Santamaria, D. Wilkie, H. R. El Bizri, D. J. Ingram, D.-M. Cawthorn, R. Nasi, *Toward A Sustainable, Participatory and Inclusive Wild Meat Sector* (CIFOR, 2019); <https://onlinelibrary.wiley.com/doi/10.1111/j.1749-6632.2010.05908.x>.
118. P. Siriwat, K. A. I. Nekaris, V. Nijman, The role of the anthropogenic Allee effect in the exotic pet trade on Facebook in Thailand. *J. Nat. Conserv.* **51**, 125726 (2019).

119. M. A. Norconk, S. Atsalis, G. Tully, A. M. Santillán, S. Waters, C. D. Knott, S. R. Ross, S. Shanee, D. Stiles, Reducing the primate pet trade: Actions for primatologists. *Am. J. Primatol.* **82**, 1–9 (2020).
120. K. H. Redford, J. G. Robinson, in *Latin America Mammology: History, Biodiversity, and Conservation*, M. A. Mares, D. J. Schmidly, Eds. (University of Oklahoma Press, 1991), pp. 227–237.
121. C. A. Peres, Effects of subsistence hunting on vertebrate community structure in Amazonian forests. *Conserv. Biol.* **14**, 240–253 (2000).
122. C. H. Freese, P. G. Heltne, C. R. Napoleon, G. Whitesides, Patterns and determinants of monkey densities in Peru and Bolivia, with notes on distributions. *Int. J. Primatol.* **3**, 53–90 (1982).
123. C. A. Peres, Indigenous reserves and nature conservation in Amazonian forests. *Conserv. Biol.* **8**, 586–588 (1994).
124. B. de Thoisy, F. Renoux, C. Julliot, Hunting in northern French Guiana and its impact on primate communities. *Oryx* **39**, 149–157 (2005).
125. W. J. Ripple, K. Abernethy, M. G. Betts, G. Chapron, R. Dirzo, M. Galetti, T. Levi, P. A. Lindsey, D. W. Macdonald, B. Machovina, T. M. Newsome, C. A. Peres, A. D. Wallach, C. Wolf, H. Young, Bushmeat hunting and extinction risk to the world’s mammals. *R. Soc. Open Sci.* **3**, 160498 (2016).
126. S. Espinosa, L. C. Branch, R. Cueva, Road development and the geography of hunting by an Amazonian Indigenous Group: Consequences for wildlife conservation. *PLOS ONE* **9**, e114916 (2014).
127. N. van Vliet, M. P. Quiceno-Mesa, D. Cruz-Antia, L. J. N. de Aquino, J. Moreno, R. Nasi, The uncovered volumes of bushmeat commercialized in the Amazonian trifrontier between Colombia, Peru and Brazil. *Ethnobiol. Conserv.* **3**, 1–11 (2014).
128. C. A. Peres, E. Palacios, Basin-wide effects of game harvest on vertebrate population densities in Amazonian forests: Implications for animal-mediated seed dispersal. *Biotropica* **39**, 304–315 (2007).



129. M. S. Alvard, J. G. Robinson, K. H. Redford, H. Kaplan, The sustainability of subsistence hunting in the neotropics La Sustentabilidad de la Caza de Subsistencia en el Neotropico. *Conserv. Biol.* **11**, 977–982 (1997).
130. J. E. Fa, J. E. García Yuste, Commercial bushmeat hunting in the Monte Mitra forests, Equatorial Guinea: Extent and impact. *Anim. Biodivers. Conserv.* **24**, 31–52 (2001).
131. A. C. Luz, J. Paneque-Gálvez, M. Guèze, J. Pino, M. J. Macía, M. Orta-Martínez, V. Reyes-García, Continuity and change in hunting behaviour among contemporary indigenous peoples. *Biol. Conserv.* **209**, 17–26 (2017).
132. E. Suarez, G. Zapata-Ríos, Managing subsistence hunting in the changing landscape of Neotropical rain forests. *Biotropica* **51**, 282–287 (2019).
133. C. A. Peres, T. Emilio, J. Schietti, S. J. M. Desmoulière, T. Levi, Dispersal limitation induces long-term biomass collapse in overhunted Amazonian forests. *Proc. Natl. Acad. Sci.* **113**, 892–897 (2016).
134. R. Bodmer, P. Mayor, M. Antunez, T. Fang, K. Chota, T. A. Yuyarima, S. Flores, B. Cosgrove, N. López, O. Pizuri, P. Puertas, Wild meat species, climate change, and indigenous Amazonians. *J. Ethnobiol.* **40**, 218–233 (2020).
135. E. Avila Martin, G. Ros Brull, S. M. Funk, L. Luiselli, R. Okale, J. E. Fa, Wild meat hunting and use by sedentarised Baka Pygmies in southeastern Cameroon. *PeerJ* **8**, e9906 (2020).
136. W. R. Townsend, R. B. Wallace, K. Lara-Delgado, G. Miranda-Chumacero, in *Neotropical Ethnoprimatology. Ethnobiology*, B. Urbani, M. Lizarralde, Eds. (Springer, 2020), pp. 343–362; [http://link.springer.com/10.1007/978-3-030-27504-4\\_17](http://link.springer.com/10.1007/978-3-030-27504-4_17).
137. M. N. F. da Silva, G. H. Shepard, D. W. Yu, Conservation implications of primate hunting practices among the Matsigenka of Manu National Park. *Neotrop. Primates* **13**, 31 (2005).

138. A. Luz, M. Guèze, J. Paneque-Gálvez, J. Pino, M. Macía, M. Orta-Martínez, V. Reyes-García, How does cultural change affect indigenous peoples' hunting activity? An empirical study among the 'tsimane' in the Bolivian Amazon. *Conserv. Soc.* **13**, 382 (2015).
139. E. J. Naranjo, M. M. Guerra, R. E. Bodmer, J. E. Bolaños, Subsistence hunting by three ethnic groups of the lacandon forest, Mexico. *J. Ethnobiol.* **24**, 233–253 (2004).
140. R. Duda, S. Gallois, V. Reyes-Garcia, Hunting techniques, wildlife offtake and market integration. A perspective from individual variations among the baka (Cameroon). *Afr. Study Monogr.* **38**, 97–118 (2017).
141. A. Köhler, Of apes and men: Baka and Bantu attitudes to wildlife and the making of eco-goodies and baddies. *Conserv. Soc.* **3**, 407–435 (2005).
142. F. Kohler, E. S. Brondizio, Considering the needs of indigenous and local populations in conservation programs. *Conserv. Biol.* **31**, 245–251 (2017).
143. T. Oishi, Human-gorilla and gorilla-human: Dynamics of human-animal boundaries and interethnic relationships in the central African rainforest<sup>1</sup>. *Rev. Primatol.* (2013).
144. C. Shaffer, E. Marawanaru, C. Yukuma, in *Ethnoprimateology: A Practical Guide to Research at the Human-Nonhuman Interface*, K. M. Dore, E. P. Riley, A. Fuentes, Eds. (Cambridge Univ. Press, 2017), pp. 232–250.
145. C. A. Shaffer, M. S. Milstein, P. Suse, E. Marawanaru, C. Yukuma, in *Primate Research and Conservation in the Anthropocene*, A. M. Behie, J. A. Teichrobe, N. Malone, Eds. (Cambridge Univ. Press, 2019), pp. 74–98.
146. A. P. Antunes, R. M. Fewster, E. M. Venticinque, C. A. Peres, T. Levi, F. Rohe, G. H. Shepard, Empty forest or empty rivers? A century of commercial hunting in Amazonia. *Sci. Adv.* **2**, e1600936 (2016).

147. J. M. Read, J. M. V. Fragoso, K. M. Silvius, J. Luzar, H. Overman, A. Cummings, S. T. Giery, L. F. de Oliveira, Space, place, and hunting patterns among indigenous peoples of the Guyanese Rupununi Region. *J. Latin Am. Geogr.* **9**, 213–243 (2010).
148. C. Riu-Bosoms, T. Vidal, A. Duane, A. Fernandez-Llamazares Onrubia, M. Gueze, A. C. Luz, J. Paneque-Gálvez, M. J. Macia, V. Reyes-Garcia, Exploring indigenous landscape classification across different dimensions: A case study from the Bolivian Amazon. *Landsc. Res.* **40**, 318–337 (2015).
149. P. K. Virtanen, Ancestors' times and protection of Amazonian Indigenous biocultural heritage. *Altern. Int. J. Indig. Peoples* **15**, 330–339 (2019).
150. M. R. de Mattos Vieira, E. von Muhlen, G. Shepard, Participatory monitoring and management of subsistence hunting in the Piagaçu-Purus Reserve, Brazil. *Conserv. Soc.* **13**, 254 (2015).
151. IUCN-WCPA Task Force on OECMs, *Recognising and Reporting Other Effective Area-Based Conservation Measures* (IUCN, 2019).
152. CBD, in *Conference of the Parties to the Convention on Biological Diversity, Fourteenth Meeting, Agenda Item 24 CBD/COP/DEC/14/8* (CBD, 2018), p. 19; <https://cbd.int/doc/decisions/cop-14/cop-14-dec-08-en.pdf>.
153. R. A. Rasolofoson, P. J. Ferraro, C. N. Jenkins, J. P. G. Jones, Effectiveness of community forest management at reducing deforestation in Madagascar. *Biol. Conserv.* **184**, 271–277 (2015).
154. L. Jarosz, Defining and explaining tropical deforestation: Shifting cultivation and population growth in colonial Madagascar (1896-1940). *Econ. Geogr.* **69**, 366–379 (1993).
155. R. W. Sussman, G. M. Green, L. K. Sussman, Satellite imagery, human ecology, anthropology, and deforestation in Madagascar. *Hum. Ecol.* **22**, 333–354 (1994).
156. IPBES, *Global Assessment Report on Biodiversity and Ecosystem Services of the Intergovernmental Science-Policy Platform on Biodiversity and Ecosystem Services* (IPBES Secretariat, 2019).

157. O. Venter, E. W. Sanderson, A. Magrath, J. R. Allan, J. Beher, K. R. Jones, H. P. Possingham, W. F. Laurance, P. Wood, B. M. Fekete, M. A. Levy, J. E. M. Watson, Sixteen years of change in the global terrestrial human footprint and implications for biodiversity conservation. *Nat. Commun.* **7**, 12558 (2016).
158. C. A. Correa Ayram, M. E. Mendoza, A. Etter, D. R. Pérez Salicrup, Anthropogenic impact on habitat connectivity: A multidimensional human footprint index evaluated in a highly biodiverse landscape of Mexico. *Ecol. Indic.* **72**, 895–909 (2017).
159. J. E. M. Watson, K. R. Jones, R. A. Fuller, M. Di Marco, D. B. Segan, S. H. M. Butchart, J. R. Allan, E. McDonald-Madden, O. Venter, Persistent disparities between recent rates of habitat conversion and protection and implications for future global conservation targets. *Conserv. Lett.* **9**, 413–421 (2016).
160. H. L. Beyer, O. Venter, H. S. Grantham, J. E. M. Watson, Substantial losses in ecoregion intactness highlight urgency of globally coordinated action. *Conserv. Lett.* **13**, 1–9 (2020).
161. K. Baragwanath, E. Bayi, Collective property rights reduce deforestation in the Brazilian Amazon. *Proc. Natl. Acad. Sci.* **117**, 20495–20502 (2020).
162. WWF, Congo Basin (2022); <https://worldwildlife.org/places/congo-basin>.
163. S. Asher, P. Novosad, Rural roads and local economic development. *Am. Econ. Rev.* **110**, 797–823 (2018).
164. P. L. Ibisch, M. T. Hoffmann, S. Kreft, G. Pe'er, V. Kati, L. Biber-Freudenberger, D. A. DellaSala, M. M. Vale, P. R. Hobson, N. Selva, A global map of roadless areas and their conservation status. *Science* **354**, 1423–1427 (2016).
165. J. R. Meijer, M. A. J. Huijbregts, K. C. G. J. Schotten, A. M. Schipper, Global patterns of current and future road infrastructure. *Environ. Res. Lett.* **13**, 64006 (2018).
166. OECD, in *OECD Business and Finance Outlook 2018* (OECD Publishing, 2018), pp. 1–44.

167. White House, FACT SHEET: President Biden and G7 Leaders Launch Build Back Better World (B3W) Partnership (2021); <https://whitehouse.gov/briefing-room/statements-releases/2021/06/12/fact-sheet-president-biden-and-g7-leaders-launch-build-back-better-world-b3w-partnership/>.
168. European Commission, Global Gateway: Up to € 300 billion for the European Union's strategy to boost sustainable links around the world, press release (2021), p. 3.
169. C. Kis Madrid, G. M. Hickey, M. A. Bouchard, Strategic environmental assessment effectiveness and the initiative for the integration of regional infrastructure in South America (IIRSA): A multiple case review. *J. Environ. Assess. Policy Manag.* **13**, 515–540 (2011).
170. A. C. Hughes, Understanding and minimizing environmental impacts of the Belt and Road Initiative. *Conserv. Biol.* **33**, 883–894 (2019).
171. A. C. Hughes, A. M. Lechner, A. Chitov, A. Horstmann, A. Hinsley, A. Tritto, A. Chariton, B. V. Li, D. Ganapin, E. Simonov, K. Morton, K. Toktomushev, M. Foggin, M. Tan-Mullins, M. C. Orr, R. Griffiths, R. Nash, S. Perkin, R. Glémet, M. Kim, D. W. Yu, Horizon scan of the Belt and Road initiative. *Trends Ecol. Evol.* **35**, 583–593 (2020).
172. S. Sloan, M. Alamgir, M. J. Campbell, T. Setyawati, W. F. Laurance, Development corridors and remnant-forest conservation in Sumatra, Indonesia. *Trop. Conserv. Sci.* **12**, 194008291988950 (2019).
173. F. Ascensão, B. B. Niebuhr, A. M. Moraes, B. R. Alexandre, J. C. Assis, M. A. Alves-Eigenheer, J. W. Ribeiro, M. M. Morais, A. F. Martins, A. Oliveira, E. Moraes, J. H. Ramos, M. L. Lorini, L. P. Ferraz, L. Culot, J. M. Dietz, C. R. Ruiz-Miranda, M. C. Ribeiro, End of the line for the golden lion tamarin? A single road threatens 30 years of conservation efforts. *Conserv. Sci. Pract.* **1**, e89 (2019).
174. L. Grandia, Road Mapping: Megaprojects and land grabs in the northern Guatemalan lowlands. *Dev. Change* **44**, 233–259 (2013).
175. D. P. Edwards, S. Sloan, L. Weng, P. Dirks, J. Sayer, W. F. Laurance, Mining and the African environment. *Conserv. Lett.* **7**, 302–311 (2014).

176. C. P. Barber, M. A. Cochrane, C. M. Souza, W. F. Laurance, Roads, deforestation, and the mitigating effect of protected areas in the Amazon. *Biol. Conserv.* **177**, 203–209 (2014).
177. R. Stavenhagen, *Indigenous Peoples in Comparative Perspective—Problems and Policies* (HDOCPA-2004-14, Human Development Report Office (HDRO), United Nations Development Programme (UNDP), 2004).
178. L. P. Sales, B. R. Ribeiro, M. M. Pires, C. A. Chapman, R. Loyola, Recalculating route: Dispersal constraints will drive the redistribution of Amazon primates in the Anthropocene. *Ecography* **42**, 1789–1801 (2019).
179. E. Meijaard, S. Ni'matullah, R. Dennis, J. Sherman, Onrizal, S. A. Wich, The historical range and drivers of decline of the Tapanuli orangutan. *PLOS ONE* **16**, e0238087 (2021).
180. B. Andrasi, J. A. G. Jaeger, S. Heinicke, K. Metcalfe, K. J. Hockings, Quantifying the road-effect zone for a critically endangered primate. *Conserv. Lett.* **14**, e12839 (2021).
181. C. L. Rezende, F. R. Scarano, E. D. Assad, C. A. Joly, J. P. Metzger, B. B. N. Strassburg, M. Tabarelli, G. A. Fonseca, R. A. Mittermeier, From hotspot to hopespot: An opportunity for the Brazilian Atlantic Forest. *Perspect. Ecol. Conserv.* **16**, 208–214 (2018).
182. A. C. Lees, C. A. Peres, P. M. Fearnside, M. Schneider, J. A. S. Zuanon, Hydropower and the future of Amazonian biodiversity. *Biodivers. Conserv.* **25**, 451–466 (2016).
183. I. L. Jones, J. W. Bull, Major dams and the challenge of achieving “No Net Loss” of biodiversity in the tropics. *Sustain. Dev.* **28**, 435–443 (2020).
184. G. R. Clements, S. A. Aziz, R. Bulan, X. Giam, J. Bentrupperbaumer, M. Goosem, S. Laurance, W. F. Laurance, Not everyone wants roads: Assessing Indigenous People’s support for roads in a globally important tiger conservation landscape. *Hum. Ecol.* **46**, 909–915 (2018).
185. T. Vilela, A. Malky Harb, A. Bruner, V. Laísa da Silva Arruda, V. Ribeiro, A. Auxiliadora Costa Alencar, A. Julissa Escobedo Grandez, A. Rojas, A. Laina, R. Botero, A better Amazon road network for people and the environment. *Proc. Natl. Acad. Sci.* **117**, 7095–7102 (2020).

186. ISA, Table of Indigenous peoples, in *Povos Indígenas no Brasil* (2021); [https://pib.socioambiental.org/en/Table\\_of\\_Indigenous\\_Peoples](https://pib.socioambiental.org/en/Table_of_Indigenous_Peoples).
187. L. Bromham, R. Dinnage, H. Skirgård, A. Ritchie, M. Cardillo, F. Meakins, S. Greenhill, X. Hua, Global predictors of language endangerment and the future of linguistic diversity. *Nat. Ecol. Evol.* **6**, 163–173 (2022).
188. L. Ferrante, M. Gomes, P. M. Fearnside, Amazonian indigenous peoples are threatened by Brazil's Highway BR-319. *Land Use Policy* **94**, 104548 (2020).
189. L. Ferrante, P. M. Fearnside, The Amazon's road to deforestation. *Science* **369**, 634 (2020).
190. J. E. Engert, F. Y. Ishida, W. F. Laurance, Rerouting a major Indonesian mining road to spare nature and reduce development costs. *Conserv. Sci. Pract.* **3**, e521 (2021).
191. United Nations, United Nations Declaration on the Rights of Indigenous Peoples (United Nations, 2007); <https://un.org/development/desa/indigenouspeoples/declaration-on-the-rights-of-indigenous-peoples.html>.
192. UN, in 61/295. *United Nations Declaration on the Rights of Indigenous Peoples* (United Nations, 2007), pp. 1–29; [https://un.org/development/desa/indigenouspeoples/wp-content/uploads/sites/19/2018/11/UNDRIP\\_E\\_web.pdf](https://un.org/development/desa/indigenouspeoples/wp-content/uploads/sites/19/2018/11/UNDRIP_E_web.pdf).
193. UN, in *General Assembly GA/SHC/3891* (United Nations, 2007); <https://un.org/press/en/2007/gashc3891.doc.htm>.
194. J. C. Tresierra, *Rights of Indigenous Groups over Natural Resources in Tropical Forests* (IADB, 2020); <https://publications.iadb.org/en/rights-indigenous-groups-over-natural-resources-tropical-forests>.
195. G. Freire, M. Scharz Orellana, S. D. Zumaeta Aurazo, D. C. Costa, J. M. Ludvall, L. R. Viveros Mendoza, M. C. Lucchetti, L. L. Moreno Herrera, L. D. C. Souza, *Indigenous Latin America in the Twenty-First Century: The First Decade* (Washington D.C., 2015);

<http://documents.worldbank.org/curated/en/145891467991974540/pdf/Indigenous-Latin-America-in-the-twenty-first-century-the-first-decade.pdf>.

196. UNDESA, *Education* (United Nations Department of Economic and Social Affairs – Indigenous Peoples, 2020); <https://un.org/development/desa/indigenouspeoples/mandated-areas1/education.html>.
197. UNDESA, *Indigenous Peoples & the COVID-19 Pandemic: Considerations* (New York, NY, 2020); [https://un.org/development/desa/indigenouspeoples/wp-content/uploads/sites/19/2020/04/COVID19\\_IP\\_considerations.pdf](https://un.org/development/desa/indigenouspeoples/wp-content/uploads/sites/19/2020/04/COVID19_IP_considerations.pdf).
198. UN, *The State of World's Indigenous Peoples: Education* (United Nations, 2017); [https://un.org/development/desa/indigenouspeoples/wp-content/uploads/sites/19/2017/12/State-of-Worlds-Indigenous-Peoples\\_III\\_WEB2018.pdf](https://un.org/development/desa/indigenouspeoples/wp-content/uploads/sites/19/2017/12/State-of-Worlds-Indigenous-Peoples_III_WEB2018.pdf).
199. UNDESA, *COVID-19 and Indigenous Peoples* (United Nations Department of Economic and Social Affairs, 2020); <https://un.org/development/desa/indigenouspeoples/covid-19.html>.
200. A. Jurkevics, Land grabbing and the perplexities of territorial sovereignty. *Polit. Theory* **50**, 32–58 (2021).
201. F. Pearce, *Common Ground: Securing Land Rights and Safeguarding the Earth* (International Land Coalition, 2016).
202. Human Rights Watch, *'When We Lost the Forest, We Lost Everything': Oil Palm Plantations and Rights Violations in Indonesia* (Human Rights Watch, 2019); [https://hrw.org/sites/default/files/report\\_pdf/indonesia0919\\_web.pdf](https://hrw.org/sites/default/files/report_pdf/indonesia0919_web.pdf).
203. J. Siringoringo, V. Mambor, in *The Indigenous World 2020* (Eks-Skolen Trykkeri, 2020), pp. 250–266.
204. S. Nagata, C. Dallos, The Orang Asli of West Malaysia: An update. *Moussons* **4**, 97–112 (2001).



205. J. A. Schertow, *Indigenous Peoples of Sarawak Fighting Malaysian Plan to Build 12 Mega-Dams* (Deep Green Resistance News Service, 2019); <https://dgrnewsservice.org/civilization/colonialism/indigenous-peoples-of-sarawak-fighting-malaysian-plan-to-build-12-mega-dams/>.
206. M. Ramutsindela, I. Sinthumule, Property and difference in nature conservation. *Geogr. Rev.* **107**, 415–432 (2017).
207. R. Witter, T. Satterfield, Rhino poaching and the “slow violence” of conservation-related resettlement in Mozambique’s Limpopo National Park. *Geoforum* **101**, 275–284 (2019).
208. E. I. Laltaika, K. M. Askew, *Modes of Dispossession of Indigenous Lands and Territories in Africa* (United Nations, 2018); [https://un.org/development/desa/indigenouspeoples/wp-content/uploads/sites/19/2018/01/Laltaika-and-Askew\\_UN-paper\\_rev3.pdf](https://un.org/development/desa/indigenouspeoples/wp-content/uploads/sites/19/2018/01/Laltaika-and-Askew_UN-paper_rev3.pdf).
209. F. C. Anaya, M. M. Espírito-Santo, Protected areas and territorial exclusion of traditional communities: Analyzing the social impacts of environmental compensation strategies in Brazil. *Ecol. Soc.* **23**, art8 (2018).
210. L. Domínguez, C. Luoma, Decolonising conservation policy: How colonial land and conservation ideologies persist and perpetuate Indigenous injustices at the expense of the environment. *Landarzt* **9**, 65 (2020).
211. D. Bocarejo, D. Ojeda, Violence and conservation: Beyond unintended consequences and unfortunate coincidences. *Geoforum* **69**, 176–183 (2016).
212. E. Lunstrum, M. Ybarra, Deploying difference: Security threat narratives and state displacement from protected areas. *Conserv. Soc.* **16**, 114–124 (2018).
213. N. Shanee, Reclaim Conservation: Conservation discourse and initiatives of the rondas campesinas, North-Eastern Peru. *Conserv. Soc.* **17**, 270–282 (2020).

214. S. Shanee, N. Shanee, W. Lock, M. J. Espejo-Urbe, The development and growth of non-governmental conservation in Peru: Privately and communally protected areas. *Hum. Ecol.* **48**, 681–693 (2020).
215. J. Dehm, Authorizing appropriation?: Law in contested forested spaces. *Eur. J. Int. Law* **28**, 1379–1396 (2017).
216. A. L. Kurian, Ecotourism and conservation refugees: The Indian. *Ecol. Environ. Conserv.* **27**, 308–314 (2021).
217. S. Milne, S. Mahanty, Value and bureaucratic violence in the green economy. *Geoforum* **98**, 133–143 (2019).
218. M. Aguilar-Støen, Better safe than sorry? Indigenous Peoples, carbon cowboys and the governance of REDD in the Amazon. *Forum Dev. Stud.* **44**, 91–108 (2017).
219. C. Hoang, P. Satyal, E. Corbera, ‘This is my garden’: Justice claims and struggles over forests in Vietnam’s REDD+. *Clim. Policy.* **19**, S23–S35 (2019).
220. N. Sylvander, ‘Territorial cleansing’ for whom? Indigenous rights, conservation, and state territorialization in the Bosawas Biosphere Reserve, Nicaragua. *Geoforum.* **121**, 23–32 (2021).
221. J. Mbaria, M. Ogada, *The Big Conservation Lie: The Untold Story of Wildlife Conservation in Kenya* (Lens & Pens Publishing, 2016).
222. T. G. Weldemichel, Othering Pastoralists, state violence, and the remaking of boundaries in Tanzania’s militarised wildlife conservation sector. *Antipode* **52**, 1496–1518 (2020).
223. D. Western, P. Tyrrell, P. Brehony, S. Russell, G. Western, J. Kamanga, Conservation from the inside-out: Winning space and a place for wildlife in working landscapes. *People Nat.* **2**, 279–291 (2020).
224. A. Sirima, K. F. Backman, Communities’ displacement from national park and tourism development in the Usangu Plains, Tanzania. *Curr. Issues Tour.* **16**, 719–735 (2013).

225. D. Brockington, Community conservation, inequality and injustice: Myths of power in protected area management. *Conserv. Soc.* **2**, 411–432 (2004).
226. K. Zephyrin, *Rwanda: The Situation of the Batwa Forest Dwellers and Conservation of the Volcanoes National Park and Nyungwe Natural Forest* (Forest Peoples Programme, Anderen, Netherlands, 2001); <https://forestpeoples.org/sites/fpp/files/publication/2010/10/rwandaeng.pdf>.
227. A. K. Barume, *Heading Towards Extinction? Indigenous Rights in Africa: The Case of the TWA of the Kahuzi-Biega National Park, Democratic Republic of Congo* (International Work Group for Indigenous Affairs, 2000).
228. V. Couillard, J. Gilbert, J. Kenrick, C. Kidd, *Land Rights and the Forest Peoples of Africa: Historical, Legal and Anthropological Perspectives* (Moreton-in-Marsh, 2009); <http://forestpeoples.org/sites/fpp/files/publication/2010/05/overviewlandrightsstudy09eng.pdf>.
229. J. Plummer, The Yanomami: Illegal mining, law, and indigenous rights in the Brazilian Amazon. *Georg. Int. Environ. Law Rev.* **27**, 479–496 (2015).
230. C. Torres, *Illegal Gold Mining Causing Mercury Contamination In Indigenous Groups* (Mongabay, 2016); <https://news.mongabay.com/2016/07/illegal-gold-mining-causing-mercury-contamination-in-indigenous-groups/>.
231. ONIC, *The National Indigenous Organization of Colombia* (2020); <https://onic.org.co/>.
232. UNHCR, ‘To lose our land is to lose ourself’: Indigenous people and forced displacement in Colombia (2020); [https://acnur.org/fileadmin/Documentos/RefugiadosAmericas/Colombia/EN/Indigenous\\_people\\_and\\_forced\\_displacement\\_in\\_Colombia.pdf?view](https://acnur.org/fileadmin/Documentos/RefugiadosAmericas/Colombia/EN/Indigenous_people_and_forced_displacement_in_Colombia.pdf?view).
233. R. K. Hitchcock, The impacts of conservation and militarization on indigenous peoples. *Hum. Nat.* **30**, 217–241 (2019).
234. L. Sales, B. R. Ribeiro, C. A. Chapman, R. Loyola, Multiple dimensions of climate change on the distribution of Amazon primates. *Perspect. Ecol. Conserv.* **18**, 83–90 (2020).

235. G. Cajete, *Native Science: Natural Laws of Interdependence* (Clear Light Publishers, 2000).
236. C. Carroll, *Roots of Our Renewal* (University of Minnesota Press, 2015);  
<http://jstor.org/stable/10.5749/j.ctt15hvz24>.
237. J. Mohawke, in *Thinking in Indian: A John Mohawk Reader*, J. Barreiro, Ed. (Fulcrum Publishing, 2010), pp. 274–277.
238. J. Hernandez, *Fresh Banana Leaves: Healing Indigenous Landscapes Through Indigenous Science* (North Atlantic Books, 2022).
239. O. Venter, R. A. Fuller, D. B. Segan, J. Carwardine, T. Brooks, S. H. M. Butchart, M. Di Marco, T. Iwamura, L. Joseph, D. O’Grady, H. P. Possingham, C. Rondinini, R. J. Smith, M. Venter, J. E. M. Watson, Targeting global protected area expansion for imperiled biodiversity. *PLOS Biol.* **12**, e1001891 (2014).
240. G. Yanqing, R. Baoping, D. Qiang, Z. Jun, P. A. Garber, Z. Jiang, Habitat estimates reveal that there are fewer than 400 Guizhou snub-nosed monkeys, *Rhinopithecus brelichi*, remaining in the wild. *Glob. Ecol. Conserv.* **24**, e01181 (2020).
241. IUCN, in *IUCN World Conservation Congress - Marseille* (2021).
242. D. Urzedo, P. Chatterjee, The colonial reproduction of deforestation in the Brazilian Amazon: Violence against Indigenous peoples for land development. *J. Genocide Res.* **23**, 302–324 (2021).
243. UNDESA, “State of the World’s Indigenous Peoples Rights to Lands, Territories and Resources” (New York, 2021); <https://un.org/development/desa/indigenouspeoples/wp-content/uploads/sites/19/2021/03/State-of-Worlds-Indigenous-Peoples-Vol-V-Final.pdf>.
244. R. K. Dhir, U. Cattaneo, M. V. Ormaza Cabrera, H. Coronado, M. Oelz, *Implementing the ILO Indigenous and Tribal Peoples Convention No. 169: Towards an Inclusive, Sustainable and Just Future* (International Labour Organization, 2019; [https://ilo.org/wcmsp5/groups/public/---dgreports/---dcomm/---publ/documents/publication/wcms\\_735607.pdf](https://ilo.org/wcmsp5/groups/public/---dgreports/---dcomm/---publ/documents/publication/wcms_735607.pdf)).

245. M. Poudyal, J. P. G. Jones, O. S. Rakotonarivo, N. Hockley, J. M. Gibbons, R. Mandimbiniaina, A. Rasoamanana, N. S. Andrianantenaina, B. S. Ramamonjisoa, Who bears the cost of forest conservation? *PeerJ* **6**, e5106 (2018).
246. E. Richard Atleo, *Principles of Tsawalk: An Indigenous Approach to Global Crisis* (UBC Press, 2012).
247. T. B. Falkowski, S. A. W. Diemont, A. Chankin, D. Douterlungne, Lacandon Maya traditional ecological knowledge and rainforest restoration: Soil fertility beneath six agroforestry system trees. *Ecol. Eng.* **92**, 210–217 (2016).
248. M. Padgham, R. Lovelace, M. Salmon, B. Rudis, Osmdata. *J. Open Source Softw.* **2**, 305 (2017).
249. J. Hansford, P. C. Wright, A. Rasoamiaramanana, V. R. Pérez, L. R. Godfrey, D. Errickson, T. Thompson, S. T. Turvey, Early Holocene human presence in Madagascar evidenced by exploitation of avian megafauna. *Sci. Adv.* **4**, eaat6925 (2018).
250. M. Serva, The Settlement of Madagascar: What dialects and languages can tell us. *PLOS ONE* **7**, e30666 (2012).
251. M. Serva, M. Pasquini, Dialects of Madagascar. *PLOS ONE* **15**, e0240170 (2020).
252. M. E. Hurles, B. C. Sykes, M. A. Jobling, P. Forster, The dual origin of the Malagasy in Island Southeast Asia and East Africa: Evidence from maternal and paternal lineages. *Am. J. Hum. Genet.* **76**, 894–901 (2005).
253. H. Li, A. Sinha, A. Anquetil André, C. Spötl, H. B. Vonhof, A. Meunier, G. Kathayat, P. Duan, N. R. G. Voarintsoa, Y. Ning, J. Biswas, P. Hu, X. Li, L. Sha, J. Zhao, R. L. Edwards, H. Cheng, A multimillennial climatic context for the megafaunal extinctions in Madagascar and Mascarene Islands. *Sci. Adv.* **6**, eabb2459 (2020).
254. D. Pierron, M. Heiske, H. Razafindrazaka, I. Rakoto, N. Rabetokotany, B. Ravololomanga, L. M. A. Rakotozafy, M. M. Rakotomalala, M. Razafiarivony, B. Rasoarifetra, M. A. Raharijesy, L. Razafindralambo, Ramilisonina, F. Fanony, S. Lejambre, O. Thomas, A. Mohamed Abdallah, C.

Rocher, A. Arachiche, L. Tonaso, V. Pereda-loth, S. Schiavinato, N. Brucato, F.-X. Ricaut, P. Kusuma, H. Sudoyo, S. Ni, A. Boland, J.-F. Deleuze, P. Beaujard, P. Grange, S. Adelaar, M. Stoneking, J.-A. Rakotoarisoa, C. Radimilahy, T. Letellier, Genomic landscape of human diversity across Madagascar. *Proc. Natl. Acad. Sci.* **114**, E6498–E6506 (2017).

255. World Bank, *The World Bank in Madagascar* (2021);  
<https://worldbank.org/en/country/madagascar/>.

256. D. M. Olson, E. Dinerstein, E. D. Wikramanayake, N. D. Burgess, G. V. N. Powell, E. C. Underwood, J. A. D’Amico, I. Itoua, H. E. Strand, J. C. Morrison, C. J. Loucks, T. F. Allnutt, T. H. Ricketts, Y. Kura, J. F. Lamoreux, W. W. Wettengel, P. Hedao, K. R. Kassem, Terrestrial ecoregions of the world: A new map of life on Earth. *Bioscience* **51**, 933–938 (2001).

257. R Core Development Team, *R: A Language and Environment for Statistical Computing* (R Foundation for Statistical Computing, 2021).

258. T. Keitt, R. Bivand, E. Pebesma, B. Rowlingson, rgdal: Bindings for the geospatial data abstraction library (2010).

259. R. Hijmans, J. van Etten, Raster: Geographic data analysis and modeling. *R Packag. Version* **517**, 2–12 (2014).

260. H. Wickham, *ggplot2: Elegant Graphics for Data Analysis* (Springer-Verlag, 2016).

261. C. Rondinini, M. Di Marco, F. Chiozza, G. Santulli, D. Baisero, P. Visconti, M. Hoffmann, J. Schipper, S. N. Stuart, M. F. Tognelli, G. Amori, A. Falcucci, L. Maiorano, L. Boitani, Global habitat suitability models of terrestrial mammals. *Philos. Trans. R. Soc. B Biol. Sci.* **366**, 2633–2641 (2011).

262. G. F. Ficetola, C. Rondinini, A. Bonardi, V. Katariya, E. Padoa-Schioppa, A. Angulo, An evaluation of the robustness of global amphibian range maps. *J. Biogeogr.* **41**, 211–221 (2014).

263. M. Hoffmann, C. Hilton-Taylor, A. Angulo, M. Böhm, T. M. Brooks, S. H. M. Butchart, K. E. Carpenter, J. Chanson, B. Collen, N. A. Cox, W. R. T. Darwall, N. K. Dulvy, L. R. Harrison, V.

Katariya, C. M. Pollock, S. Quader, N. I. Richman, A. S. L. Rodrigues, M. F. Tognelli, J.-C. Vié, J. M. Aguiar, D. J. Allen, G. R. Allen, G. Amori, N. B. Ananjeva, F. Andreone, P. Andrew, A. L. A. Ortiz, J. E. M. Baillie, R. Baldi, B. D. Bell, S. D. Biju, J. P. Bird, P. Black-Decima, J. J. Blanc, F. Bolaños, W. Bolivar-G, I. J. Burfield, J. A. Burton, D. R. Capper, F. Castro, G. Catullo, R. D. Cavanagh, A. Channing, N. L. Chao, A. M. Chenery, F. Chiozza, V. Clausnitzer, N. J. Collar, L. C. Collett, B. B. Collette, C. F. C. Fernandez, M. T. Craig, M. J. Crosby, N. Cumberlidge, A. Cuttelod, A. E. Derocher, A. C. Diesmos, J. S. Donaldson, J. W. Duckworth, G. Dutton, S. K. Dutta, R. H. Emslie, A. Farjon, S. Fowler, J. Freyhof, D. L. Garshelis, J. Gerlach, D. J. Gower, T. D. Grant, G. A. Hammerson, R. B. Harris, L. R. Heaney, S. B. Hedges, J.-M. Hero, B. Hughes, S. A. Hussain, J. Icochea M, R. F. Inger, N. Ishii, D. T. Iskandar, R. K. B. Jenkins, Y. Kaneko, M. Kottelat, K. M. Kovacs, S. L. Kuzmin, E. La Marca, J. F. Lamoreux, M. W. N. Lau, E. O. Lavilla, K. Leus, R. L. Lewison, G. Lichtenstein, S. R. Livingstone, V. Lukoschek, D. P. Mallon, P. J. K. McGowan, A. McIvor, P. D. Moehlman, S. Molur, A. M. Alonso, J. A. Musick, K. Nowell, R. A. Nussbaum, W. Olech, N. L. Orlov, T. J. Papenfuss, G. Parra-Olea, W. F. Perrin, B. A. Polidoro, M. Pourkazemi, P. A. Racey, J. S. Ragle, M. Ram, G. Rathbun, R. P. Reynolds, A. G. J. Rhodin, S. J. Richards, L. O. Rodríguez, S. R. Ron, C. Rondinini, A. B. Rylands, Y. Sadovy de Mitcheson, J. C. Sanciangco, K. L. Sanders, G. Santos-Barrera, J. Schipper, C. Self-Sullivan, Y. Shi, A. Shoemaker, F. T. Short, C. Sillero-Zubiri, D. L. Silvano, K. G. Smith, A. T. Smith, J. Snoeks, A. J. Stattersfield, A. J. Symes, A. B. Taber, B. K. Talukdar, H. J. Temple, R. Timmins, J. A. Tobias, K. Tsytsulina, D. Tweddle, C. Ubeda, S. V. Valenti, P. Paul van Dijk, L. M. Veiga, A. Veloso, D. C. Wege, M. Wilkinson, E. A. Williamson, F. Xie, B. E. Young, H. R. Akçakaya, L. Bennun, T. M. Blackburn, L. Boitani, H. T. Dublin, G. A. B. da Fonseca, C. Gascon, T. E. Lacher, G. M. Mace, S. A. Mainka, J. A. McNeely, R. A. Mittermeier, G. M. Reid, J. P. Rodriguez, A. A. Rosenberg, M. J. Samways, J. Smart, B. A. Stein, S. N. Stuart, The impact of conservation on the status of the world's vertebrates. *Science* **330**, 1503–1509 (2010).

264. B. B. N. Strassburg, A. S. L. Rodrigues, M. Gusti, A. Balmford, S. Fritz, M. Obersteiner, R. Kerry Turner, T. M. Brooks, Impacts of incentives to reduce emissions from deforestation on global species extinctions. *Nat. Clim. Chang.* **2**, 350–355 (2012).

265. C. N. Jenkins, K. S. Van Houtan, S. L. Pimm, J. O. Sexton, US protected lands mismatch biodiversity priorities. *Proc. Natl. Acad. Sci.* **112**, 5081–5086 (2015).

266. L. N. K. Davidson, N. K. Dulvy, Global marine protected areas to prevent extinctions. *Nat. Ecol. Evol.* **1**, 0040 (2017).
267. S. Le Saout, M. Hoffmann, Y. Shi, A. Hughes, C. Bernard, T. M. Brooks, B. Bertzky, S. H. M. Butchart, S. N. Stuart, T. Badman, A. S. L. Rodrigues, Protected areas and effective biodiversity conservation. *Science* **342**, 803–805 (2013).
268. J. F. González-Maya, L. R. Viquez-R, J. L. Belant, G. Ceballos, Effectiveness of protected areas for representing species and populations of terrestrial mammals in Costa Rica. *PLOS ONE* **10**, e0124480 (2015).
269. C. J. Klein, C. J. Brown, B. S. Halpern, D. B. Segan, J. McGowan, M. Beger, J. E. M. Watson, Shortfalls in the global protected area network at representing marine biodiversity. *Sci. Rep.* **5**, 17539 (2015).
270. S. Shanee, N. Shanee, B. Monteferri, N. Allgas, A. Alarcon Pardo, R. H. Horwich, Protected area coverage of threatened vertebrates and ecoregions in Peru: Comparison of communal, private, and state reserves. *J. Environ. Manage.* **202**, 12–20 (2017).
271. Á. Fernández-Llamazares, A. López-Baucells, P. M. Velazco, A. Gyawali, R. Rocha, J. Terraube, M. Cabeza, The importance of Indigenous Territories for conserving bat diversity across the Amazon biome. *Perspect. Ecol. Conserv.* **19**, 10–20 (2021).
272. F. Montesino Pouzols, T. Toivonen, E. Di Minin, A. S. Kukkala, P. Kullberg, J. Kuusterä, J. Lehtomäki, H. Tenkanen, P. H. Verburg, A. Moilanen, Global protected area expansion is compromised by projected land-use and parochialism. *Nature* **516**, 383–386 (2014).
273. J. Larsson, eulerr: Area-proportional Euler and Venn diagrams with ellipses (2020; <https://cran.r-project.org/package=eulerr>).
